# Supplementary material for: A microwave-assisted intramolecular aminopalladation-triggered domino sequence: an atom economical route to 5,10-dihydroindeno[1,2-b]indoles
Source: Royal Society of Chemistry journal article supplement (doi:10.1039/d3ob00041a), 2023-01-01

**Microwave-Assisted Intramolecular Aminopalladation-Triggered Domino Sequence: Atom  
Economical Route to 5,10-Dihydroindeno[1,2-*b*]indoles**

Tanvi Jandial,<sup>a</sup> Anish Gupta,<sup>a</sup> Gowsia Jan,<sup>a</sup> Muthu Karuppasamy,<sup>a</sup> Subbiah Nagarajan,<sup>b</sup>  
C. Uma Maheswari<sup>c</sup> and Vellaisamy Sridharan\*<sup>a</sup>

<sup>a</sup>*Department of Chemistry and Chemical Sciences, Central University of Jammu, Rahya-Suchani (Bagla),  
District-Samba, Jammu-181143, J&K, India. Email: vesridharan@gmail.com, sridharan.che@cuammu.ac.in*

<sup>b</sup>*Department of Chemistry, National Institute of Technology, Warangal, Warangal-506004, Telangana, India.*

<sup>c</sup>*Department of Chemistry, School of Chemical and Biotechnology, SASTRA Deemed University, Thanjavur-  
613401, Tamil Nadu, India.*

**Table of Contents**

|   |                                                                    |     |
|---|--------------------------------------------------------------------|-----|
| 1 | General Information                                                | S2  |
| 2 | General Procedure for the Synthesis of Enones <b>S3a-j</b>         | S2  |
| 3 | General Procedure for the Synthesis of Enones <b>S3k-m</b>         | S4  |
| 4 | General Procedure for the Synthesis of 2-Alkynylanilines <b>S6</b> | S5  |
| 5 | General Procedure for the Synthesis of Compounds <b>1</b>          | S6  |
| 6 | Optimization Table (Additional Entries)                            | S11 |
| 7 | Copies of <sup>1</sup> H and <sup>13</sup> C NMR Spectra           | S12 |

## 1. General Information

All reagents and solvents were purchased from commercial suppliers (Alfa Aesar, Sigma-Aldrich, Merck, SDFine, SRL, CDH) and used without further purification. All reactions were carried out in oven-dried glassware. The reactions were monitored by thin layer chromatography using Merck silica gel 60 F254 and visualized by UV detection or using molecular iodine or *p*-anisaldehyde stain. Silica gel (230-400 mesh) was used for flash column chromatography. Melting points were recorded on a melting point apparatus in capillaries and are uncorrected.  $^1\text{H}$  and  $^{13}\text{C}\{^1\text{H}\}$ -NMR spectra were recorded in  $\text{CDCl}_3$  at room temperature on a Bruker AC-400 spectrometer operating at 400 MHz for  $^1\text{H}$  and 101 MHz for  $^{13}\text{C}\{^1\text{H}\}$ . Chemical shifts ( $\delta$ ) are expressed in ppm using TMS as an internal standard and coupling constants ( $J$ ) are given in Hz. Infrared (IR) spectra was recorded on Perkin-Elmer FTIR spectrophotometer using KBr. Elemental analyses were determined at the CAI de Microanalysis Elemental, Universidad Complutense, by using a Leco 932 CHNS combustion microanalyzer. Microwave-assisted synthesis was carried out in a CEM focused microwave synthesis system (Discover SP synthesizer) containing single-mode microwave cavity producing controlled irradiation at 2455 MHz. Reaction times refer to hold times at the temperatures indicated and not to total irradiation times. The temperature on the bottom of the reaction vessel was measured with an IR sensor located below the microwave cavity floor. The reactions were carried out under a pressure of 200 Pa and a power of 150 W in sealed reaction vessels.

## 2. General Procedure for the Synthesis of Enones S3a-j

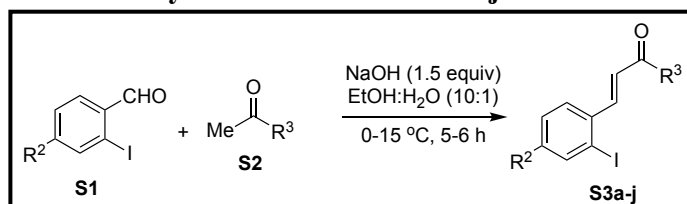

Compounds S3 were prepared using the literature procedure.<sup>1</sup>

### (*E*)-3-(2-Iodophenyl)-1-phenylprop-2-en-1-one (S3a)<sup>1</sup>

Pale yellow viscous liquid (91%, 3.03 g).

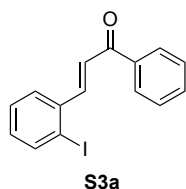

### (*E*)-3-(2-Iodophenyl)-1-(*p*-tolyl)prop-2-en-1-one (S3b)<sup>1</sup>

Yellow viscous liquid (89%, 3.09 g).

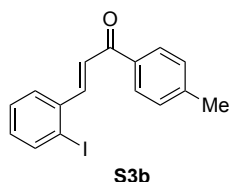

<sup>1</sup>M. Karuppasamy, B. S. Vachan, T. Jandial, S. B. Annes, N. Bhuvanesh, C. U. Maheswari, V. Sridharan, *Adv. Synth. Catal.*, 2020, **362**, 2716–2724.

**(E)-3-(2-Iodophenyl)-1-(4-methoxyphenyl)prop-2-en-1-one (S3c)<sup>1</sup>**

Colourless solid (93%, 3.38 g); mp: 95-97 °C.

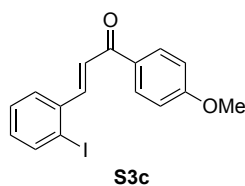

**(E)-1-(4-Chlorophenyl)-3-(2-iodophenyl)prop-2-en-1-one (S3d)<sup>1</sup>**

Off-white solid (65%, 2.39 g); mp: 71-73 °C.

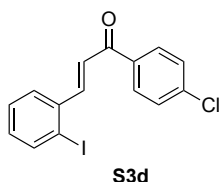

**(E)-3-(2-Iodophenyl)-1-(thiophen-2-yl)prop-2-en-1-one (S3e)<sup>1</sup>**

Pale brown viscous liquid (81%, 2.75 g).

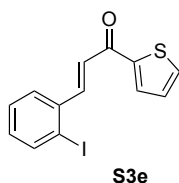

**(E)-1-(Furan-2-yl)-3-(2-iodophenyl)prop-2-en-1-one (S3f)<sup>1</sup>**

Pale brown viscous liquid (73%, 2.36 g).

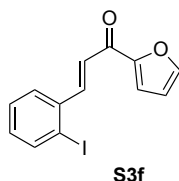

**(E)-3-(4-Chloro-2-iodophenyl)-1-(p-tolyl)prop-2-en-1-one (S3g)**

Colourless solid (3.41 g, 86%); mp: 114-116 °C; IR (KBr): 3052, 3002, 1860, 1682, 1611, 1442, 1326, 1281, 1169, 1052 cm<sup>-1</sup>. <sup>1</sup>H NMR (CDCl<sub>3</sub>, 400 MHz) δ 7.97 (d, *J* = 8.0 Hz, 2H), 7.89 (d, *J* = 15.5 Hz, 1H), 7.84 (d, *J* = 8.4 Hz, 1H), 7.65 (d, *J* = 1.9 Hz, 1H), 7.37 (d, *J* = 15.5 Hz, 1H), 7.33 (d, *J* = 7.9 Hz, 2H), 7.08 (dd, *J* = 8.4, 1.9 Hz, 1H), 2.46 (s, 3H); <sup>13</sup>C NMR (101 MHz, CDCl<sub>3</sub>) δ 189.3, 146.0, 144.2, 141.0, 140.2, 135.0, 134.9, 131.1, 129.5, 128.9, 127.3, 126.1, 98.5,

21.8. Anal Calcd for C<sub>16</sub>H<sub>12</sub>ClIO: C, 50.23; H, 3.16. Found: C, 50.03; H, 3.08.

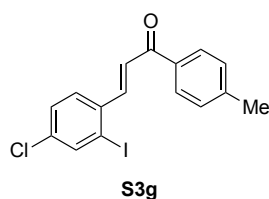

**(E)-3-(4-Chloro-2-iodophenyl)-1-(4-chlorophenyl)prop-2-en-1-one (S3h)**

Off-white solid (3.62 g, 82%); mp: 145-147 °C; IR (KBr): 3062, 1900, 1692, 1611, 1442, 1299, 1252, 1189, 1065 cm<sup>-1</sup>. <sup>1</sup>H NMR (CDCl<sub>3</sub>, 400 MHz) δ 7.99 (d, *J* = 8.6 Hz, 2H), 7.90 (d, *J* = 15.5 Hz, 1H), 7.85 (d, *J* = 8.4 Hz, 1H), 7.66 (d, *J* = 2.3 Hz, 1H), 7.51 (d, *J* = 8.6 Hz, 2H), 7.32 (d, *J* = 15.5 Hz, 1H), 7.10 (dd, *J* = 8.4, 2.4 Hz, 1H); <sup>13</sup>C NMR (101 MHz, CDCl<sub>3</sub>) δ 188.5, 146.9, 141.1, 139.8, 139.7, 135.9, 135.1, 131.4, 130.1,

129.1, 127.4, 125.5, 98.6. Anal Calcd for C<sub>15</sub>H<sub>9</sub>Cl<sub>2</sub>IO: C, 44.70; H, 2.25. Found: C, 44.33; H, 2.22.

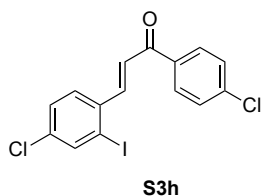

### (*E/Z*)-3-(2-Iodophenyl)-1-(naphthalen-2-yl)prop-2-en-1-one (S3i)

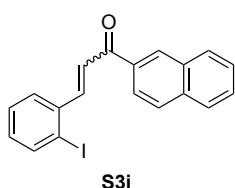

*Trans:cis* = 1:0.62; Viscous liquid (2.70 g, 73%); IR (KBr): 3853, 2827, 1610, 1457, 1293, 1225, 1188, 1127, 1042  $\text{cm}^{-1}$ .  $^1\text{H}$  NMR ( $\text{CDCl}_3$ , 400 MHz)  $\delta$  8.57 (s, *trans*, 1H), 8.42 (s, *cis*, 1H), 8.13 (dd,  $J = 8.6, 1.6$  Hz, *trans*, 1H), 8.06 (d,  $J = 15.7$  Hz, *trans*, 1H), 8.02 (d,  $J = 8.0$  Hz, *trans*, 1H), 7.98-7.92 (m, *trans* & *cis*, 5H), 7.83-7.74 (m, *trans* & *cis*, 4H), 7.66-7.54 (m, *trans* & *cis*, 4H), 7.50 (d,  $J = 15.6$  Hz, *trans*, 1H), 7.45 (t,  $J = 7.6$  Hz, *trans*, 1H), 7.26 (d,  $J = 8.0$  Hz, *cis*, 1H), 7.18 (d,  $J = 12.3$  Hz, *cis*, 1H), 7.14-7.05 (m, *trans* & *cis*, 2H), 6.81-6.76 (m, *cis*, 2H);  $^{13}\text{C}$  NMR (101 MHz,  $\text{CDCl}_3$ )  $\delta$   $^{13}\text{C}$  NMR (101 MHz,  $\text{CDCl}_3$ )  $\delta^*$  194.2, 190.3, 147.9, 142.8, 140.2, 139.7, 138.7, 138.5, 135.6, 135.2, 134.3, 132.6, 132.4, 131.5, 131.4, 130.4, 129.7, 129.6, 129.5, 128.7, 128.6, 128.5, 128.4, 128.2, 127.9, 127.7, 127.6, 126.9, 126.7, 125.5, 124.6, 124.1, 101.8, 98.6. Anal Calcd for  $\text{C}_{19}\text{H}_{13}\text{IO}$ : C, 59.40; H, 3.41. Found: C, 59.12; H, 3.32. \* Four aromatic carbons have merged with others.

### (*E/Z*)-3-(4-Chloro-2-iodophenyl)-1-phenylprop-2-en-1-one (S3j)

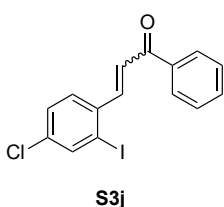

*Trans:cis* = 1:0.28; Viscous liquid (3.24 g, 81%); IR (KBr): 3051, 1896, 1670, 1603, 1446, 1307, 1262, 1186, 1091  $\text{cm}^{-1}$ .  $^1\text{H}$  NMR ( $\text{CDCl}_3$ , 400 MHz)  $\delta$  8.06 (d,  $J = 7.7$  Hz, *trans*, 2H), 7.99 (t,  $J = 7.7$  Hz, *cis*, 1H), 7.91 (d,  $J = 15.5$  Hz, *trans*, 1H), 7.86 (s, *cis*, 1H), 7.85 (d,  $J = 8.4$  Hz, *trans* & *cis*, 2H), 7.70-7.62 (m, *trans* & *cis*, 3H), 7.56-7.52 (m, *trans*, 2H), 7.49 (d,  $J = 7.4$  Hz, *cis*, 1H), 7.42-7.36 (m, *trans* & *cis*, 2H), 7.23 (d,  $J = 2.1$  Hz, *cis*, 1H), 7.09 (dd,  $J = 8.4, 2.2$  Hz, *trans* 1H), 7.01 (d,  $J = 12.2$  Hz, *cis*, 1H), 6.88 (dd,  $J = 8.4, 2.1$  Hz, *cis*, 1H), 6.77 (d,  $J = 12.3$  Hz, *cis*, 1H);  $^{13}\text{C}$  NMR (101 MHz,  $\text{CDCl}_3$ )  $\delta$  193.2, 189.8, 146.5, 142.2, 141.0, 141.1, 140.0, 139.7, 137.6, 137.2, 135.0, 134.2, 133.3, 133.2, 131.3, 130.2, 129.8, 128.8, 128.7, 128.6, 128.4, 128.3, 127.4, 126.0, 98.6, 95.6. Anal Calcd for  $\text{C}_{15}\text{H}_{10}\text{ClIO}$ : C, 48.88; H, 2.73. Found: C, 48.75; H, 2.69.

### 3. General Procedure for the Synthesis of Enones S3k-m

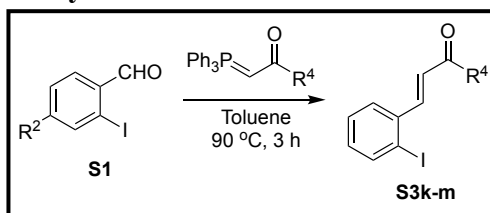

### (*E*)-4-(2-Iodophenyl)but-3-en-2-one (S3k)<sup>1</sup>

Colourless solid (81%, 2.20 g), mp: 54-56 °C.

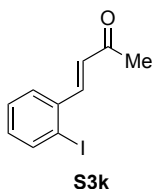

### Methyl (*E/Z*)-3-(2-iodophenyl)acrylate (S3l)<sup>1</sup>

*Trans:cis* = 1:0.31; Colourless liquid (65%, 1.87 g).

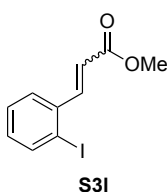

### (E)-4-(4-Chloro-2-iodophenyl)but-3-en-2-one (S3m)

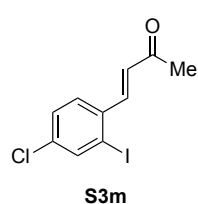

2.63. Found: C, 39.04; H, 2.61.

Off-white solid (2.81 g, 84%); mp: 121-123 °C; IR (KBr): 3049, 3005, 1889, 1685, 1604, 1446, 1307, 1266, 1178, 1085  $\text{cm}^{-1}$ .  $^1\text{H}$  NMR ( $\text{CDCl}_3$ , 400 MHz)  $\delta$  7.83 (d,  $J = 8.5$  Hz, 1H), 7.64 (d,  $J = 16.1$  Hz, 1H), 7.55 (d,  $J = 2.2$  Hz, 1H), 7.08 (dd,  $J = 8.4, 2.4$  Hz, 1H), 6.56 (d,  $J = 16.1$  Hz, 1H), 2.4 (s, 3H);  $^{13}\text{C}$  NMR (101 MHz,  $\text{CDCl}_3$ )  $\delta$  197.7, 145.2, 140.9, 139.4, 135.2, 131.4, 130.69, 127.3, 98.4, 27.6. Anal Calcd for  $\text{C}_{10}\text{H}_8\text{ClIO}$ : C, 39.18; H,

### 4. General Procedure for the Synthesis of 2-Alkynylanilines S6

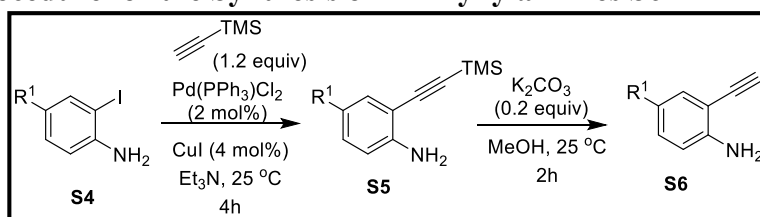

Compounds **S6** were prepared using the literature procedure.<sup>2</sup>

### 2-Ethynylaniline (S6a)<sup>2</sup>

Yellow oil (0.947 g, 81%)

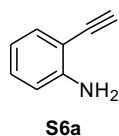

### 4-Chloro-2-ethynylaniline (S6b)<sup>3</sup>

Brown solid (1.19 g, 79%), mp: 56-58 °C.

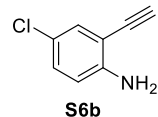

### 2-Ethynyl-4-methylaniline (S6c)<sup>2</sup>

Orange oil (0.95 g, 73%).

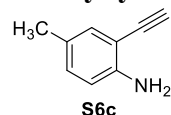

### 2-Ethynyl-4-(trifluoromethyl)aniline (S6d)<sup>4</sup>

Brown oil (1.31 g, 71%).

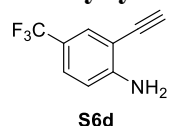

<sup>2</sup>A. Isobe, J. Takagi, T. Katagiri, K. Uneyama, *Org. Lett.*, 2008, **10**, 2657–2659.

<sup>3</sup>B. M. Trost, A. Mc Clory, *Angew. Chem. Int. Ed.*, 2007, **46**, 2074–2077.

<sup>4</sup>X. Zhao, X. Song, H. Jin, Z. Zeng, Q. Wang, M. Rudolph, F. Rominger, A. S. K. Hashmi, *Adv. Synth. Catal.*, 2018, **360**, 2720–2726.

## 5. General Procedure for the Synthesis of Compounds 1

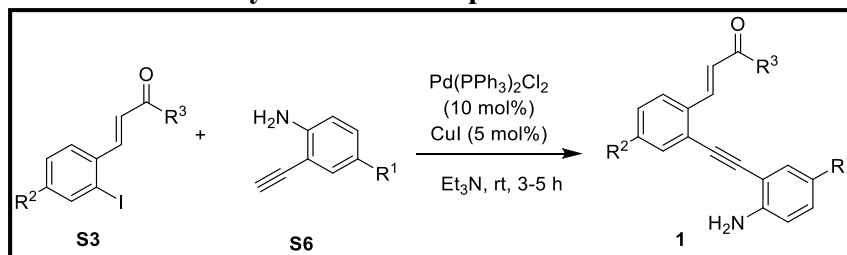

To a stirred solution of compound **S3** (1 mmol, 1.0 equiv) in Et<sub>3</sub>N (15 mL) were added 2-ethynylaniline **S6** (6 mmol, 1.2 equiv), Pd(PPh<sub>3</sub>)<sub>2</sub>Cl<sub>2</sub> (0.1 mmol, 10 mol%) and CuI (0.05 mmol, 5 mol %) successively. The resulting mixture was stirred at room temperature for 3-5 h. After the completion of the reaction, as indicated by TLC, the reaction mixture was diluted with water and extracted with ethyl acetate (2 × 20 mL). The organic layer was washed with water and brine and dried over anhydrous Na<sub>2</sub>SO<sub>4</sub>. The solvent was evaporated to dryness under reduced pressure and the crude mixture was chromatographed over silica using petroleum ether and ethyl acetate mixture (85:15 to 80:20, v/ v) as the eluent to access the desired compounds **1a-t**.

### (*E*)-3-(2-((2-Aminophenyl)ethynyl)phenyl)-1-phenylprop-2-en-1-one (**1a**)

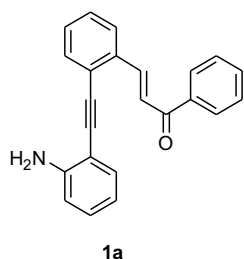

Pale brown solid (0.271 g, 84%); mp: 136-138°C; IR (KBr): 3452, 3369, 2191, 1642, 1510, 1317, 1088 cm<sup>-1</sup>. <sup>1</sup>H NMR (CDCl<sub>3</sub>, 400 MHz) δ 8.41 (d, *J* = 15.8 Hz, 1H), 8.04 (d, *J* = 7.6 Hz, 2H), 7.80-7.78 (m, 1H), 7.66 (d, *J* = 15.8 Hz, 1H), 7.63-7.58 (m, 2H), 7.51-7.48 (m, 2H), 7.42-7.37 (m, 3H), 7.18 (t, *J* = 8.0 Hz, 1H), 6.76-6.72 (m, 2H), 4.39 (s, 2H); <sup>13</sup>C NMR (CDCl<sub>3</sub>, 101 MHz) δ 190.8, 148.2, 142.9, 138.1, 135.8, 132.7, 132.8, 132.4, 130.2, 130.0, 128.7, 128.6, 128.4, 126.7, 124.7, 123.9, 117.9, 114.6, 107.40, 92.9, 92.43. Anal Calcd for C<sub>23</sub>H<sub>17</sub>NO: C, 85.42; H, 5.30; N, 4.33. Found: C, 85.25; H, 5.23; N, 4.29.

### (*E*)-3-(2-((2-Aminophenyl)ethynyl)phenyl)-1-(*p*-tolyl)prop-2-en-1-one (**1b**)

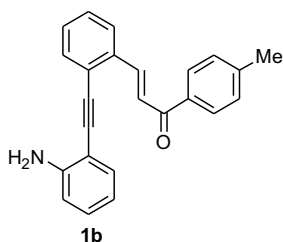

Pale yellow solid (0.302 g, 87%); mp: 96-98 °C; IR (KBr): 3431, 3342, 3045, 2216, 1681, 1470, 1301, 1193, 1052 cm<sup>-1</sup>. <sup>1</sup>H NMR (CDCl<sub>3</sub>, 400 MHz) δ 8.40 (d, *J* = 15.6 Hz, 1H), 7.96-7.61 (m, 5H), 7.40-7.18 (m, 6H), 6.75 (d, *J* = 7.7 Hz, 2H), 4.42 (s, 2H), 2.44 (s, 3H); <sup>13</sup>C NMR (101 MHz, CDCl<sub>3</sub>) δ 190.3, 148.2, 143.7, 142.5, 135.9, 135.5, 132.7, 132.4, 130.2, 129.9, 129.4, 128.8, 128.4, 126.6, 124.7, 123.9, 117.9, 114.6, 107.4, 92.8, 92.5, 21.7. Anal Calcd for C<sub>24</sub>H<sub>19</sub>NO: C, 85.43; H, 5.68; N, 4.15. Found: C, 85.29; H, 5.57; N, 4.06.

### (*E*)-3-(2-((2-Aminophenyl)ethynyl)phenyl)-1-(4-chlorophenyl)prop-2-en-1-one (**1c**)

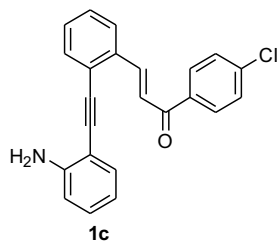

Pale yellow solid (0.289 g, 81%); mp: 112-114 °C; IR (KBr): 3469, 3370, 2198, 1639, 1505, 1312, 1097 cm<sup>-1</sup>. <sup>1</sup>H NMR (CDCl<sub>3</sub>, 400 MHz) δ 8.38 (d, *J* = 15.8 Hz, 1H), 7.98-7.95 (m, 2H), 7.78-7.75 (m, 1H), 7.64-7.60 (m, 2H), 7.45 (dd, *J* = 8.6, 1.9 Hz, 2H), 7.42-7.39 (m, 2H), 7.37 (dd, *J* = 8.2, 1.6 Hz, 1H), 7.19 (td, *J* = 7.8, 1.5 Hz, 1H), 6.77-6.73 (m, 2H), 4.38 (s, 2H); <sup>13</sup>C NMR (101 MHz, CDCl<sub>3</sub>) δ 189.6, 148.1, 143.5, 139.2, 136.4, 135.5, 132.8, 132.4, 130.3, 130.2, 130.0, 128.9, 128.5, 126.8, 124.7, 123.4, 118.0, 114.6, 107.3, 92.9, 92.4. Anal Calcd for C<sub>23</sub>H<sub>16</sub>ClNO: C, 77.20; H, 4.51; N, 3.91. Found: C, 76.89; H, 4.54; N, 3.97.

**(E)-3-(2-((2-Aminophenyl)ethynyl)phenyl)-1-(naphthalen-2-yl)prop-2-en-1-one (1d)**

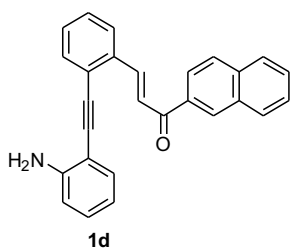

Yellow viscous liquid (0.314 g, 82%); IR (KBr): 3420, 3325, 3065, 2105, 1656, 1476, 1315, 1178, 1005  $\text{cm}^{-1}$ .  $^1\text{H}$  NMR ( $\text{CDCl}_3$ , 400 MHz)  $\delta$  8.55 (s, 1H), 8.45 (d,  $J = 15.8$  Hz, 1H), 8.12 (dd,  $J = 8.6, 1.1$  Hz, 1H), 7.95-7.83 (m, 5H), 7.64-7.61 (m, 2H), 7.55 (t,  $J = 7.5$  Hz, 1H), 7.43-7.41 (m, 2H), 7.35 (d,  $J = 7.6$  Hz, 1H), 7.17 (t,  $J = 7.5$  Hz, 1H), 6.73 (d,  $J = 8.1$  Hz, 1H), 6.69 (t,  $J = 7.6$  Hz, 1H), 4.38 (s, 2H);  $^{13}\text{C}$  NMR (101 MHz,  $\text{CDCl}_3$ )  $\delta$  190.6, 148.2, 142.9, 135.7, 135.6, 135.4, 132.9, 132.6, 132.4, 130.2, 130.7, 130.3, 129.2, 128.4, 128.5, 127.8, 126.9, 126.8, 126.4, 124.6, 124.5, 123.8, 117.9, 114.6, 107.4, 92.9, 92.5. Anal Calcd for  $\text{C}_{27}\text{H}_{19}\text{NO}$ : C, 86.84; H, 5.13; N, 3.75. Found: C, 86.66; H, 5.07; N, 3.69.

**(E)-3-(2-((2-Aminophenyl)ethynyl)phenyl)-1-(thiophen-2-yl)prop-2-en-1-one (1e)**

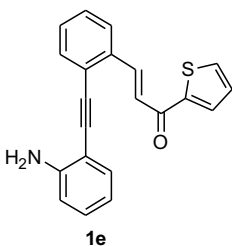

Pale yellow solid (0.240 g, 73%); mp: 128-130  $^{\circ}\text{C}$ ; IR (KBr): 3371, 2911, 1665, 1564, 1477, 1413, 1304, 1221, 1072  $\text{cm}^{-1}$ .  $^1\text{H}$  NMR ( $\text{CDCl}_3$ , 400 MHz)  $\delta$  8.47 (d,  $J = 15.7$  Hz, 1H), 7.89 (d,  $J = 2.5$  Hz, 1H), 7.80-7.78 (m, 1H), 7.71-7.70 (m, 1H), 7.62 (d,  $J = 7.7$  Hz, 1H), 7.57 (d,  $J = 15.7$  Hz, 1H), 7.44-7.40 (m, 3H), 7.20-7.16 (m, 2H), 6.76-6.71 (m, 2H), 4.43 (s, 2H);  $^{13}\text{C}$  NMR (101 MHz,  $\text{CDCl}_3$ )  $\delta$  182.2, 148.2, 145.4, 142.1, 135.6, 134.0, 132.7, 132.4, 132.1, 130.2, 130.1, 128.4, 128.3, 126.6, 124.8, 123.3, 117.9, 114.6, 107.4, 93.0, 92.4. Anal Calcd for  $\text{C}_{21}\text{H}_{15}\text{NOS}$ : C, 76.57; H, 4.59; N, 4.25. Found: C, 76.41; H, 4.48; N, 4.17.

**(E)-4-(2-((2-Aminophenyl)ethynyl)phenyl)but-3-en-2-one (1f)**

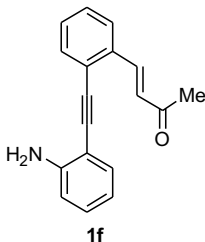

Pale yellow solid (0.211 g, 81%); mp: 94-96  $^{\circ}\text{C}$ ; IR (KBr): 3450, 2188, 1656, 1487, 1369, 1331, 1223, 1174, 1102  $\text{cm}^{-1}$ .  $^1\text{H}$  NMR ( $\text{CDCl}_3$ , 400 MHz)  $\delta$  8.17 (d,  $J = 16.4$  Hz, 1H), 7.69 (d,  $J = 7.0$  Hz, 1H), 7.60 (d,  $J = 7.1$  Hz, 1H), 7.42-7.38 (m, 3H), 7.20 (t,  $J = 7.8$  Hz, 1H), 6.81-6.75 (m, 3H), 4.35 (s, 2H), 2.44 (s, 3H);  $^{13}\text{C}$  NMR (101 MHz,  $\text{CDCl}_3$ )  $\delta$  198.7, 148.1, 141.5, 135.4, 132.7, 132.2, 130.3, 130.1, 128.6, 128.6, 126.1, 124.5, 118.1, 114.6, 107.4, 92.6, 92.2, 27.4. Anal Calcd for  $\text{C}_{18}\text{H}_{15}\text{NO}$ : C, 82.73; H, 5.79; N, 5.36. Found: C, 82.02; H, 5.65; N, 5.41.

**(E)-3-(2-((2-Aminophenyl)ethynyl)-5-chlorophenyl)-1-phenylprop-2-en-1-one (1g)**

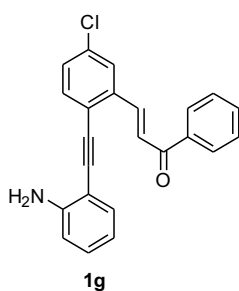

Pale yellow solid (0.275 g, 77%); mp: 129-131  $^{\circ}\text{C}$ ; IR (KBr): 3452, 3351, 2169, 1642, 1571, 1305, 1087  $\text{cm}^{-1}$ .  $^1\text{H}$  NMR ( $\text{CDCl}_3$ , 400 MHz)  $\delta$  8.32 (d,  $J = 15.8$  Hz, 1H), 8.04 (d,  $J = 7.3$  Hz, 2H), 7.75 (d,  $J = 1.8$  Hz, 1H), 7.65-7.59 (m, 2H), 7.54-7.49 (m, 3H), 7.38-7.35 (m, 2H), 7.18 (td,  $J = 8.2, 1.1$  Hz, 1H), 6.73 (t,  $J = 8.0$  Hz, 2H), 4.38 (s, 2H);  $^{13}\text{C}$  NMR (101 MHz,  $\text{CDCl}_3$ )  $\delta$  190.2, 148.3, 141.4, 137.8, 137.3, 134.3, 133.7, 133.1, 132.4, 130.4, 130.0, 128.7, 128.6, 126.4, 124.6, 123.2, 117.9, 114.6, 107.1, 93.8, 91.4. Anal Calcd for  $\text{C}_{23}\text{H}_{16}\text{ClNO}$ : C, 77.20; H, 4.51; N, 3.91. Found: C, 76.92; H, 4.42; N, 3.85.

**(E)-3-(2-((2-Aminophenyl)ethynyl)-5-chlorophenyl)-1-(p-tolyl)prop-2-en-1-one (1h)**

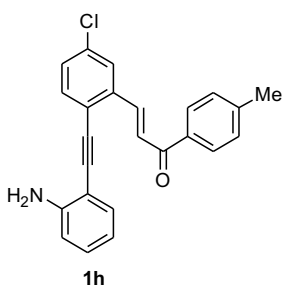

Pale yellow solid (0.308 g, 83%); mp: 121-123  $^{\circ}\text{C}$ ; IR (KBr): 3439, 3346, 3055, 2204, 1656, 1499, 1318, 1173, 1027  $\text{cm}^{-1}$ .  $^1\text{H}$  NMR ( $\text{CDCl}_3$ , 400 MHz)  $\delta$  8.31 (d,  $J = 1.7$  Hz, 1H), 7.96 (d,  $J = 8.1$  Hz, 2H), 7.74 (d,  $J = 1.7$  Hz, 1H), 7.63 (d,  $J = 15.8$  Hz, 1H), 7.53 (d,  $J = 8.3$  Hz, 1H), 7.37 (td,  $J = 8.3, 1.8$  Hz, 2H), 7.30 (d,  $J = 7.9$  Hz, 2H), 7.18 (t,  $J = 8.1$  Hz, 1H), 6.76-6.71 (m, 2H), 4.40 (s, 2H), 2.45 (s, 3H);  $^{13}\text{C}$  NMR (101 MHz,  $\text{CDCl}_3$ )  $\delta$  189.7, 148.3, 144.0, 140.9,

137.4, 135.3, 134.3, 133.7, 132.4, 130.4, 129.9, 129.4, 128.8, 126.4, 124.7, 123.1, 117.9, 114.6, 107.1, 93.8, 91.5, 21.7. Anal Calcd for C<sub>24</sub>H<sub>18</sub>ClNO: C, 77.52; H, 4.88; N, 3.77. Found: C, 77.33; H, 4.81; N, 3.83.

**(E)-4-(2-((2-Aminophenyl)ethynyl)-5-chlorophenyl)but-3-en-2-one (1i)**

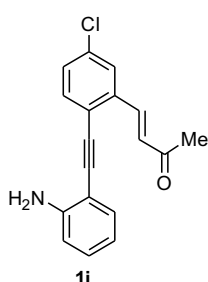

Pale brown solid (0.256 g, 87%); mp: 82-84 °C; IR (KBr): 3451, 2198, 1662, 1493, 1359, 1301, 1254, 1184, 1103 cm<sup>-1</sup>. <sup>1</sup>H NMR (CDCl<sub>3</sub>, 400 MHz) δ 8.08 (d, *J* = 16.3 Hz, 1H), 7.65 (s, 1H), 7.53 (d, *J* = 8.3 Hz, 1H), 7.41-7.35 (m, 2H), 7.20 (t, *J* = 7.8 Hz, 1H), 6.79-6.75 (m, 3H), 4.34 (s, 2H), 2.43 (s, 3H); <sup>13</sup>C NMR (101 MHz, CDCl<sub>3</sub>) δ 198.1, 148.1, 139.9, 136.9, 134.5, 133.7, 132.2, 130.5, 130.1, 129.3, 126.1, 122.1, 118.2, 114.7, 107.1, 93.5, 91.3, 27.8. Anal Calcd for C<sub>18</sub>H<sub>14</sub>ClNO: C, 73.10; H, 4.77; N, 4.74. Found: C, 72.89; H, 4.72; N, 4.83.

**(E)-3-(2-((2-Amino-5-chlorophenyl)ethynyl)phenyl)-1-phenylprop-2-en-1-one (1j)**

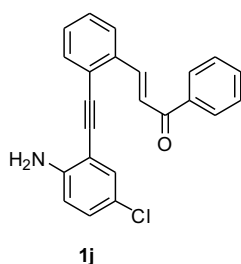

Pale yellow solid (0.279 g, 78%); mp: 146-148 °C; IR (KBr): 3462, 3372, 2167, 1672, 1536, 1319, 1068 cm<sup>-1</sup>. <sup>1</sup>H NMR (CDCl<sub>3</sub>, 400 MHz) δ 8.35 (d, *J* = 15.8 Hz, 1H), 8.03 (d, *J* = 7.5 Hz, 2H), 7.81-7.78 (m, 1H), 7.65-7.60 (m, 3H), 7.51 (t, *J* = 7.5 Hz, 2H), 7.43-7.40 (m, 2H), 7.32 (d, *J* = 1.9 Hz, 1H), 7.12 (dd, *J* = 8.6, 1.9 Hz, 1H), 6.67 (d, *J* = 8.6 Hz, 1H), 4.29 (brs, 2H); <sup>13</sup>C NMR (101 MHz, CDCl<sub>3</sub>) 190.9, 146.8, 142.7, 138.0, 135.9, 132.9, 132.8, 131.4, 130.1, 130.0, 128.8, 128.7, 128.6, 126.6, 124.2, 124.1, 122.2, 115.7, 108.7, 93.3, 91.4. Anal Calcd for C<sub>23</sub>H<sub>16</sub>ClNO: C, 77.20; H, 4.51; N, 3.91. Found: C, 77.02; H, 4.56; N, 3.85.

**(E)-3-(2-((2-Amino-5-chlorophenyl)ethynyl)phenyl)-1-(p-tolyl)prop-2-en-1-one (1k)**

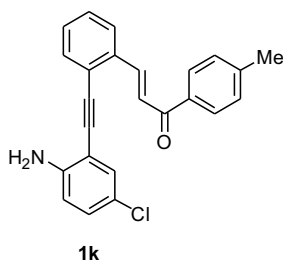

Pale yellow solid (0.372 g, 76%); mp: 130-131 °C; IR (KBr): 3352, 2967, 1681, 1611, 1451, 1322, 1251, 1163, 1042 cm<sup>-1</sup>. <sup>1</sup>H NMR (CDCl<sub>3</sub>, 400 MHz) δ 8.34 (d, *J* = 15.8 Hz, 1H), 7.95 (d, *J* = 8.1 Hz, 2H), 7.80-7.77 (m, 1H), 7.65-7.59 (m, 2H), 7.42-7.38 (m, 2H), 7.33 (d, *J* = 2.3 Hz, 1H), 7.30 (d, *J* = 8.0 Hz, 2H), 7.11 (dd, *J* = 8.6, 2.7 Hz, 1H), 6.67 (d, *J* = 8.6 Hz, 1H), 4.38 (brs, 2H), 2.45 (s, 3H); <sup>13</sup>C NMR (101 MHz, CDCl<sub>3</sub>) δ\* 190.3, 146.9, 143.9, 142.2, 136.0, 135.4, 132.8, 131.4, 130.1, 129.9, 129.4, 128.8, 126.6, 124.1, 124.0, 122.1, 115.7, 108.7, 93.3, 91.4, 21.7. Anal Calcd for C<sub>24</sub>H<sub>18</sub>ClNO: C, 77.52; H, 4.88; N, 3.77. Found: C, 77.32; H, 4.81; N, 3.78.\*One aromatic carbon merged with others.

**(E)-3-(2-((2-Amino-5-chlorophenyl)ethynyl)phenyl)-1-(4-methoxyphenyl)prop-2-en-1-one (1l)**

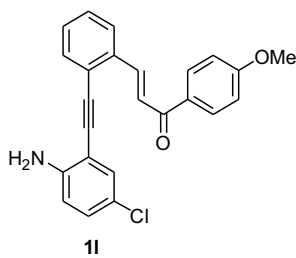

Pale brown solid (0.313 g, 81%); mp: 110-112 °C; IR (KBr): 3370, 3055, 1656, 1604, 1487, 1307, 1260, 1173, 1035 cm<sup>-1</sup>. <sup>1</sup>H NMR (CDCl<sub>3</sub>, 400 MHz) δ 8.33 (d, *J* = 15.8 Hz, 1H), 8.05 (d, *J* = 8.8 Hz, 2H), 7.78-7.76 (m, 1H), 7.67 (d, *J* = 15.8 Hz, 1H), 7.61-7.60 (m, 1H), 7.42-7.39 (m, 2H), 7.35 (d, *J* = 2.4 Hz, 1H), 7.13-7.09 (m, 1H), 6.98 (d, *J* = 8.8 Hz, 2H), 6.67 (d, *J* = 8.8 Hz, 1H), 4.42 (brs, 2H), 3.90 (s, 3H); <sup>13</sup>C NMR (101 MHz, CDCl<sub>3</sub>) δ 188.9, 163.6, 146.9, 141.8, 136.1, 132.8, 132.0, 131.4, 130.9, 130.1, 129.8, 128.8, 126.7, 123.9, 122.1, 115.7, 115.6, 113.9, 108.7, 93.4, 91.3, 55.5. Anal Calcd for C<sub>24</sub>H<sub>18</sub>ClNO<sub>2</sub>: C, 74.32; H, 4.68; N, 3.61. Found: C, 74.11; H, 4.57; N, 3.54.



**(E)-3-(2-((3-Aminonaphthalen-2-yl)ethynyl)phenyl)-1-(4-chlorophenyl)prop-2-en-1-one (1m)**

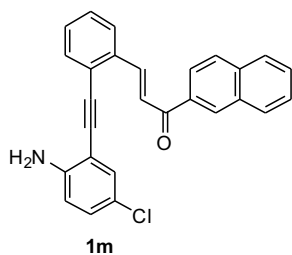

Pale yellow solid (0.318 g, 78%); mp: 127-129 °C; IR (KBr): 3428, 3340, 3055, 2192, 1668, 1476, 1324, 1178, 1021  $\text{cm}^{-1}$ .  $^1\text{H}$  NMR ( $\text{CDCl}_3$ , 400 MHz)  $\delta$  8.55 (s, 1H), 8.44 (d,  $J = 15.8$  Hz, 1H), 8.11 (dd,  $J = 8.6, 1.2$  Hz, 1H), 7.96-7.90 (m, 3H), 7.86-7.82 (m, 2H), 7.64-7.61 (m, 2H), 7.56 (t,  $J = 7.9$  Hz, 1H), 7.44-7.43 (m, 2H), 7.35 (d,  $J = 2.4$  Hz, 1H), 7.11 (dd,  $J = 8.6, 2.4$  Hz, 1H), 6.65 (d,  $J = 8.6$  Hz, 1H), 4.32 (brs, 2H);  $^{13}\text{C}$  NMR (101 MHz,  $\text{CDCl}_3$ )  $\delta^*$  190.4, 146.9, 142.6, 135.9, 135.5, 135.3, 132.9, 132.6, 131.4, 130.2, 130.1, 130.0, 129.6, 128.8, 128.7, 128.5, 127.8, 126.9, 124.5, 124.2, 123.9, 122.2, 115.8, 108.7, 93.3, 91.5. Anal Calcd for  $\text{C}_{27}\text{H}_{18}\text{ClNO}$ : C, 79.50; H, 4.45; N, 3.43. Found: C, 79.41; H, 4.32; N, 3.48. \* One aromatic carbon merged with others.

**(E)-3-(2-((2-Amino-5-chlorophenyl)ethynyl)phenyl)-1-(thiophen-2-yl)prop-2-en-1-one (1n)**

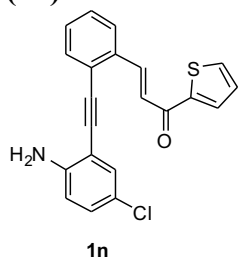

Pale brown solid (0.232 g, 64%); mp: 149-151 °C; IR (KBr): 3381, 2921, 1650, 1575, 1487, 1423, 1324, 1231, 1062  $\text{cm}^{-1}$ .  $^1\text{H}$  NMR ( $\text{CDCl}_3$ , 400 MHz)  $\delta$  8.42 (d,  $J = 15.7$  Hz, 1H), 7.89-7.88 (m, 1H), 7.80-7.78 (m, 1H), 7.72-7.71 (m, 1H), 7.62-7.60 (m, 1H), 7.53 (d,  $J = 15.6$  Hz, 1H), 7.43-7.41 (m, 2H), 7.37 (d,  $J = 1.6$  Hz, 1H), 7.20 (t,  $J = 2.1$  Hz, 1H), 7.12 (dd,  $J = 8.6, 1.5$  Hz, 1H), 6.68 (d,  $J = 8.6$  Hz, 1H), 4.46 (s, 2H);  $^{13}\text{C}$  NMR (101 MHz,  $\text{CDCl}_3$ )  $\delta$  182.2, 146.9, 145.3, 141.9, 135.7, 134.2, 132.8, 132.1, 131.4, 130.2, 130.1, 128.7, 128.4, 126.6, 124.3, 123.3, 122.1, 115.7, 108.7, 93.2, 91.6. Anal Calcd for  $\text{C}_{21}\text{H}_{14}\text{ClNOS}$ : C, 69.32; H, 3.88; N, 3.85. Found: C, 69.08; H, 3.80; N, 3.77.

**(E)-3-(2-((2-Amino-5-methylphenyl)ethynyl)phenyl)-1-(furan-2-yl)prop-2-en-1-one (1o)**

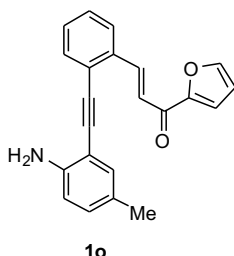

Pale brown solid (0.288 g, 88%); mp: 166-168 °C; IR (KBr): 3371, 3065, 2903, 1642, 1561, 1479, 1402, 1314, 1222, 1058  $\text{cm}^{-1}$ .  $^1\text{H}$  NMR ( $\text{CDCl}_3$ , 400 MHz)  $\delta$  8.49 (d,  $J = 15.8$  Hz, 1H), 7.78 (d,  $J = 8.7$  Hz, 1H), 7.66 (s, 1H), 7.61-7.56 (m, 2H), 7.40-7.38 (m, 2H), 7.35 (d,  $J = 3.1$  Hz, 1H), 7.25 (s, 1H), 7.00 (d,  $J = 7.9$  Hz, 1H), 6.68 (d,  $J = 8.2$  Hz, 1H), 6.60-6.59 (m, 1H), 4.31 (s, 2H), 2.26 (s, 3H);  $^{13}\text{C}$  NMR (101 MHz,  $\text{CDCl}_3$ )  $\delta$  178.1, 153.6, 146.7, 146.0, 142.1, 135.5, 132.7, 132.4, 131.1, 130.1, 128.3, 127.1, 126.7, 124.9, 122.83, 117.8, 114.8, 112.6, 107.5, 93.3, 92.2, 20.3. Anal Calcd for  $\text{C}_{22}\text{H}_{17}\text{NO}_2$ : C, 80.71; H, 5.23; N, 4.28. Found: C, 80.42; H, 5.12; N, 4.27.

**(E)-3-(2-((2-Amino-5-(trifluoromethyl)phenyl)ethynyl)phenyl)-1-(naphthalen-2-yl)prop-2-en-1-one (1p)**

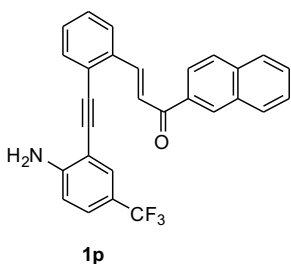

Pale brown solid (0.313 g, 71%); mp: 153-155 °C; IR (KBr): 3480, 3364, 1656, 1615, 1586, 1342, 1173, 1143, 1085  $\text{cm}^{-1}$ .  $^1\text{H}$  NMR ( $\text{CDCl}_3$ , 400 MHz)  $\delta$  8.55 (s, 1H), 8.44 (d,  $J = 15.7$  Hz, 1H), 8.11 (d,  $J = 8.5$  Hz, 1H), 7.95-7.89 (m, 3H), 7.86-7.81 (m, 2H), 7.65-7.61 (m, 3H), 7.55 (t,  $J = 7.8$  Hz, 1H), 7.45-7.43 (m, 2H), 7.38 (d,  $J = 8.5$  Hz, 1H), 6.74 (d,  $J = 8.5$  Hz, 1H), 4.74 (s, 2H);  $^{13}\text{C}$  NMR (101 MHz,  $\text{CDCl}_3$ )  $\delta^*$  190.2, 150.7, 142.5, 135.9, 135.6, 135.3, 132.9, 132.5, 130.2, 130.1, 129.6 (q,  $J = 3.0$  Hz), 129.5, 128.9, 128.7, 128.6, 127.8, 126.9 (q,  $J = 4.0$  Hz), 126.9, 126.7, 124.4, 124.1, 123.9, 119.7 (q,  $J = 33.3$  Hz), 113.9, 106.9, 93.3, 91.2. Anal Calcd for  $\text{C}_{28}\text{H}_{18}\text{F}_3\text{NO}$ : C, 76.18; H, 4.11; N, 3.17. Found: C, 75.96; H, 4.16; N, 3.21. \*One aromatic carbon merged with others.

**(E)-3-(2-((2-Amino-5-(trifluoromethyl)phenyl)ethynyl)-5-chlorophenyl)-1-phenylprop-2-en-1-one (1q)**

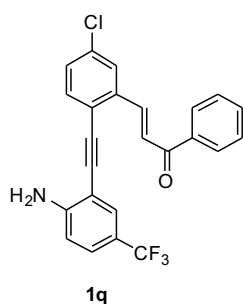

1q  
Pale yellow solid (0.293 g, 69%); mp: 131-133 °C; IR (KBr): 3055, 2373, 2315, 1843, 1720, 1493, 1423, 1377, 1190  $\text{cm}^{-1}$ .  $^1\text{H}$  NMR ( $\text{CDCl}_3$ , 400 MHz)  $\delta$  8.29 (d,  $J = 15.8$  Hz, 1H), 8.04 (d,  $J = 7.4$  Hz, 2H), 7.76 (d,  $J = 1.0$  Hz, 1H), 7.63-7.59 (m, 3H), 7.55-7.50 (m, 3H), 7.38 (d,  $J = 8.2$  Hz, 2H), 6.77 (d,  $J = 8.4$  Hz, 1H), 4.75 (s, 2H);  $^{13}\text{C}$  NMR (101 MHz,  $\text{CDCl}_3$ )  $\delta^*$  190.1, 150.7, 141.0, 137.7, 137.4, 134.9, 133.8, 133.2, 130.1, 129.7 (q,  $J = 4.0$  Hz), 128.8, 128.6, 127.1 (q,  $J = 3.0$  Hz), 126.4, 124.8, 122.5, 119.7 (q,  $J = 33.3$  Hz), 114.1, 106.5, 92.2, 92.1. Anal Calcd for  $\text{C}_{24}\text{H}_{15}\text{ClF}_3\text{NO}$ : C, 67.69; H, 3.55; N, 3.29. Found: C, 67.61; H, 3.48; N, 3.29. \*One aromatic carbon merged with others.

**(E)-3-(2-((2-Amino-5-(trifluoromethyl)phenyl)ethynyl)-5-chlorophenyl)-1-(4-chlorophenyl)prop-2-en-1-one (1r)**

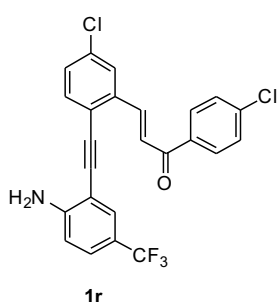

1r  
Pale yellow solid (0.193 g, 70%); mp: 175-177 °C; IR (KBr): 3358, 2204, 1750, 1598, 1476, 1318, 1155, 1091, 1009  $\text{cm}^{-1}$ .  $^1\text{H}$  NMR ( $\text{CDCl}_3$ , 400 MHz)  $\delta$  8.31 (d,  $J = 15.7$  Hz, 1H), 7.99 (d,  $J = 8.5$  Hz, 2H), 7.75 (d,  $J = 1.7$  Hz, 1H), 7.64-7.54 (m, 3H), 7.48 (d,  $J = 8.5$  Hz, 2H), 7.40 (dd,  $J = 8.4, 1.8$  Hz, 2H), 6.78 (d,  $J = 8.5$  Hz, 1H), 4.74 (s, 2H);  $^{13}\text{C}$  NMR (101 MHz,  $\text{CDCl}_3$ )  $\delta^*$  188.6, 150.6, 141.5, 139.8, 137.2, 135.9, 134.9, 133.9, 130.3, 129.9, 129.7 (q,  $J = 4.0$  Hz), 129.1, 127.2 (q,  $J = 4.0$  Hz), 126.4, 124.0, 122.6, 119.8 (q,  $J = 33.3$  Hz), 114.1, 106.5, 92.2, 92.1. Anal Calcd for  $\text{C}_{24}\text{H}_{14}\text{Cl}_2\text{F}_3\text{NO}$ : C, 62.63; H, 3.07; N, 3.04. Found: C, 62.44; H, 3.01; N, 2.98. \*One aromatic carbon merged with others.

**Methyl (E/Z)-3-(2-((2-aminophenyl)ethynyl)phenyl)acrylate (1s)**

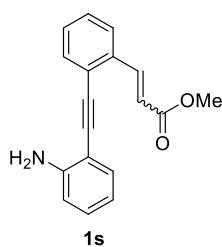

1s  
*Trans:cis* = 1:0.31; Yellow oil (0.199 g, 64%); IR (KBr): 3362, 3079, 1681, 1662, 1479, 1322, 1239, 1181, 1049  $\text{cm}^{-1}$ .  $^1\text{H}$  NMR ( $\text{CDCl}_3$ , 400 MHz)  $\delta$  8.33 (d,  $J = 16.0$  Hz, *trans*, 1H); 7.67-7.56 (m, *trans* & *cis*, 5H), 7.45-7.33 (m, *trans* & *cis*, 6H), 7.20-7.15 (m, *trans* & *cis*, 2H); 6.77-6.74 (m, *trans* & *cis*, 4H), 6.56 (d,  $J = 16.1$  Hz, *trans*, 1H), 6.11 (d,  $J = 12.4$  Hz, *cis*, 1H);  $^{13}\text{C}$  NMR (101 MHz,  $\text{CDCl}_3$ )  $\delta^*$  167.4, 166.4, 148.1, 147.9, 142.8, 142.4, 136.8, 135.2, 132.6, 132.4, 132.2, 131.8, 130.2, 130.0, 129.9, 129.3, 128.6, 128.4, 127.7, 126.2, 124.3, 122.9, 114.6, 114.4, 107.7, 107.5, 92.9, 92.6, 92.2, 91.4, 51.8, 51.5. Anal Calcd for  $\text{C}_{18}\text{H}_{15}\text{NO}_2$ : C, 77.96; H, 5.45; N, 5.05. Found: C, 77.61; H, 5.34; N, 4.98. \*Four aromatic carbons merged with others.

**Methyl (E)-3-(2-((2-amino-5-chlorophenyl)ethynyl)phenyl)acrylate (1t)**

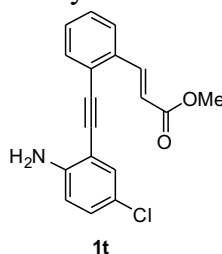

1t  
Pale yellow solid (0.237 g, 76%); mp: 124-126 °C; IR (KBr): 3352, 3061, 1671, 1642, 1467, 1310, 1228, 1161, 1029  $\text{cm}^{-1}$ .  $^1\text{H}$  NMR ( $\text{CDCl}_3$ , 400 MHz)  $\delta$  8.28 (d,  $J = 16.0$  Hz, 1H), 7.67-7.65 (m, 1H), 7.59-7.56 (m, 1H), 7.40-7.37 (m, 3H), 7.12 (dd,  $J = 8.6, 2.4$  Hz, 1H), 6.68 (d,  $J = 8.7$  Hz, 1H), 6.54 (d,  $J = 16.1$  Hz, 1H), 4.25 (brs, 2H), 3.84 (s, 3H);  $^{13}\text{C}$  NMR (101 MHz,  $\text{CDCl}_3$ )  $\delta$  167.3, 146.7, 142.6, 135.4, 132.6, 131.5, 130.1, 129.9, 128.8, 126.2, 123.8, 122.2, 119.6, 115.7, 108.8, 93.1, 91.2, 51.9. Anal Calcd for  $\text{C}_{18}\text{H}_{14}\text{ClNO}_2$ : C, 69.35; H, 4.53; N, 4.49. Found: C, 69.03; H, 4.43; N, 4.52.

**6. Optimization Table** (Additional Entries)**Table S1.** Optimization of the reaction conditions to access indene-fused indole **2a**

| <b>Entry</b> | <b>Catalyst<br/>(10 mol%)</b> | <b>Solvent</b> | <b>Temp.<br/>(°C)</b> | <b>Time<br/>(min)</b> | <b>Yield of<br/>2a (%)<sup>b</sup></b> | <b>Yield of<br/>3a (%)<sup>c</sup></b> |
|--------------|-------------------------------|----------------|-----------------------|-----------------------|----------------------------------------|----------------------------------------|
| 1            | PdCl <sub>2</sub>             | THF            | 25                    | 24 h                  | 27                                     | 33                                     |
| 2            | PdCl <sub>2</sub>             | Dioxane        | 25                    | 36 h                  | 39                                     | 32                                     |
| 3            | PdCl <sub>2</sub>             | DCM            | 25                    | 48 h                  | trace                                  | 41                                     |
| 4            | PdCl <sub>2</sub>             | DCE            | 25                    | 24 h                  | 29                                     | 21                                     |
| 5            | PdCl <sub>2</sub>             | Toluene        | 25                    | 48 h                  | -                                      | -                                      |
| 6            | PdCl <sub>2</sub>             | DMSO           | 25                    | 24 h                  | 49                                     | 22                                     |
| 7            | PdCl <sub>2</sub>             | MeCN           | 25                    | 36 h                  | 51                                     | 25                                     |

## 7. Copies of $^1\text{H}$ and $^{13}\text{C}$ NMR Spectra

$^1\text{H}$  NMR spectrum of compound **S3g** ( $\text{CDCl}_3$ , 400 MHz)

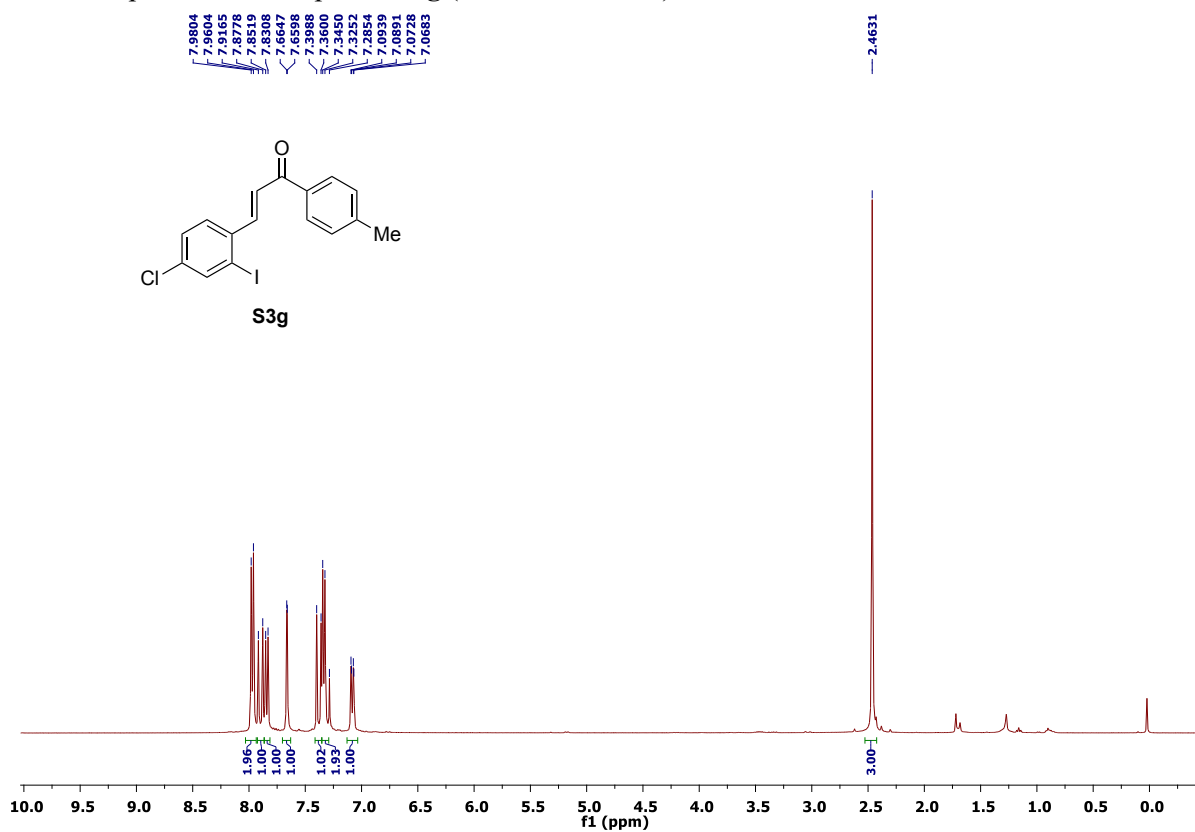

$^{13}\text{C}\{^1\text{H}\}$  NMR spectrum of compound **S3g** ( $\text{CDCl}_3$ , 101 MHz)

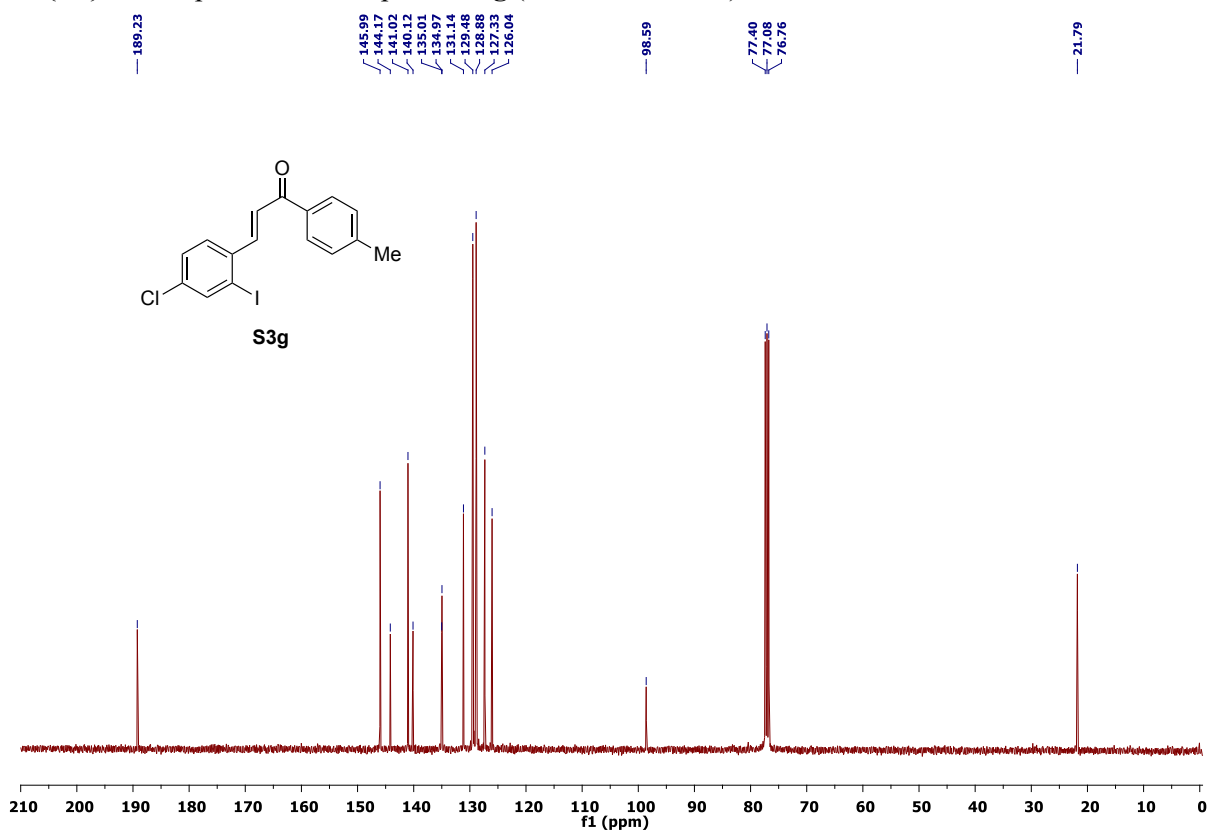

$^1\text{H}$  NMR spectrum of compound **S3h** ( $\text{CDCl}_3$ , 400 MHz)

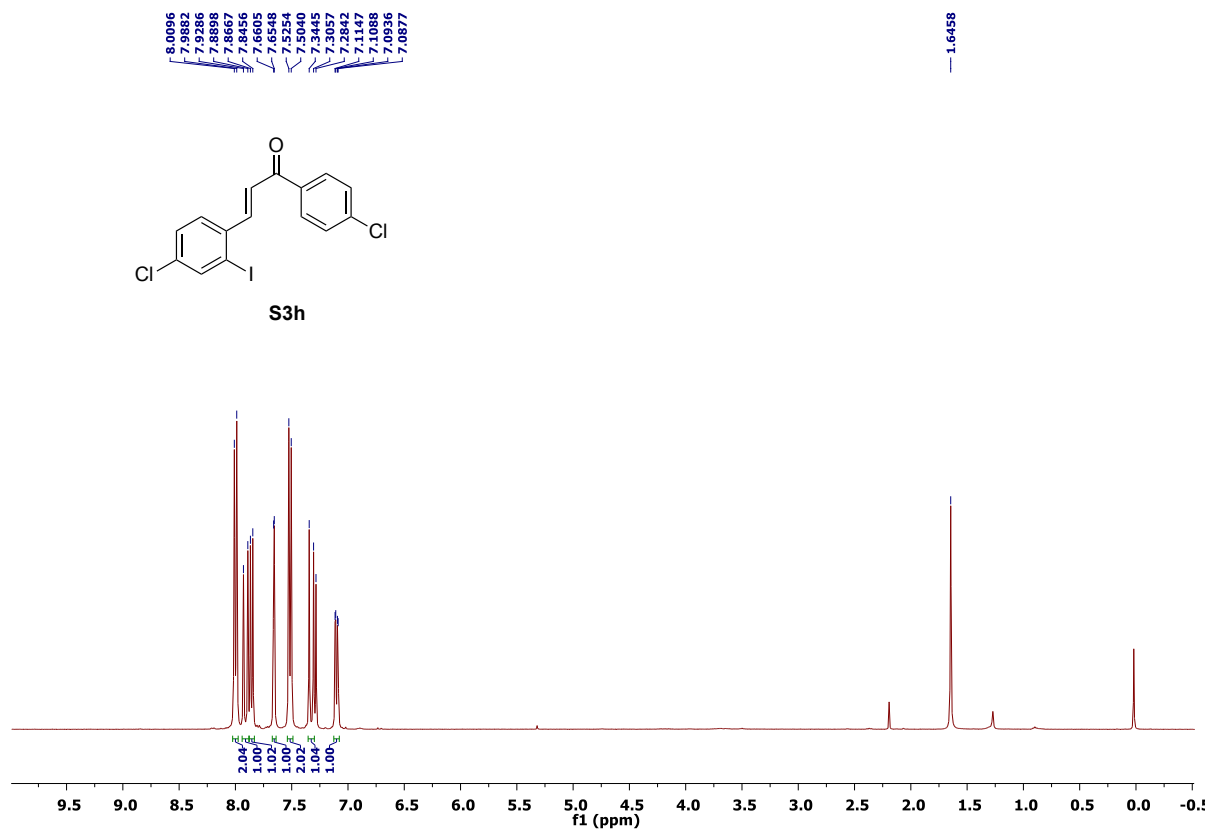

$^{13}\text{C}\{^1\text{H}\}$  NMR spectrum of compound **S3h** ( $\text{CDCl}_3$ , 101 MHz)

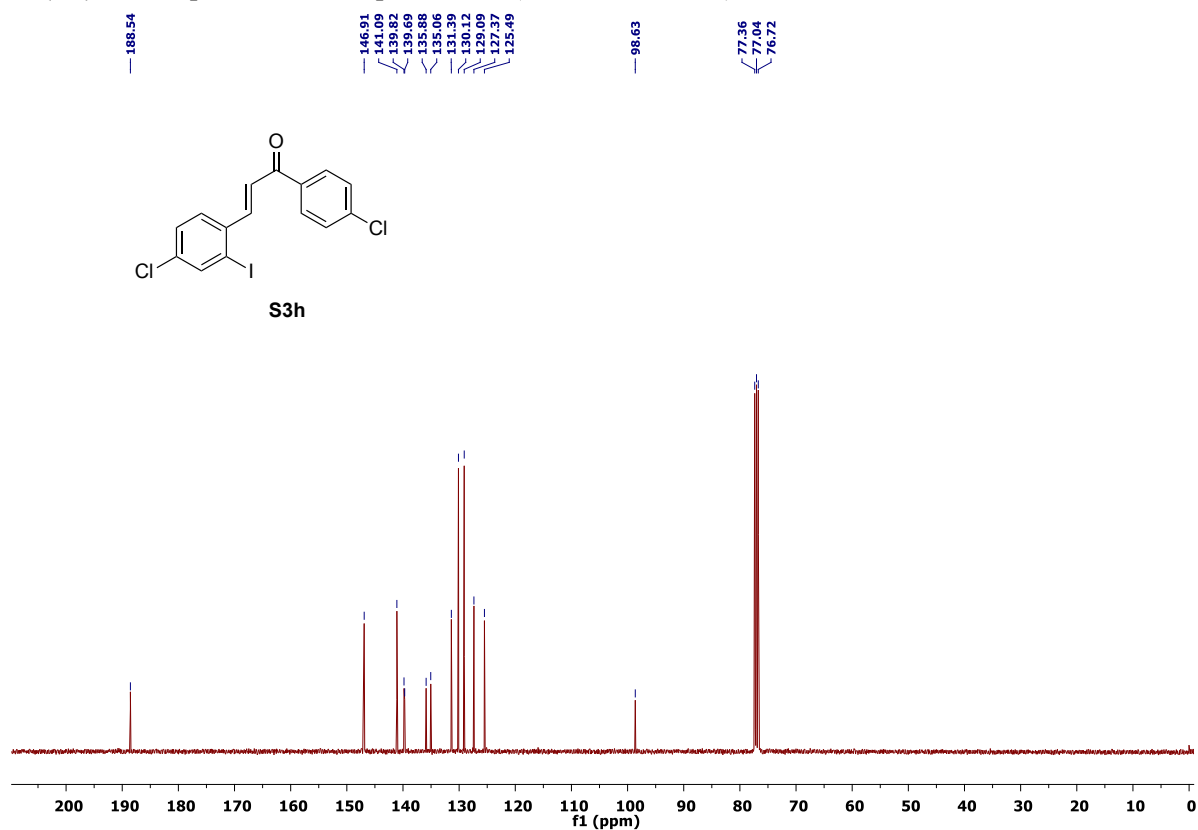

<sup>1</sup>H NMR spectrum of compound **S3i** (CDCl<sub>3</sub>, 400 MHz)

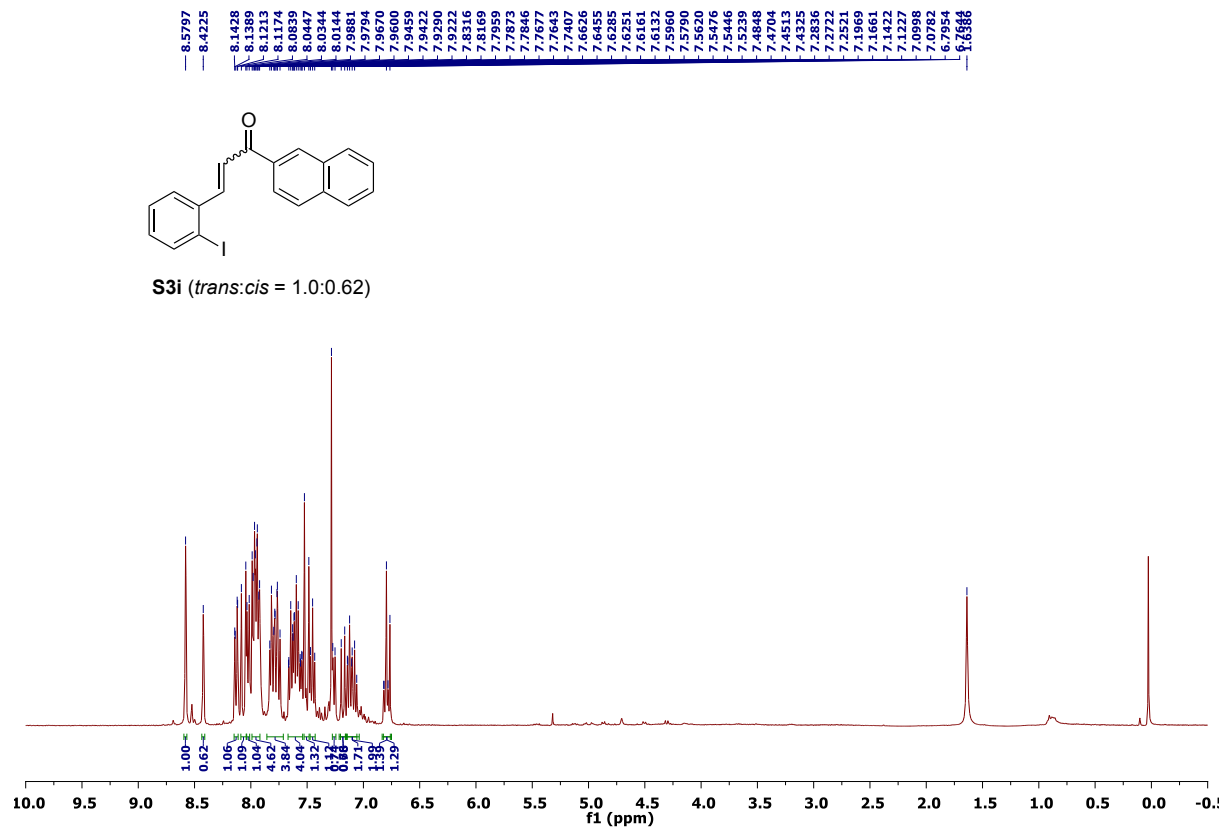

<sup>13</sup>C{<sup>1</sup>H} NMR spectrum of compound **S3i** (CDCl<sub>3</sub>, 101 MHz)

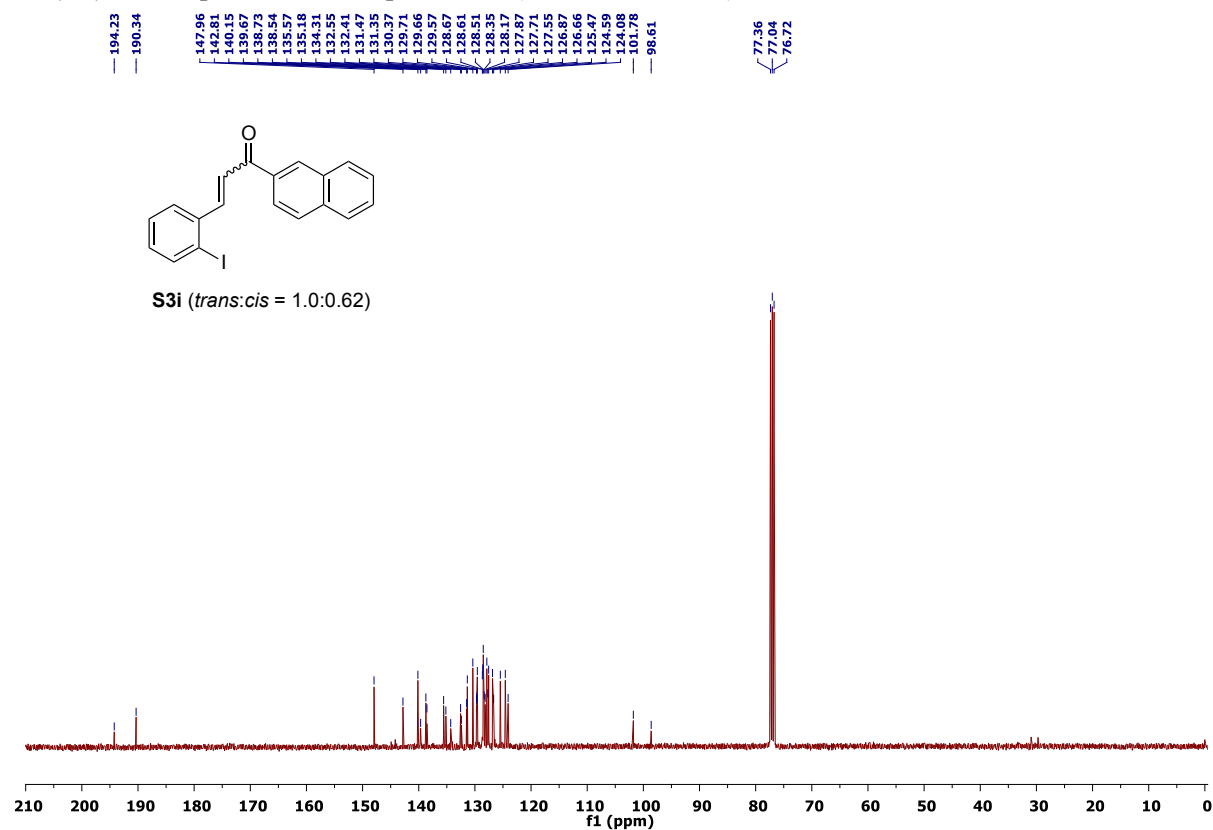

$^1\text{H}$  NMR spectrum of compound **S3j** ( $\text{CDCl}_3$ , 400 MHz)

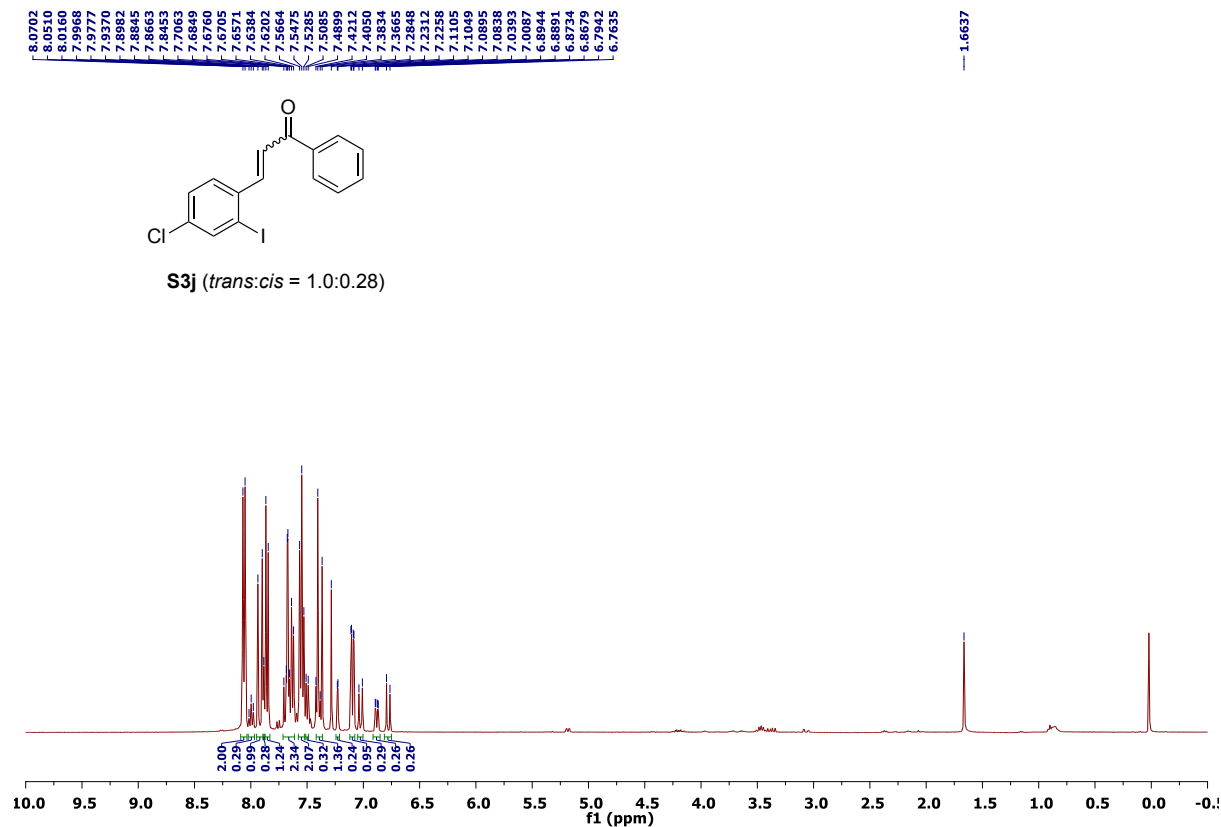

$^{13}\text{C}\{^1\text{H}\}$  NMR spectrum of compound **S3j** ( $\text{CDCl}_3$ , 101 MHz)

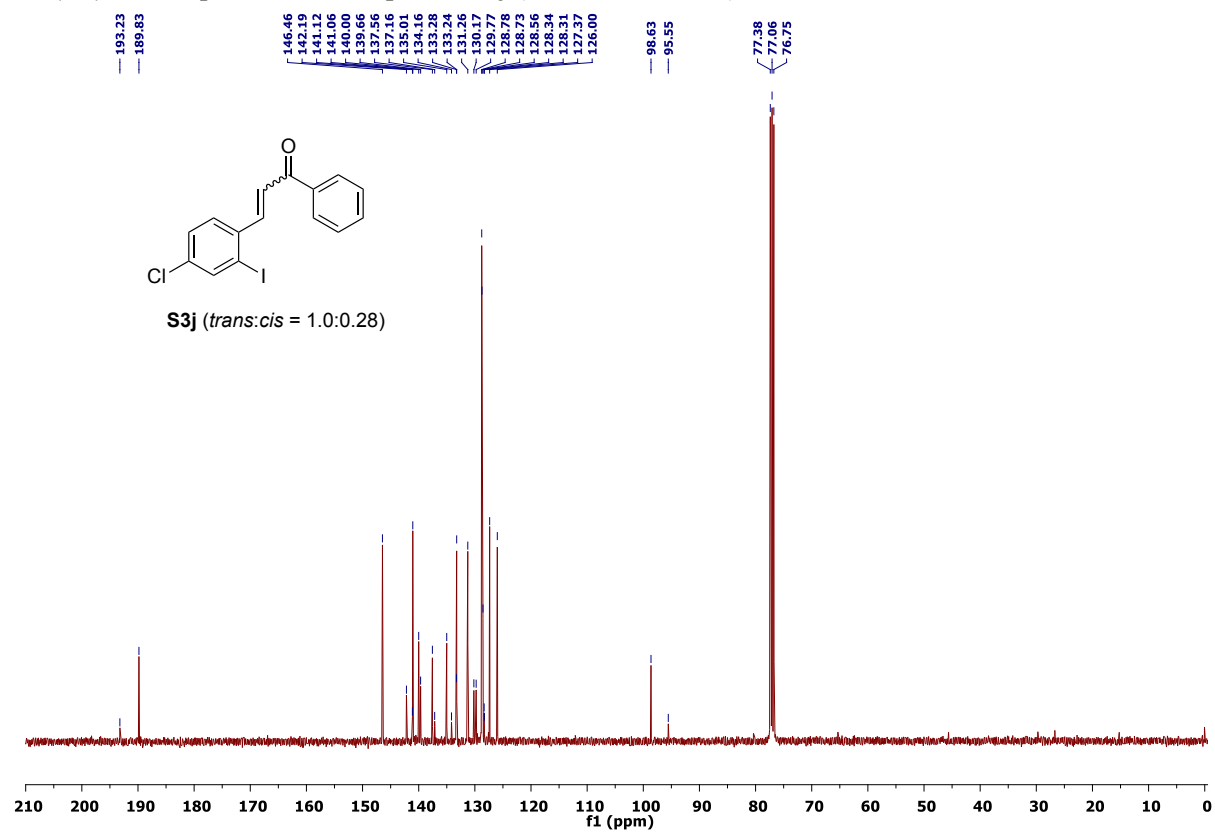

$^1\text{H}$  NMR spectrum of compound **S3m** ( $\text{CDCl}_3$ , 400 MHz)

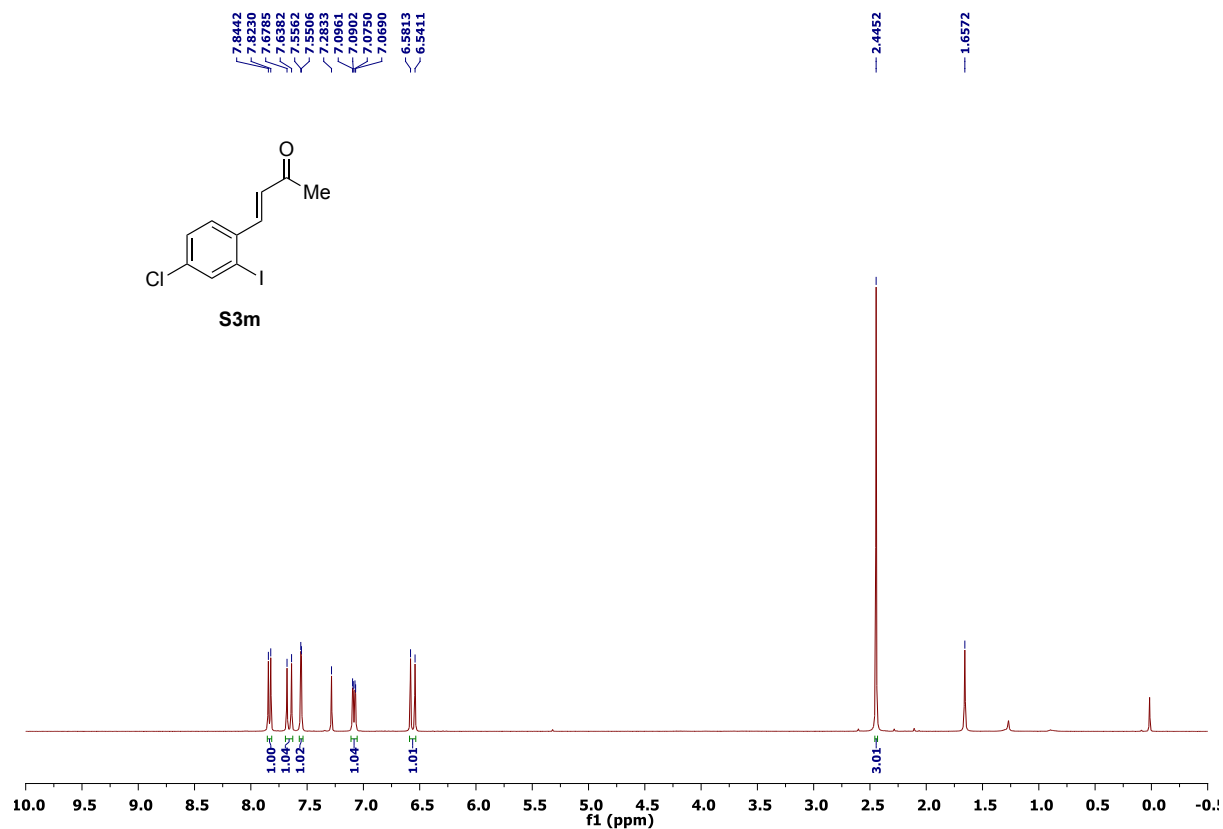

$^{13}\text{C}\{^1\text{H}\}$  NMR spectrum of compound **S3m** ( $\text{CDCl}_3$ , 101 MHz)

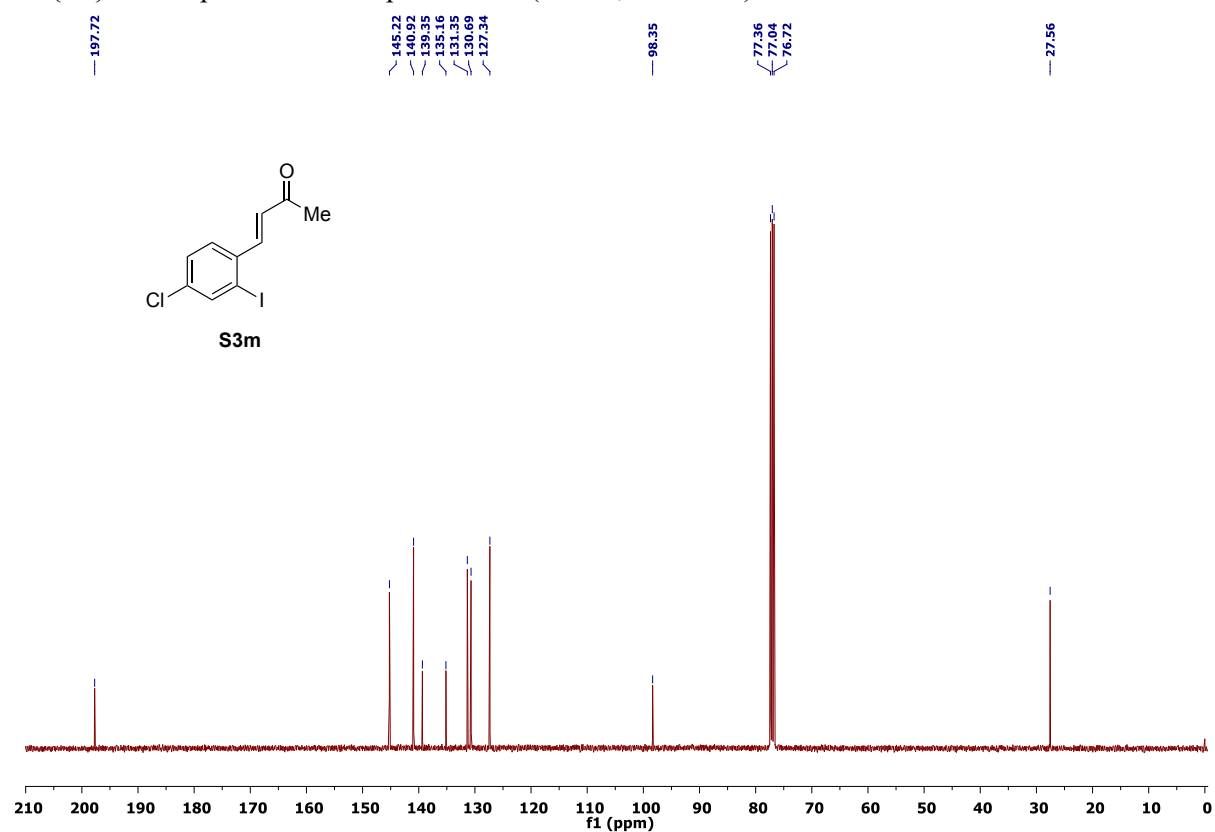



$^1\text{H}$  NMR spectrum of compound **1a** ( $\text{CDCl}_3$ , 400 MHz)

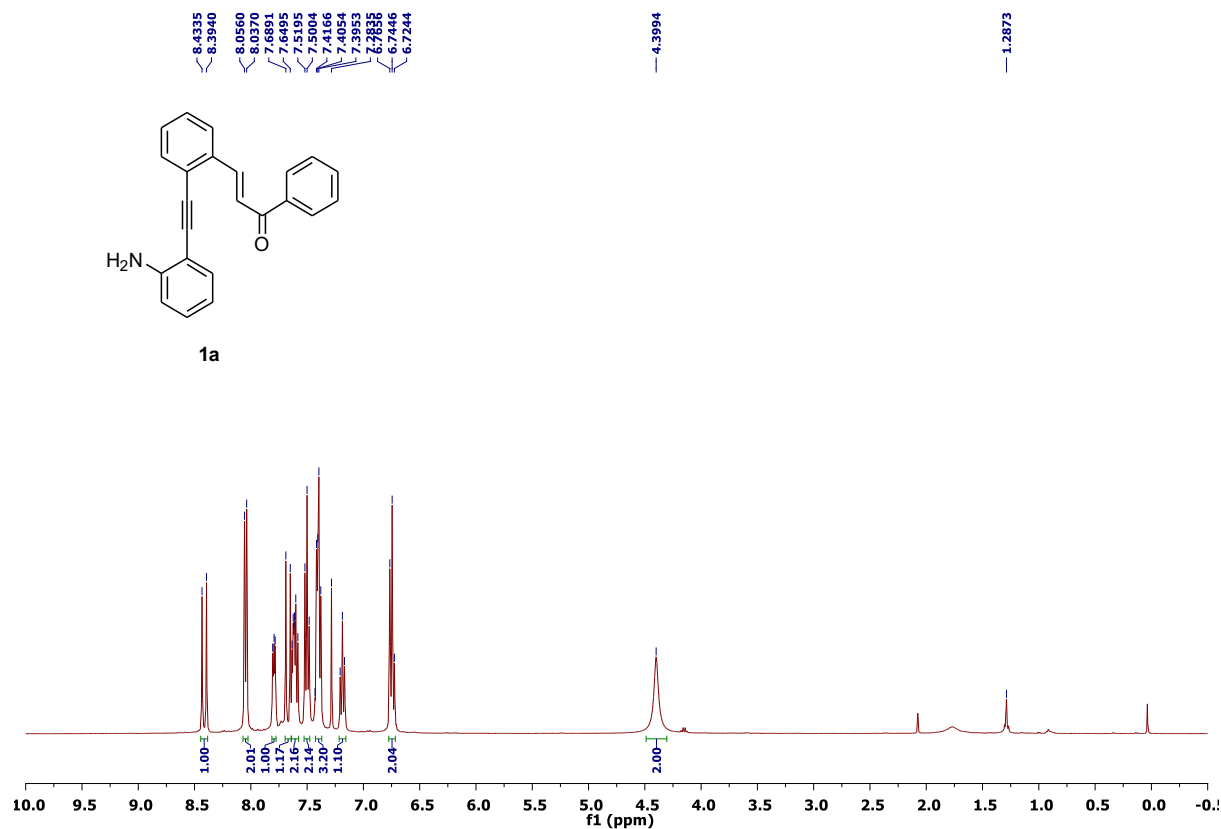

$^{13}\text{C}\{^1\text{H}\}$  NMR spectrum of compound **1a** ( $\text{CDCl}_3$ , 101 MHz)

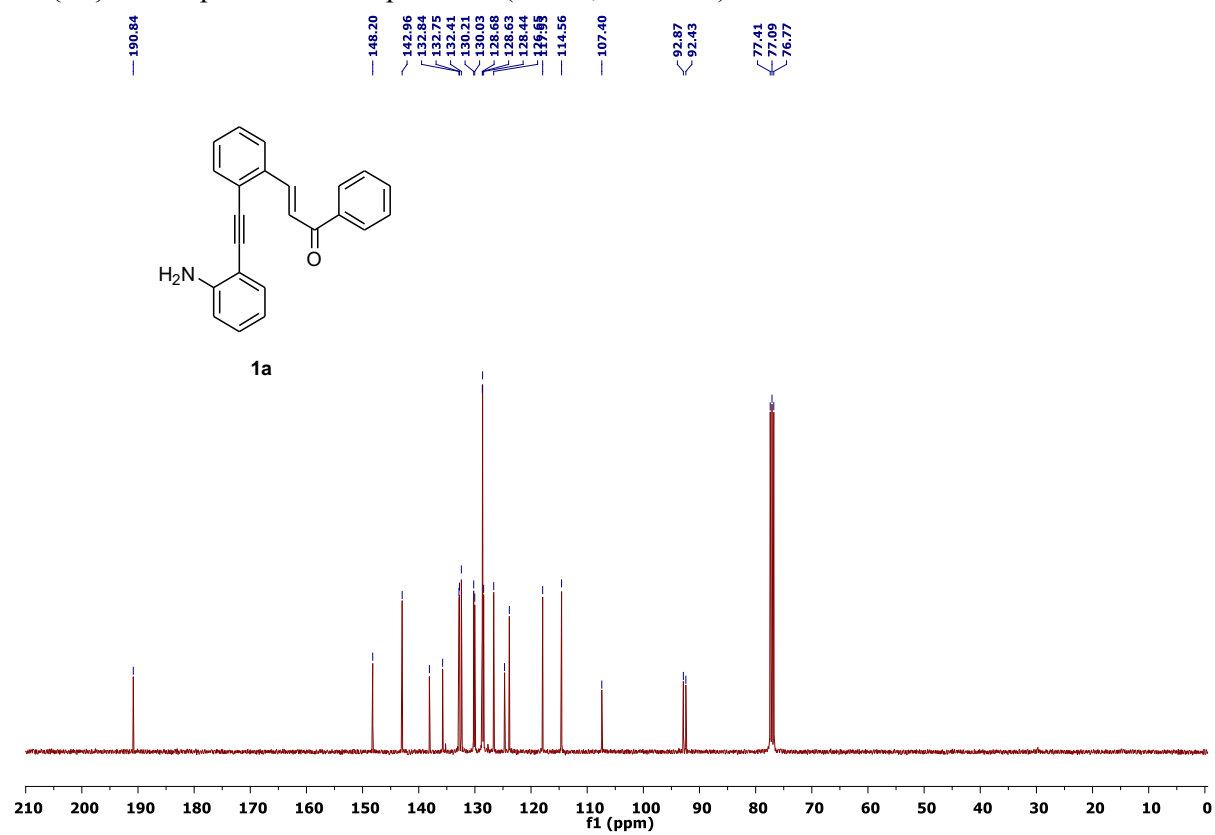

$^1\text{H}$  NMR spectrum of compound **1b** ( $\text{CDCl}_3$ , 400 MHz)

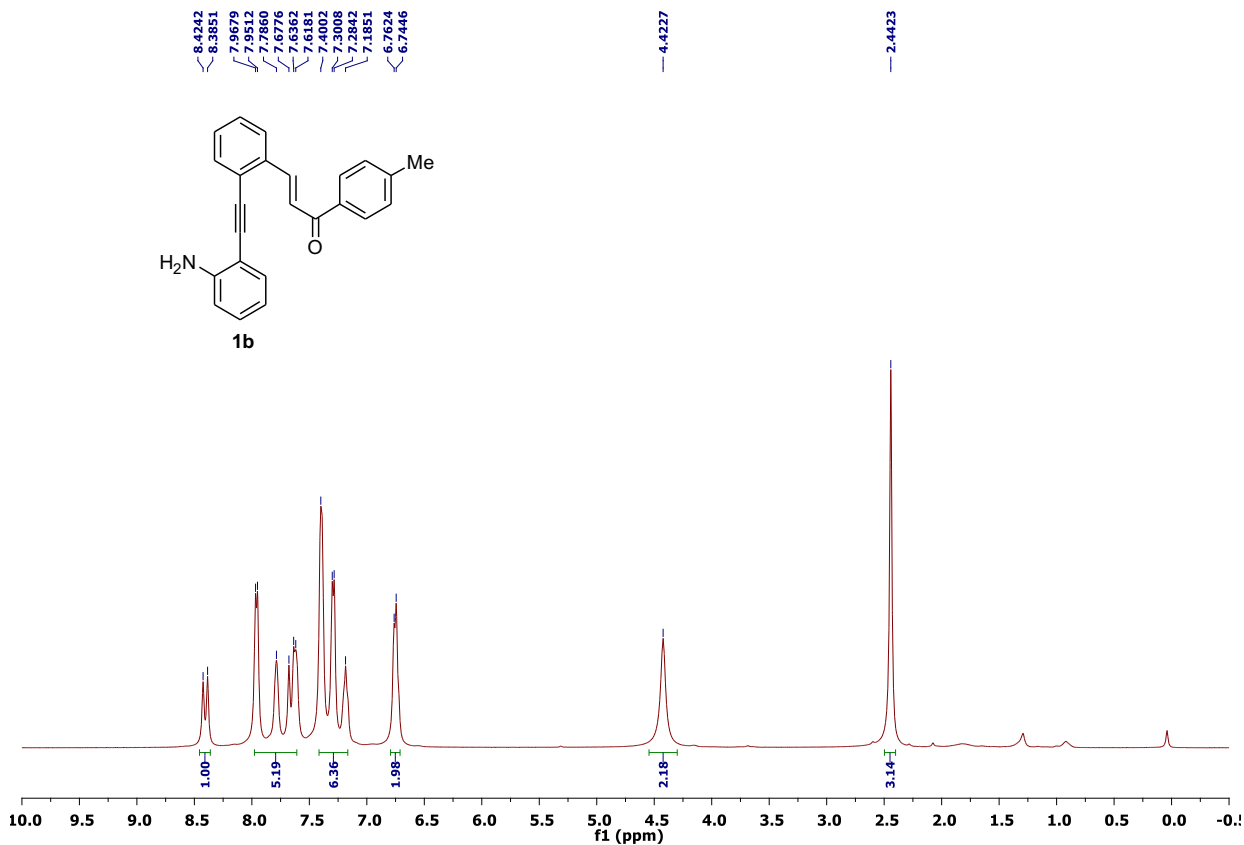

$^{13}\text{C}\{^1\text{H}\}$  NMR spectrum of compound **1b** ( $\text{CDCl}_3$ , 101 MHz)

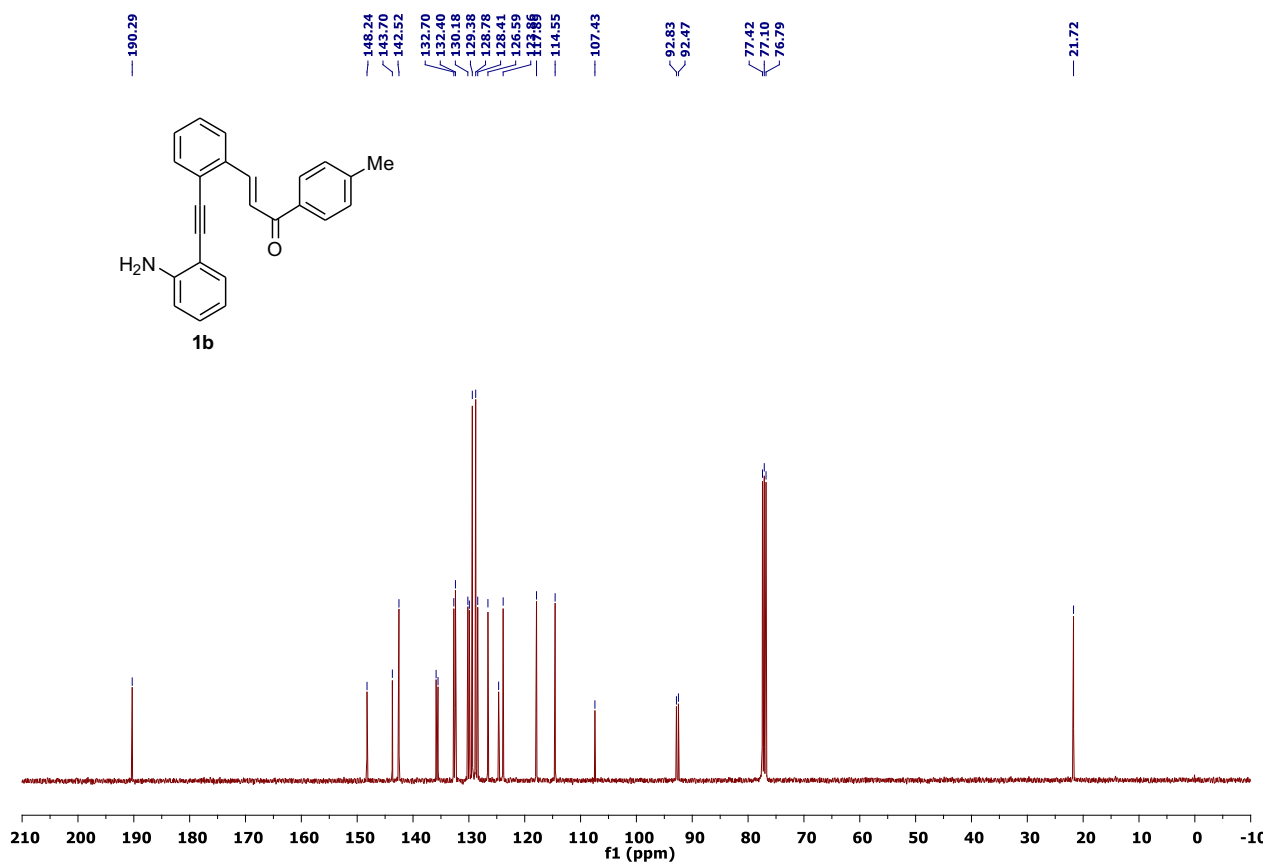

$^1\text{H}$  NMR spectrum of compound **1c** ( $\text{CDCl}_3$ , 400 MHz)

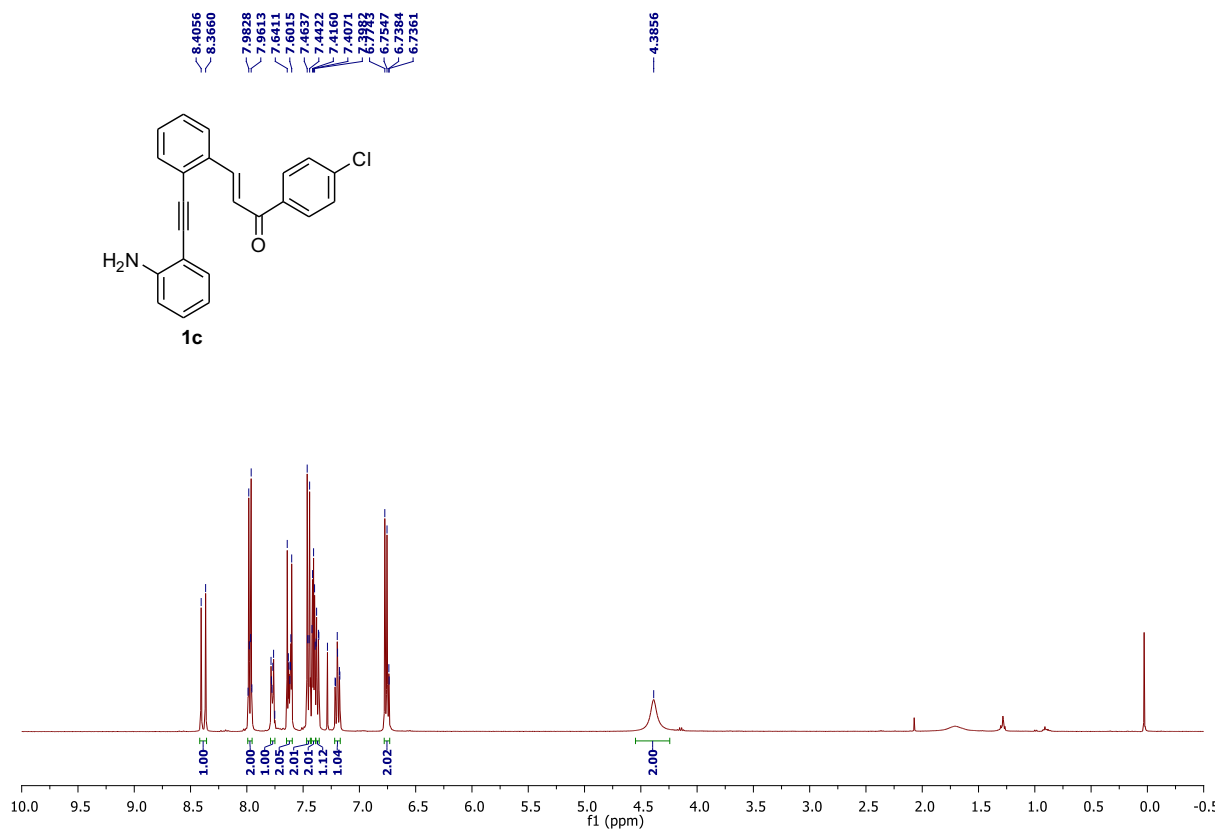

$^{13}\text{C}\{^1\text{H}\}$  NMR spectrum of compound **1c** ( $\text{CDCl}_3$ , 101 MHz)

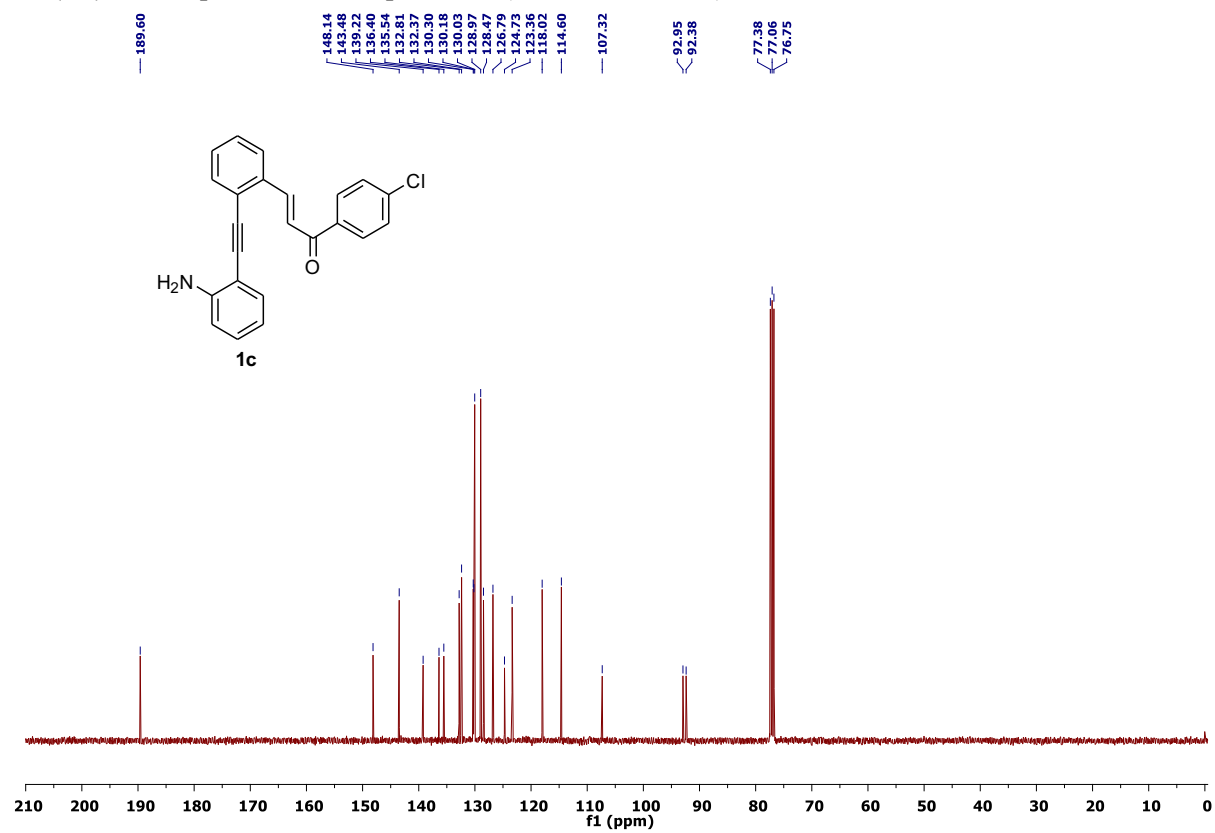

$^1\text{H}$  NMR spectrum of compound **1d** ( $\text{CDCl}_3$ , 400 MHz)

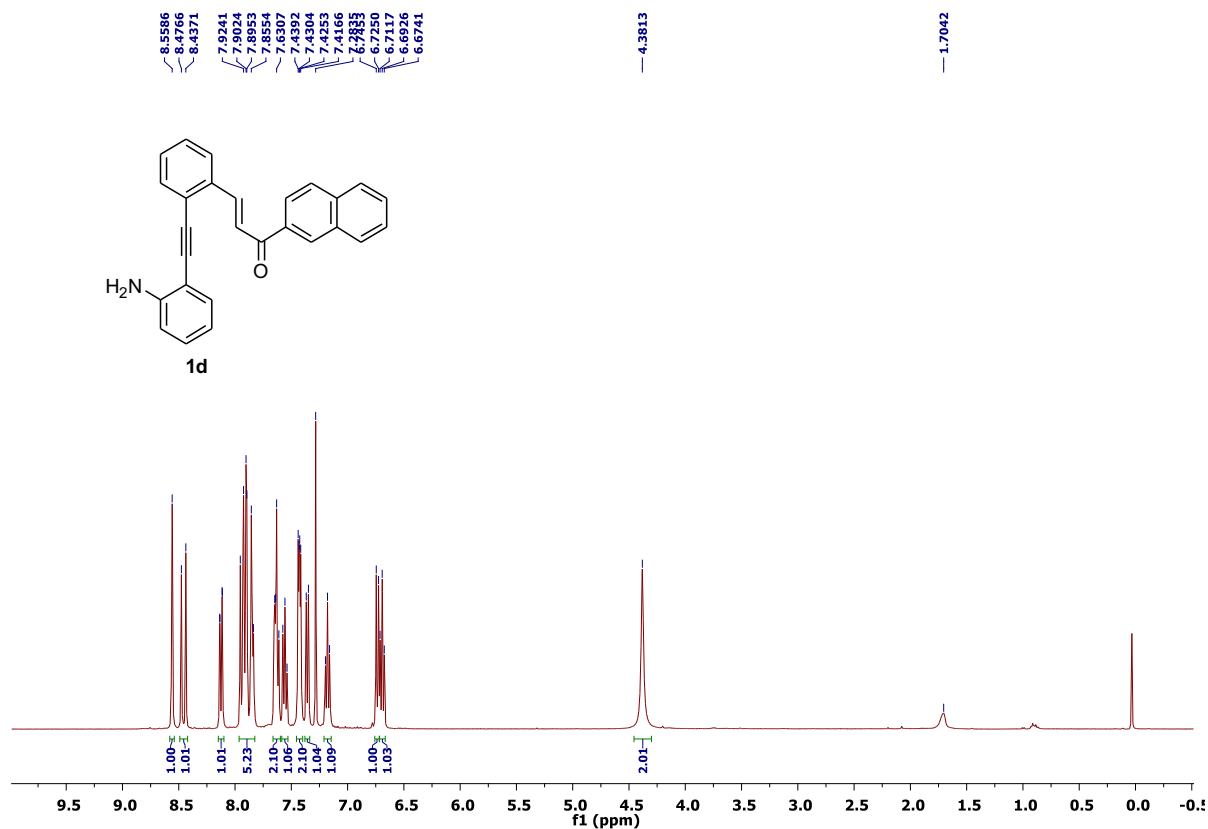

$^{13}\text{C}\{^1\text{H}\}$  NMR spectrum of compound **1d** ( $\text{CDCl}_3$ , 101 MHz)

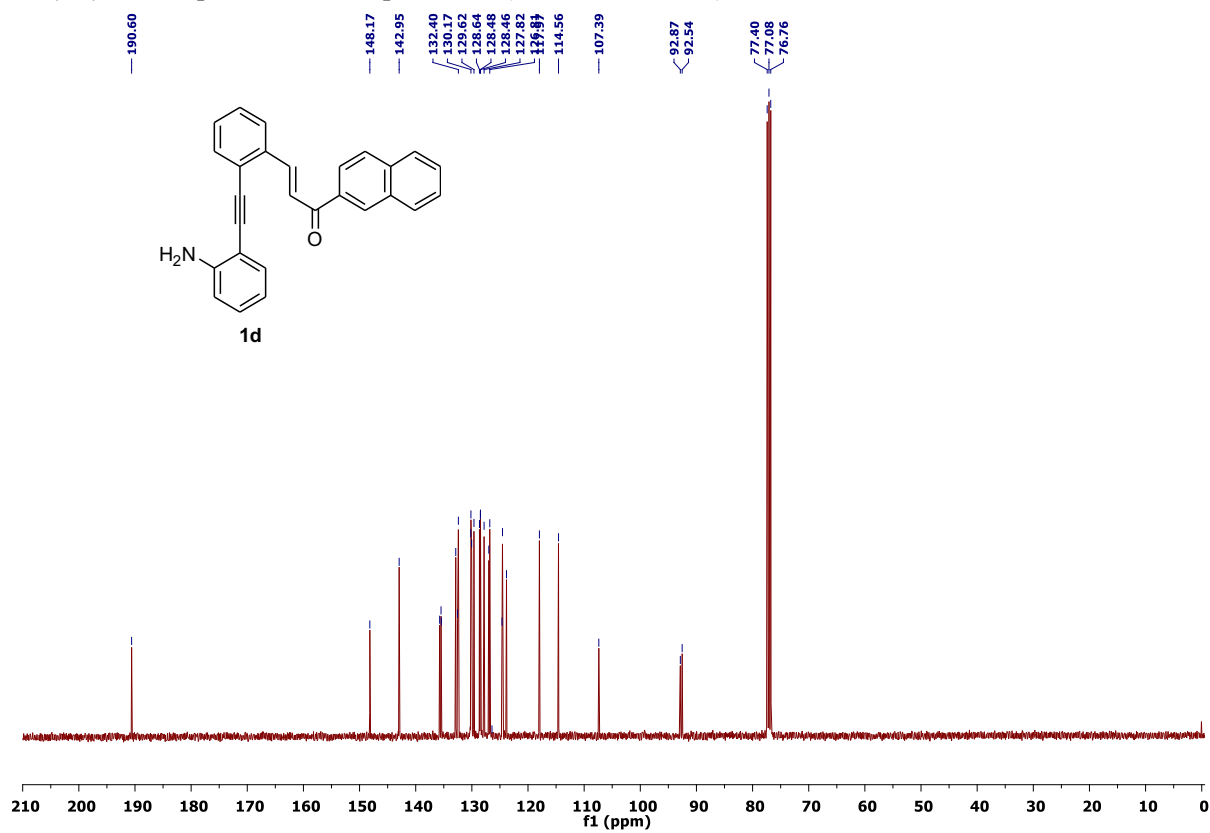

$^1\text{H}$  NMR spectrum of compound **1e** ( $\text{CDCl}_3$ , 400 MHz)

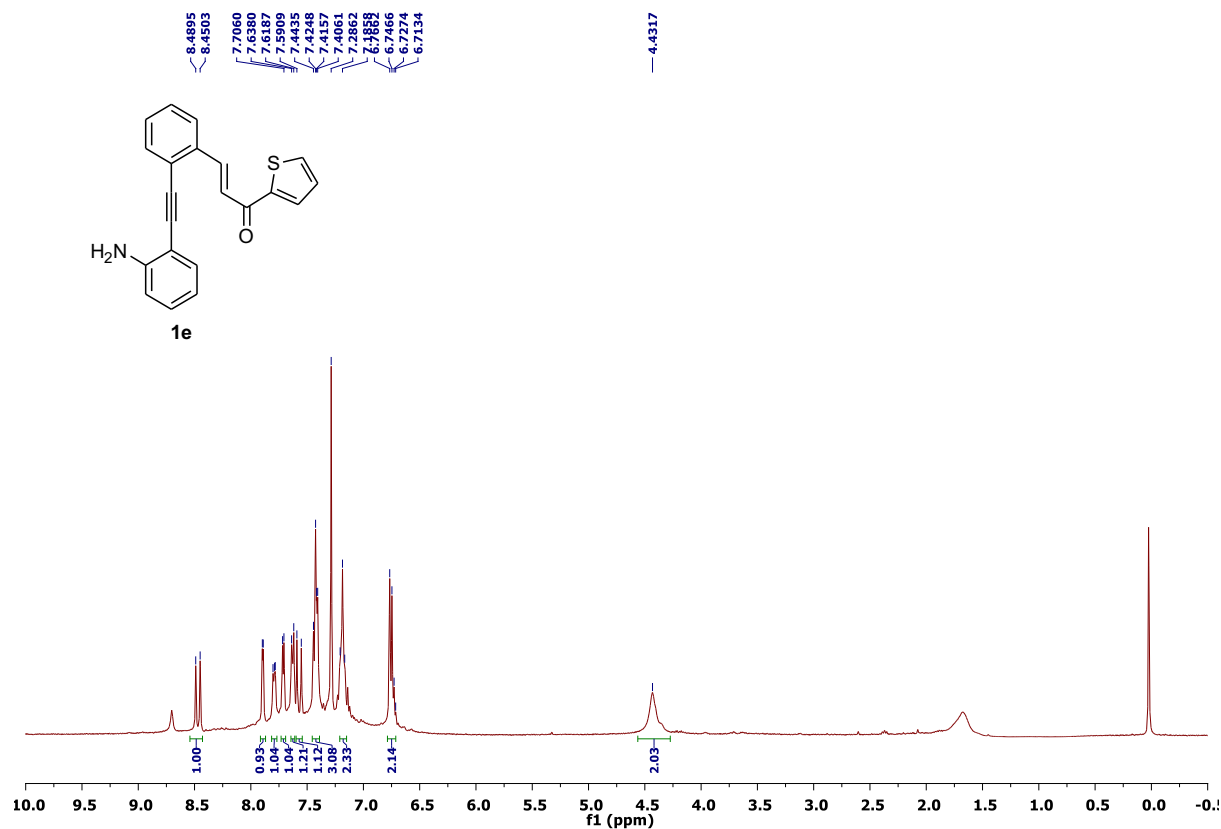

$^{13}\text{C}\{^1\text{H}\}$  NMR spectrum of compound **1e** ( $\text{CDCl}_3$ , 101 MHz)

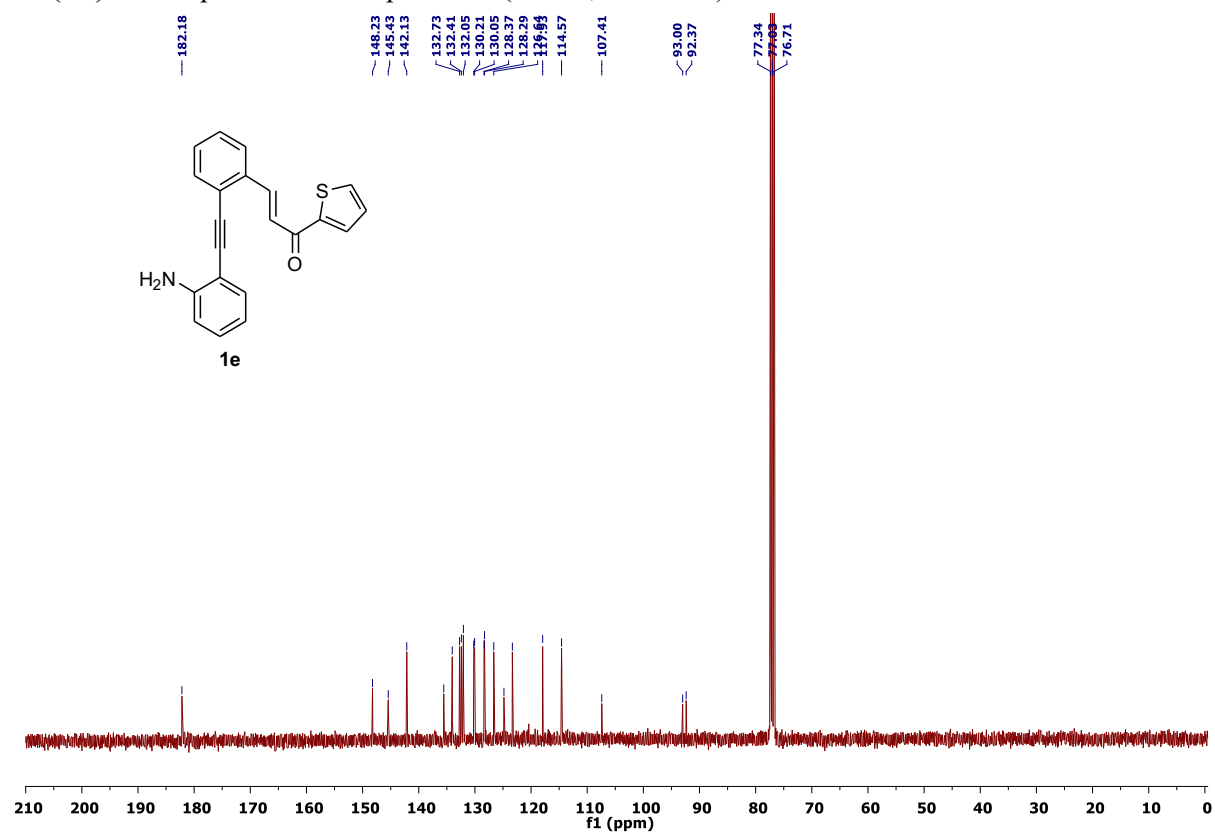

$^1\text{H}$  NMR spectrum of compound **1f** ( $\text{CDCl}_3$ , 400 MHz)

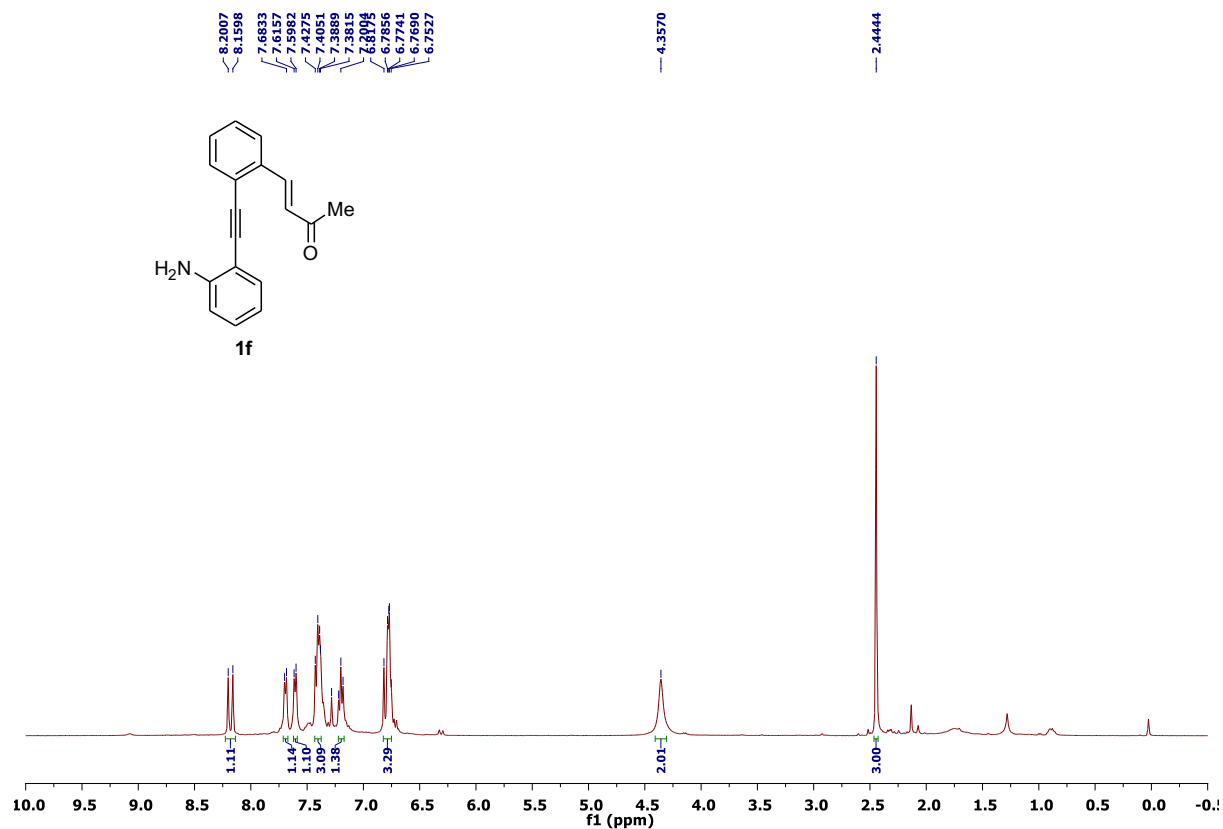

$^{13}\text{C}\{^1\text{H}\}$  NMR spectrum of compound **1f** ( $\text{CDCl}_3$ , 101 MHz)

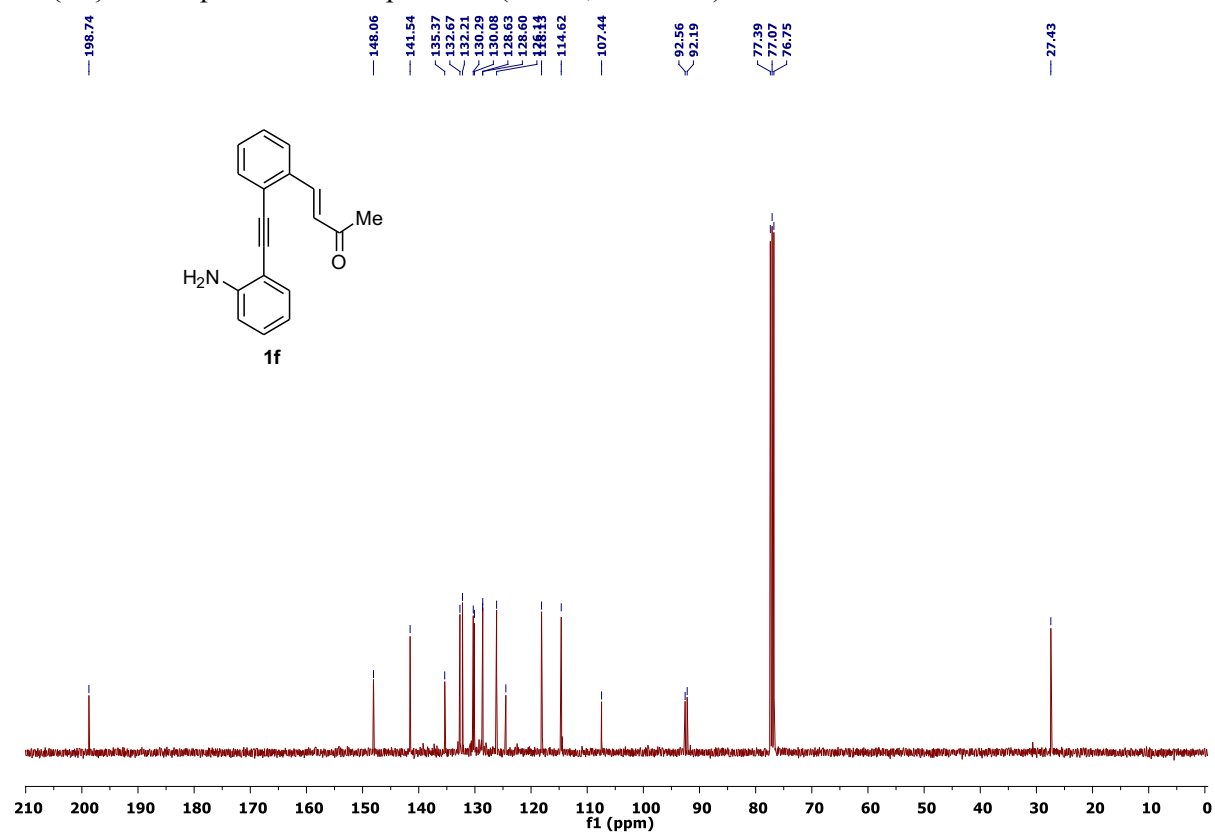

$^1\text{H}$  NMR spectrum of compound **1g** ( $\text{CDCl}_3$ , 400 MHz)

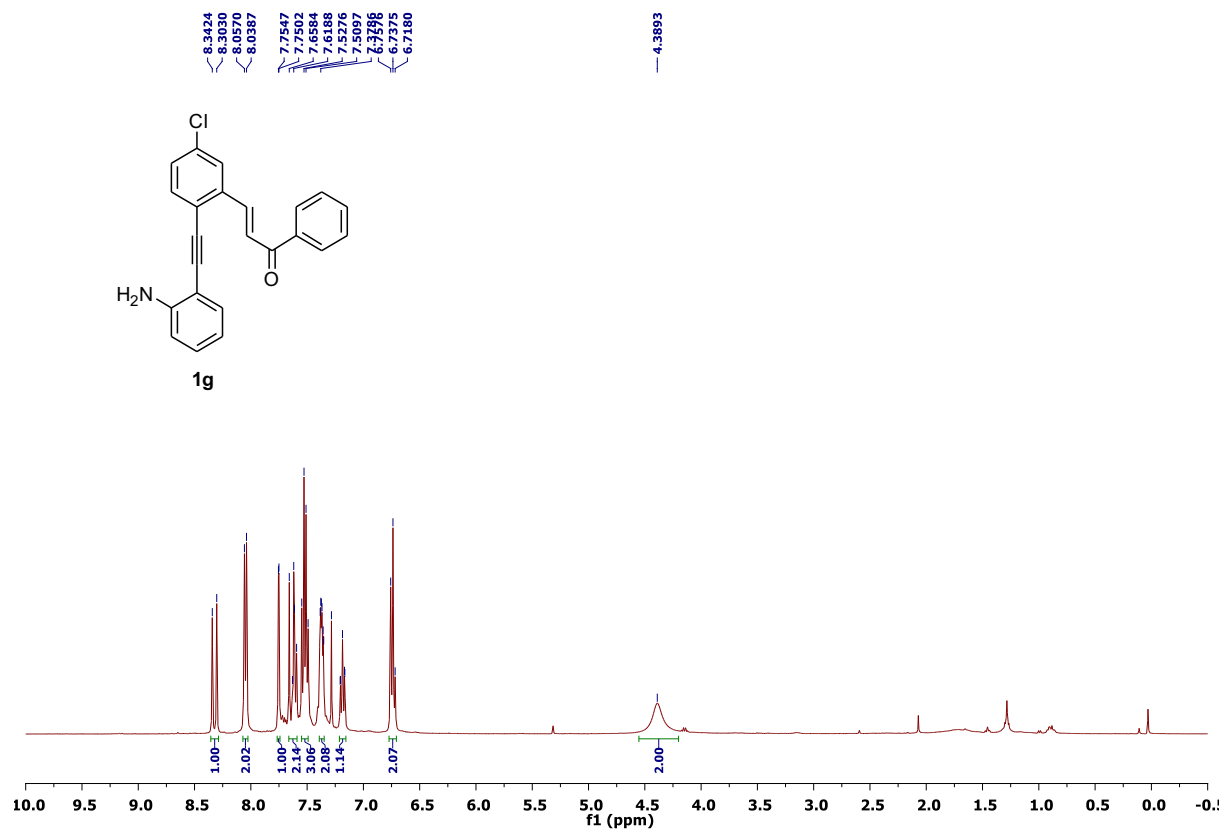

$^{13}\text{C}\{^1\text{H}\}$  NMR spectrum of compound **1g** ( $\text{CDCl}_3$ , 101 MHz)

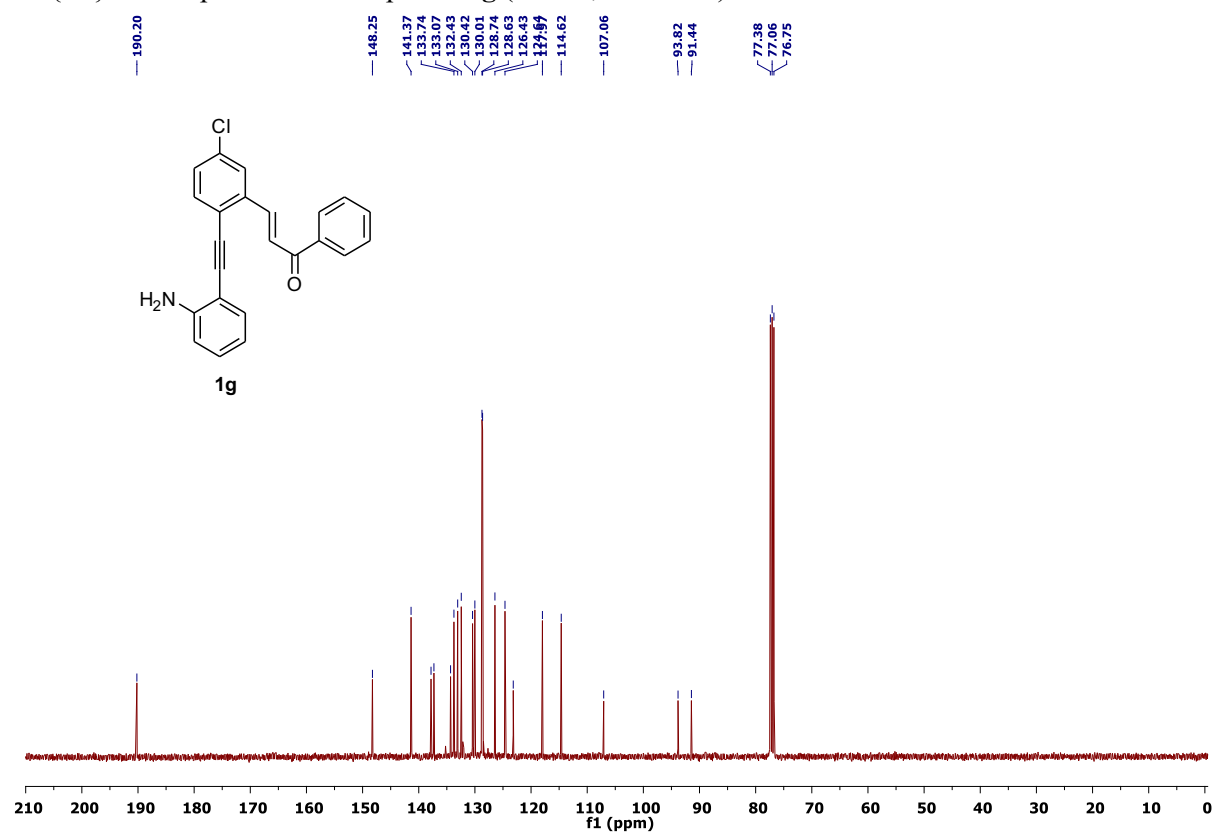

$^1\text{H}$  NMR spectrum of compound **1h** ( $\text{CDCl}_3$ , 400 MHz)

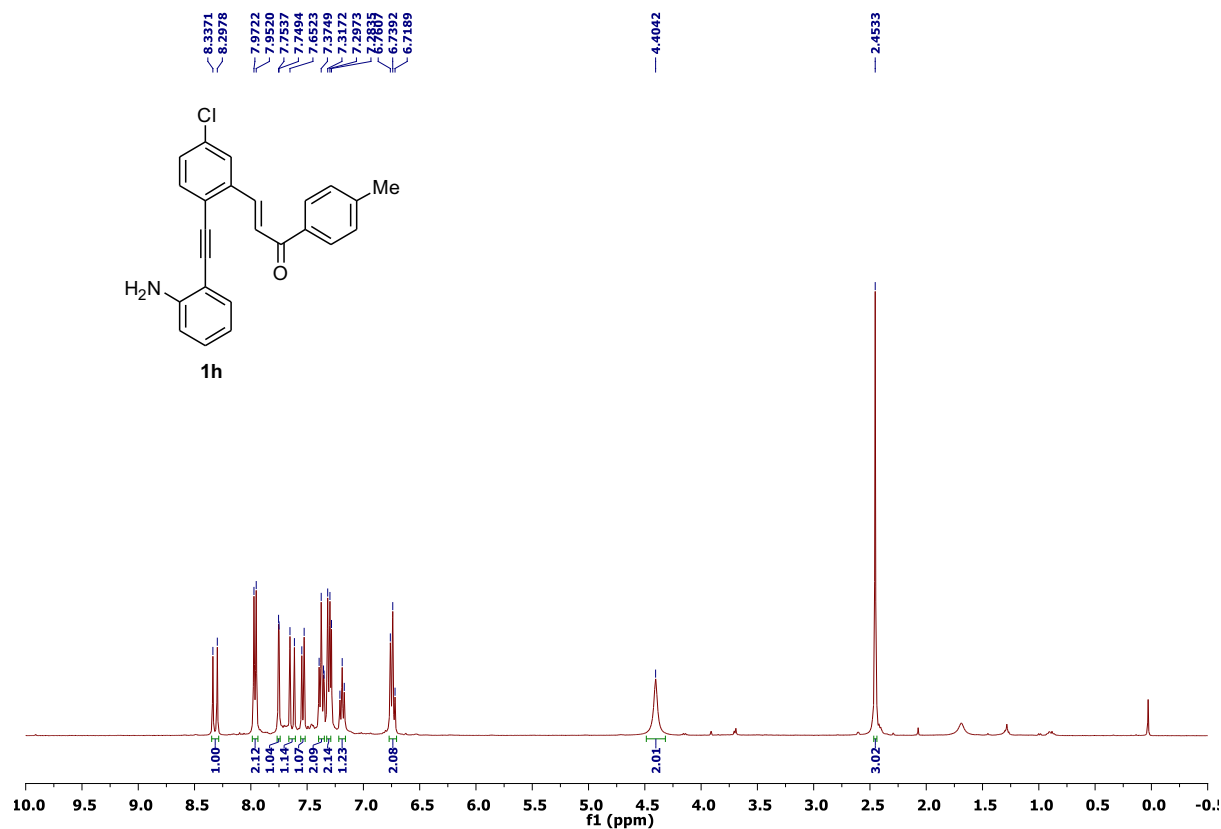

$^{13}\text{C}\{^1\text{H}\}$  NMR spectrum of compound **1h** ( $\text{CDCl}_3$ , 101 MHz)

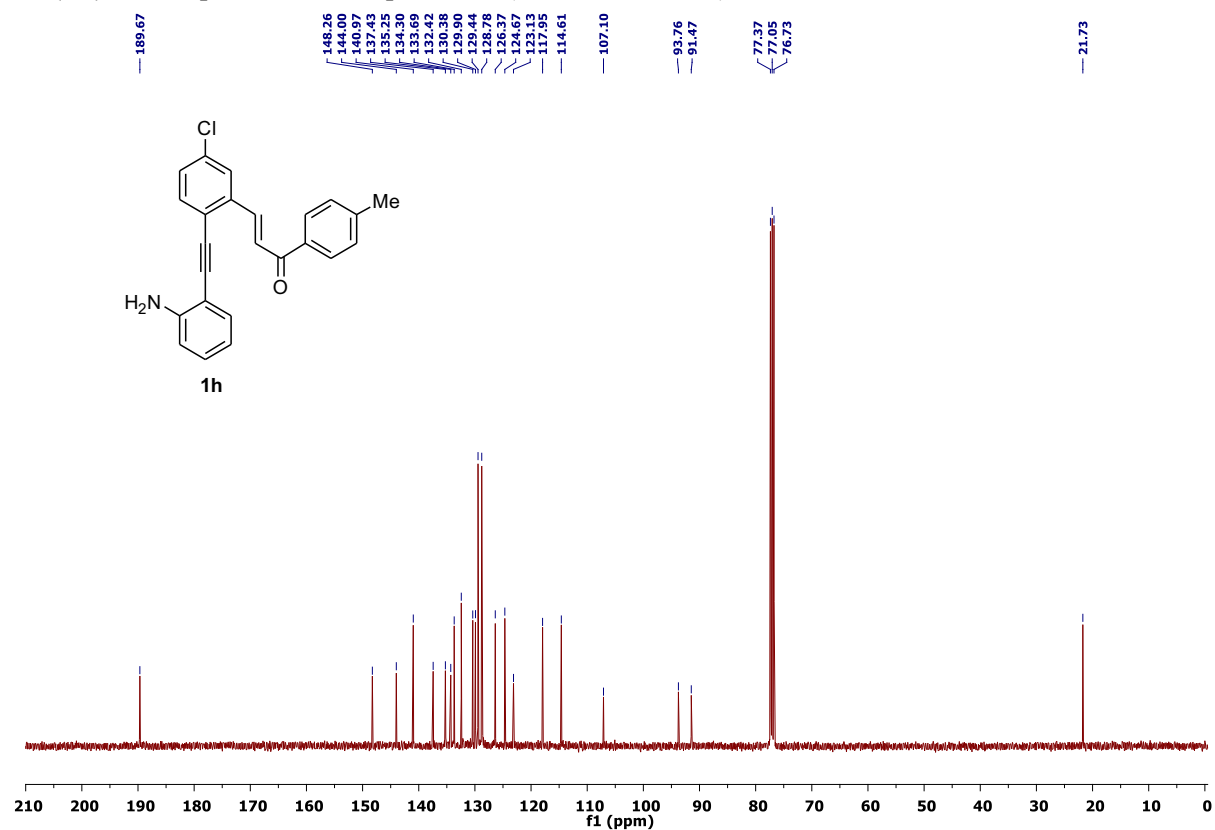



$^1\text{H}$  NMR spectrum of compound **1i** ( $\text{CDCl}_3$ , 400 MHz)

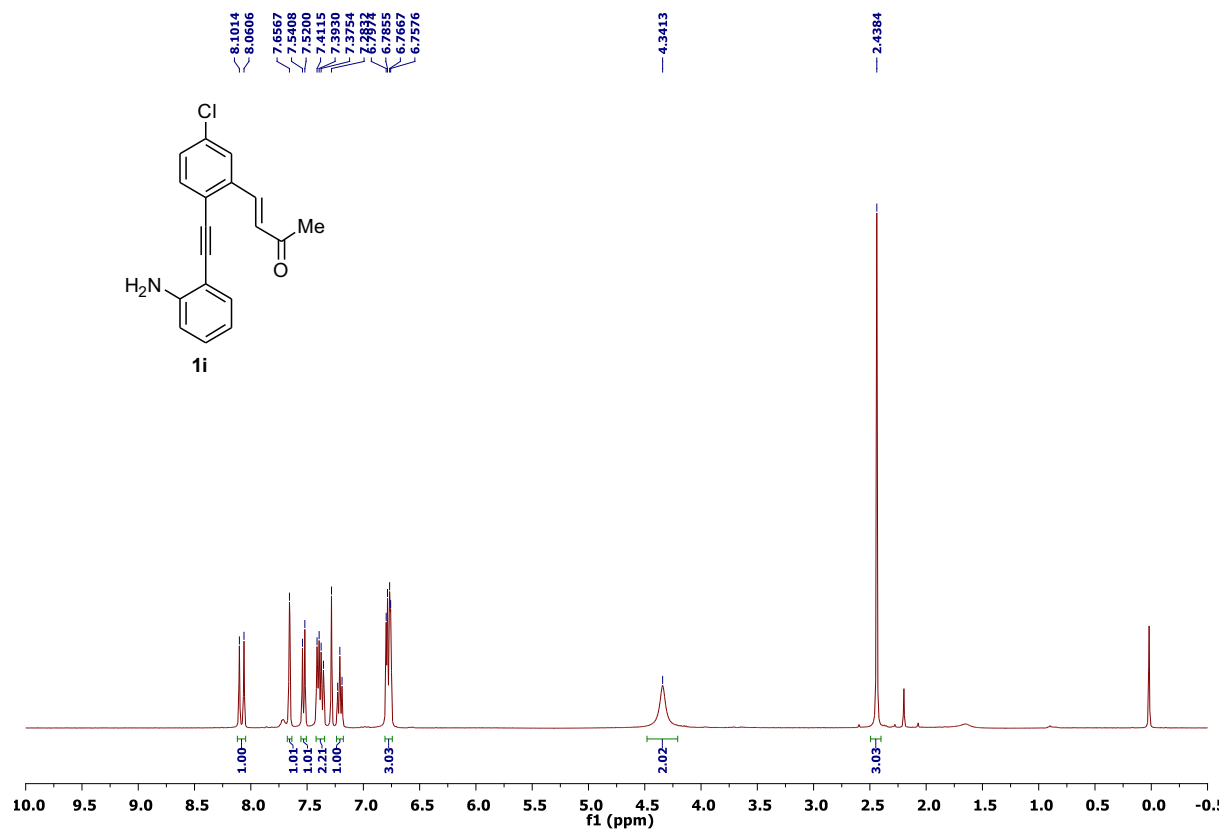

$^{13}\text{C}\{^1\text{H}\}$  NMR spectrum of compound **1i** ( $\text{CDCl}_3$ , 101 MHz)

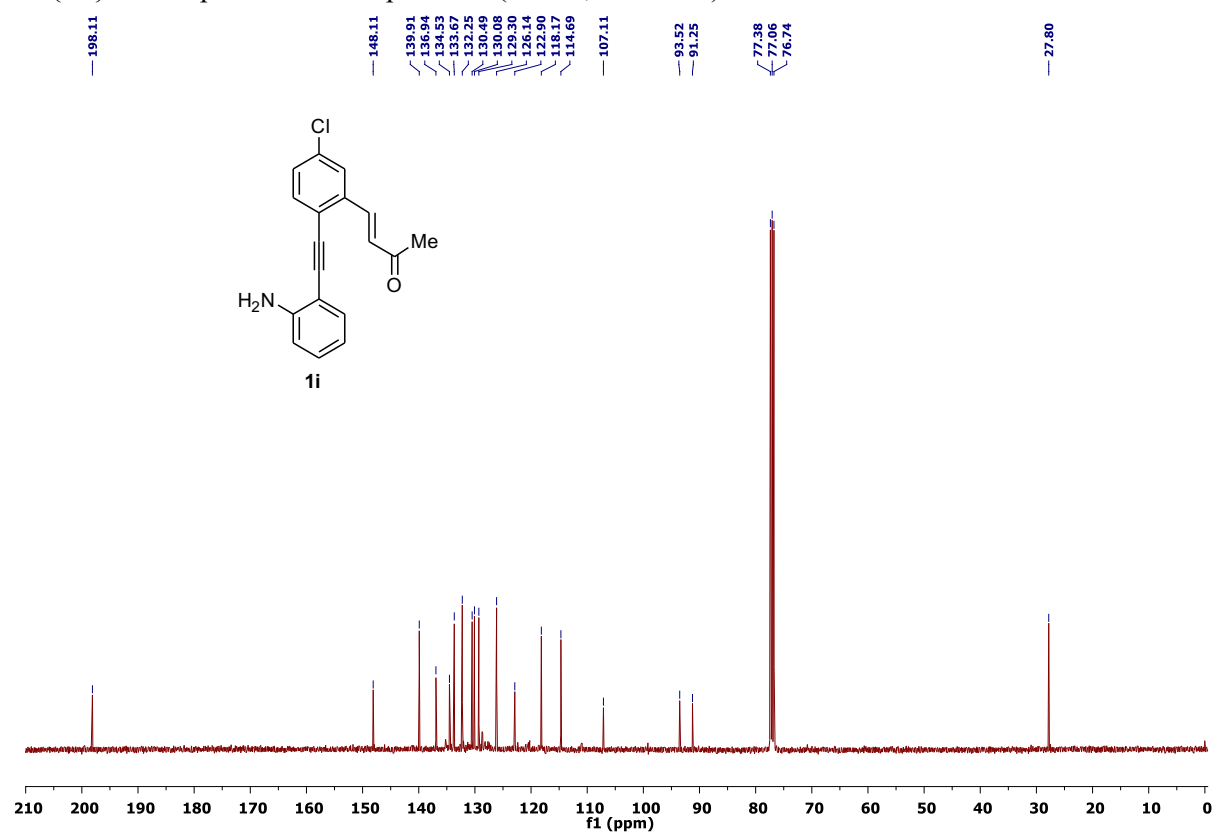

$^1\text{H}$  NMR spectrum of compound **1j** ( $\text{CDCl}_3$ , 400 MHz)

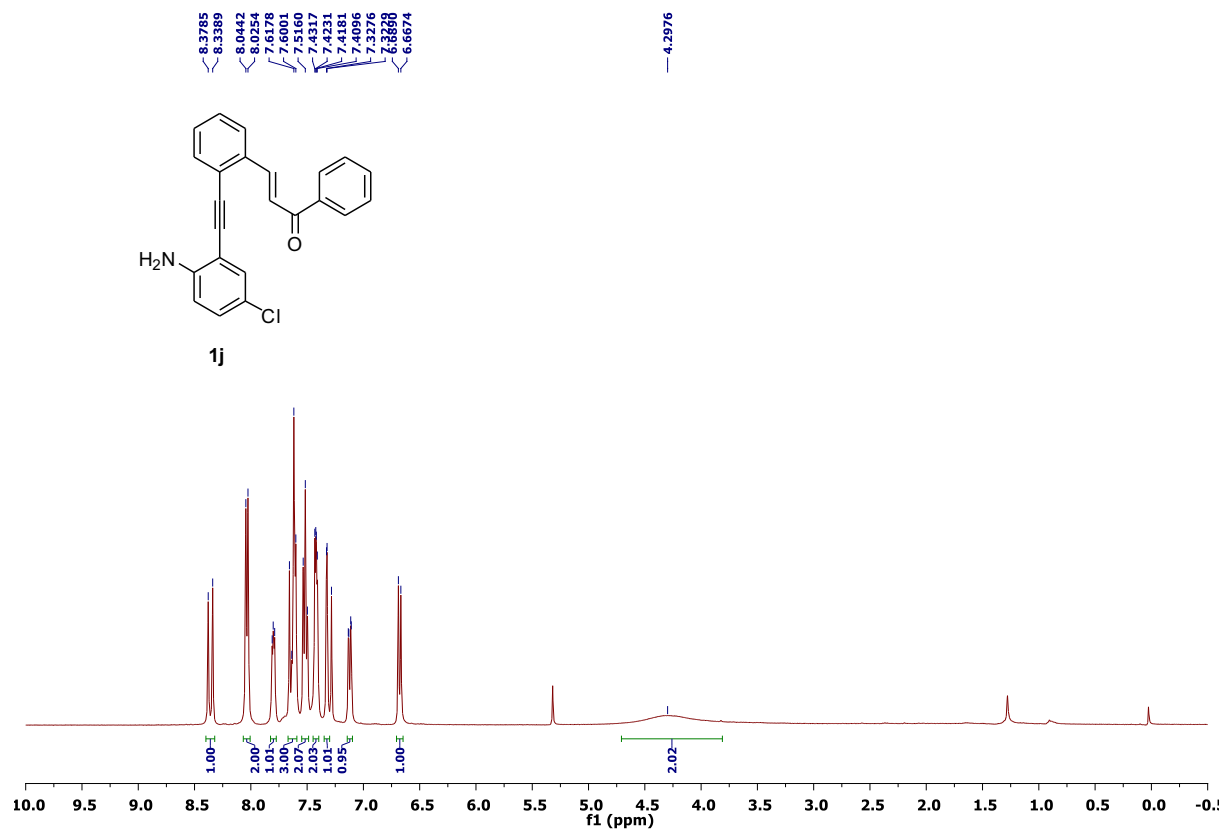

$^{13}\text{C}\{^1\text{H}\}$  NMR spectrum of compound **1j** ( $\text{CDCl}_3$ , 101 MHz)

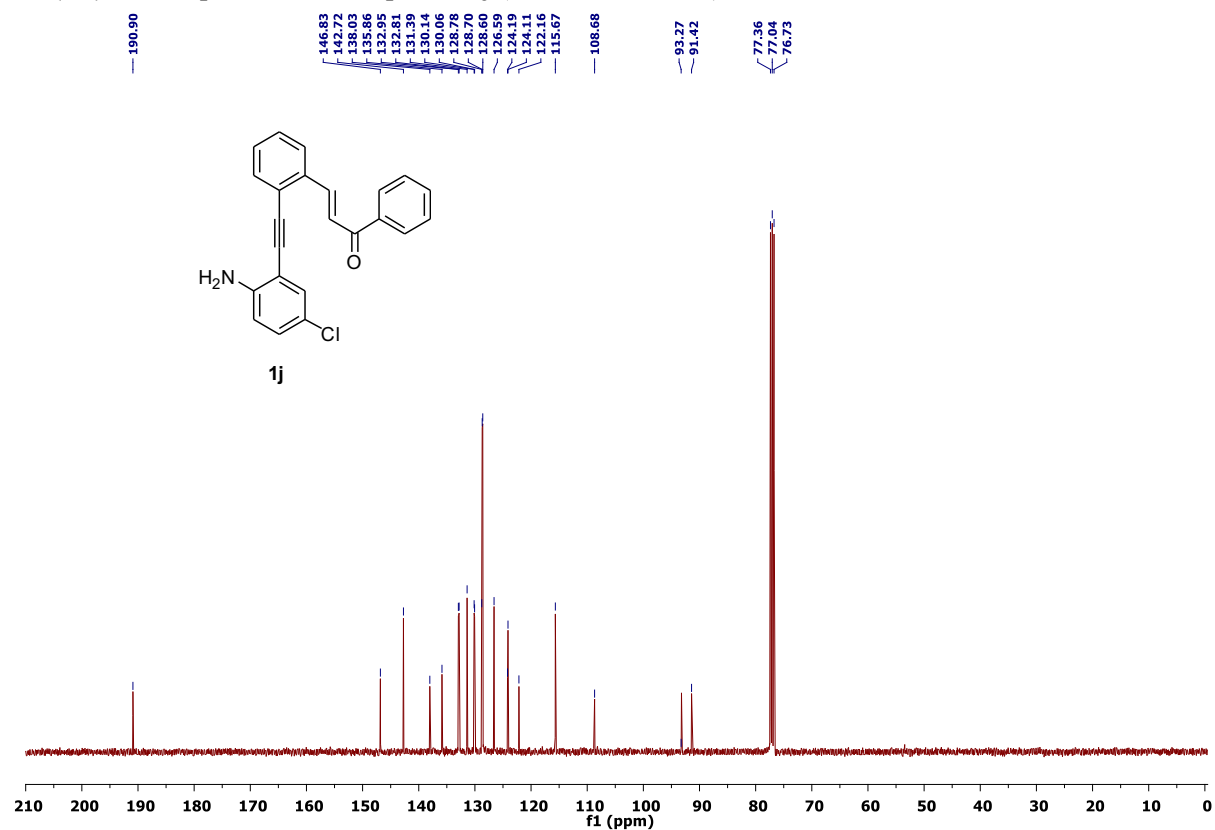

$^1\text{H}$  NMR spectrum of compound **1k** ( $\text{CDCl}_3$ , 400 MHz)

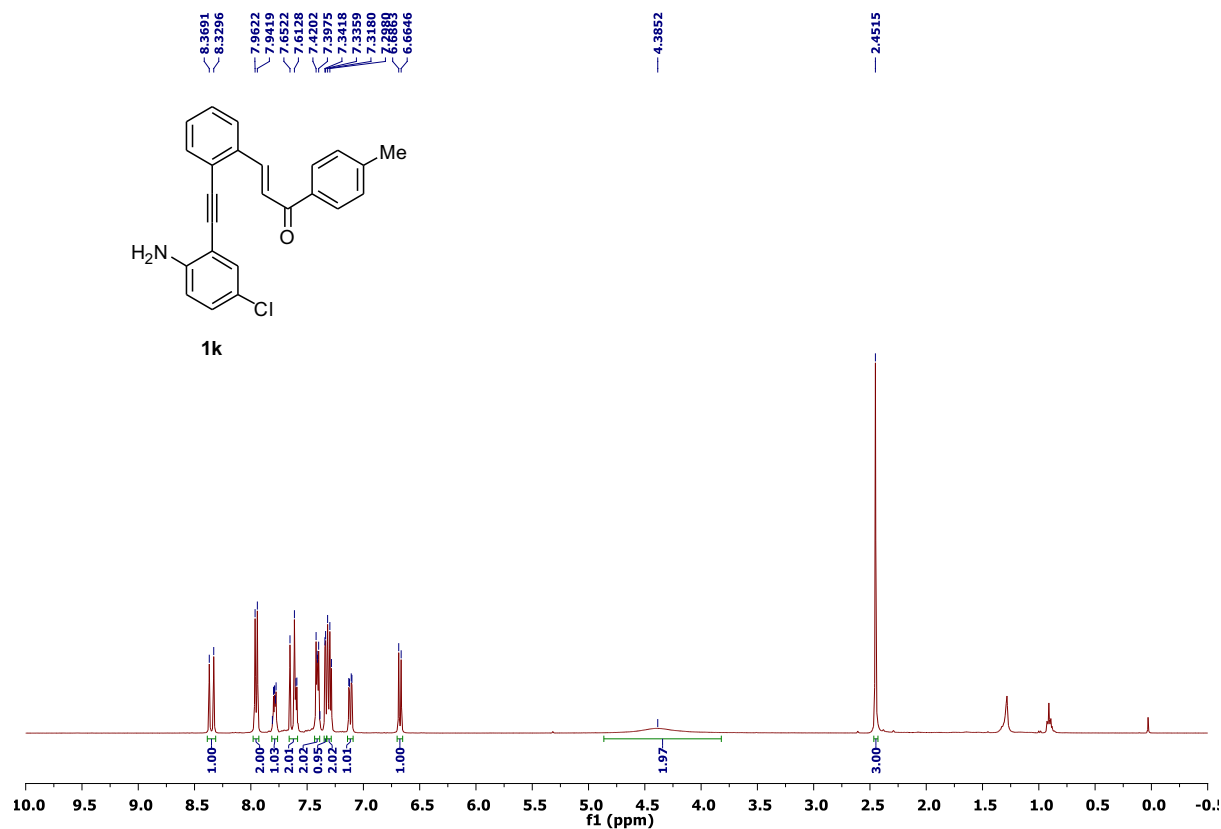

$^{13}\text{C}\{^1\text{H}\}$  NMR spectrum of compound **1k** ( $\text{CDCl}_3$ , 101 MHz)

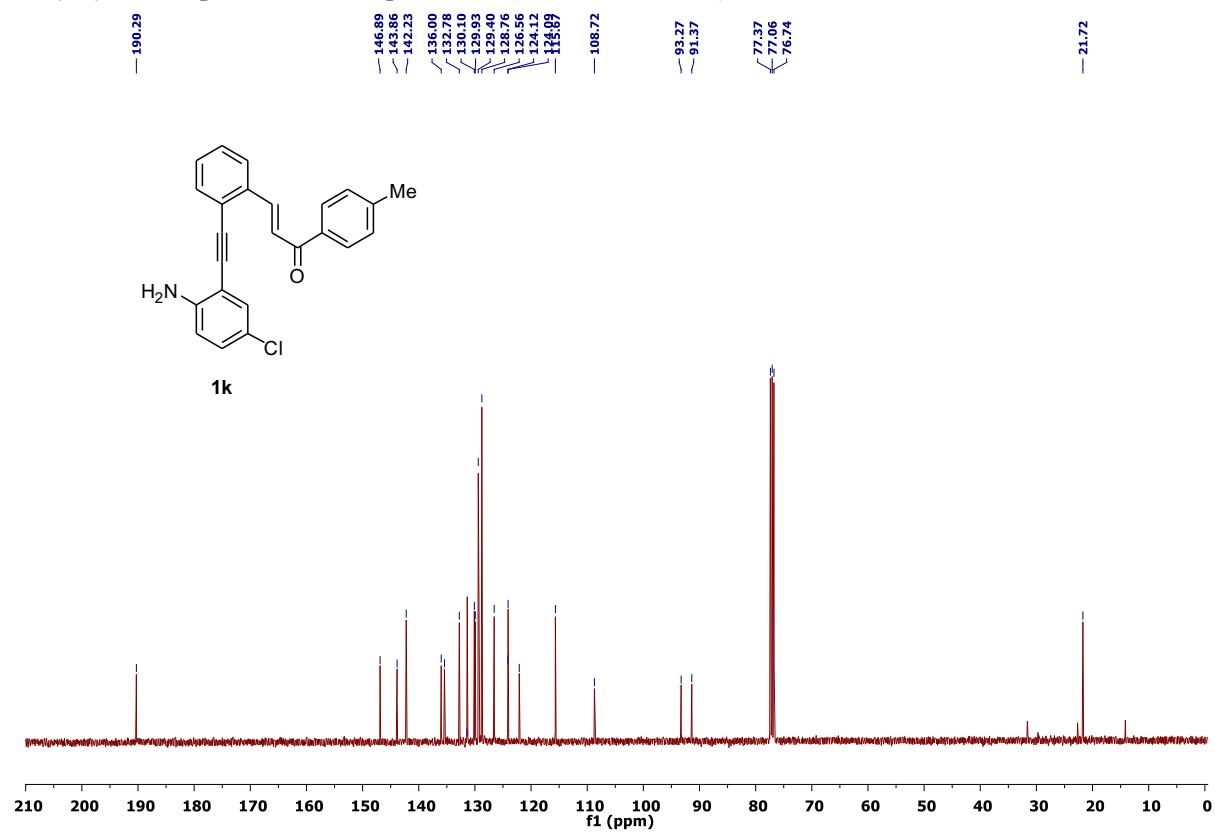

$^1\text{H}$  NMR spectrum of compound **II** ( $\text{CDCl}_3$ , 400 MHz)

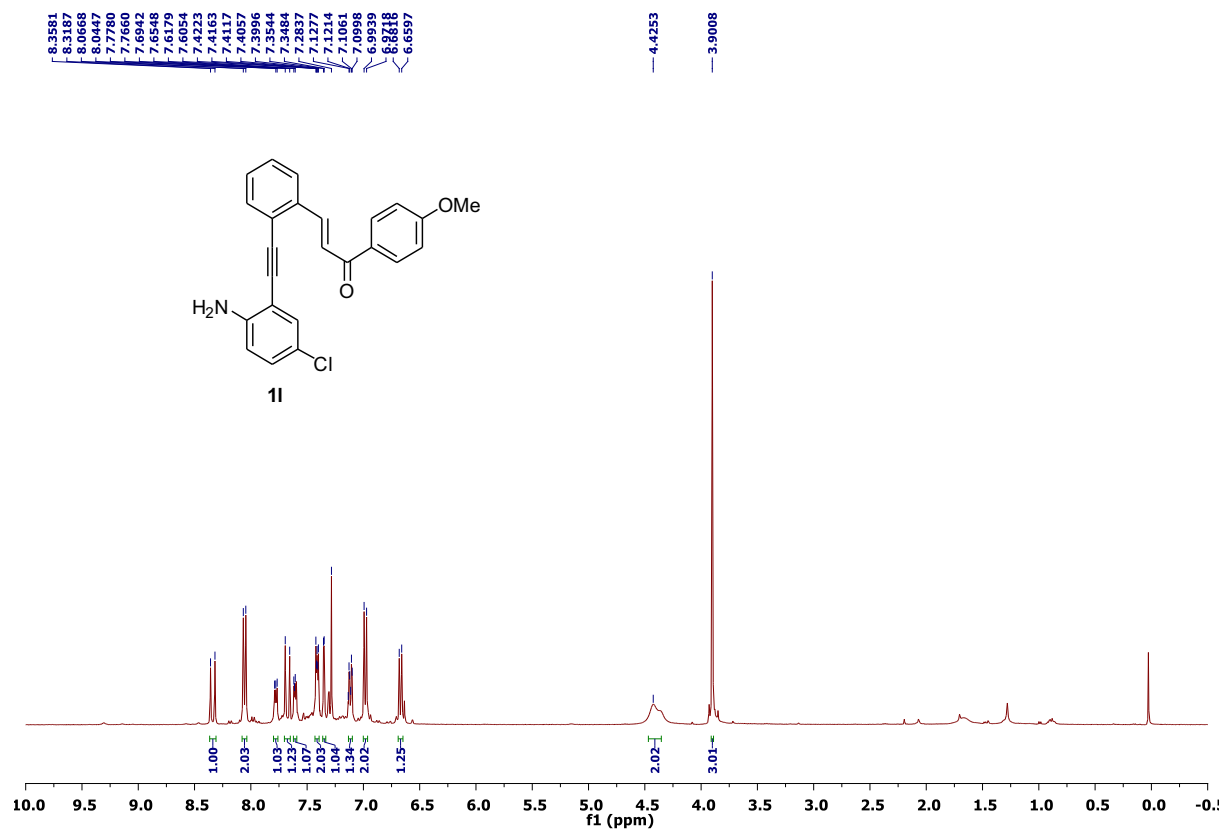

$^{13}\text{C}\{^1\text{H}\}$  NMR spectrum of compound **II** ( $\text{CDCl}_3$ , 101 MHz)

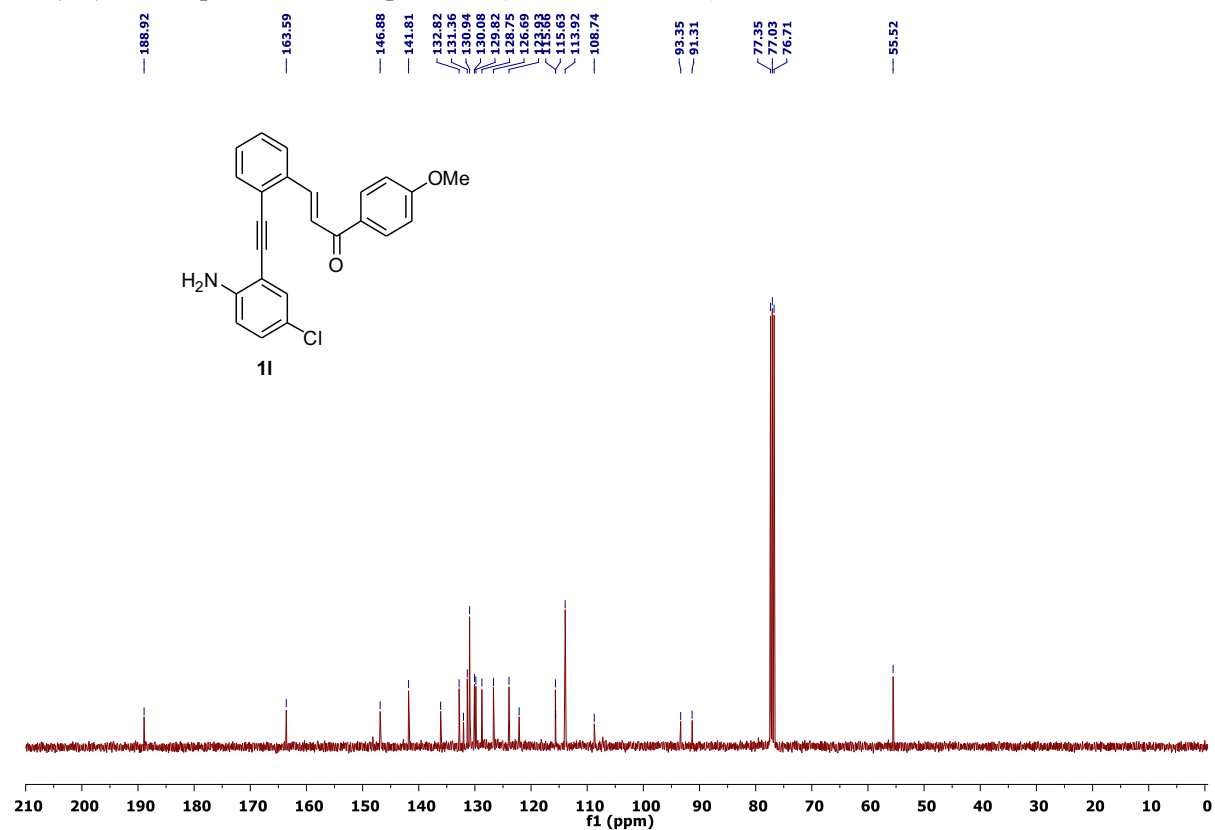

$^1\text{H}$  NMR spectrum of compound **1m** ( $\text{CDCl}_3$ , 400 MHz)

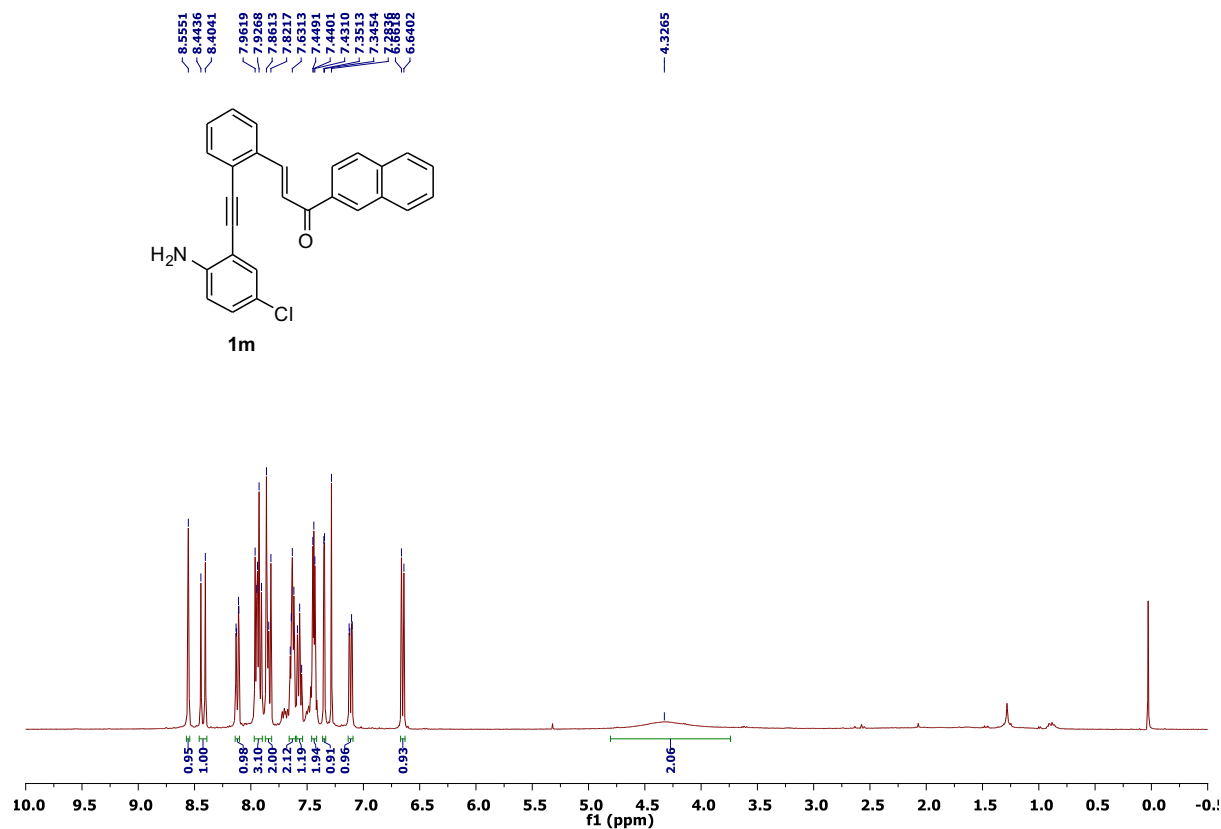

$^{13}\text{C}\{^1\text{H}\}$  NMR spectrum of compound **1m** ( $\text{CDCl}_3$ , 101 MHz)

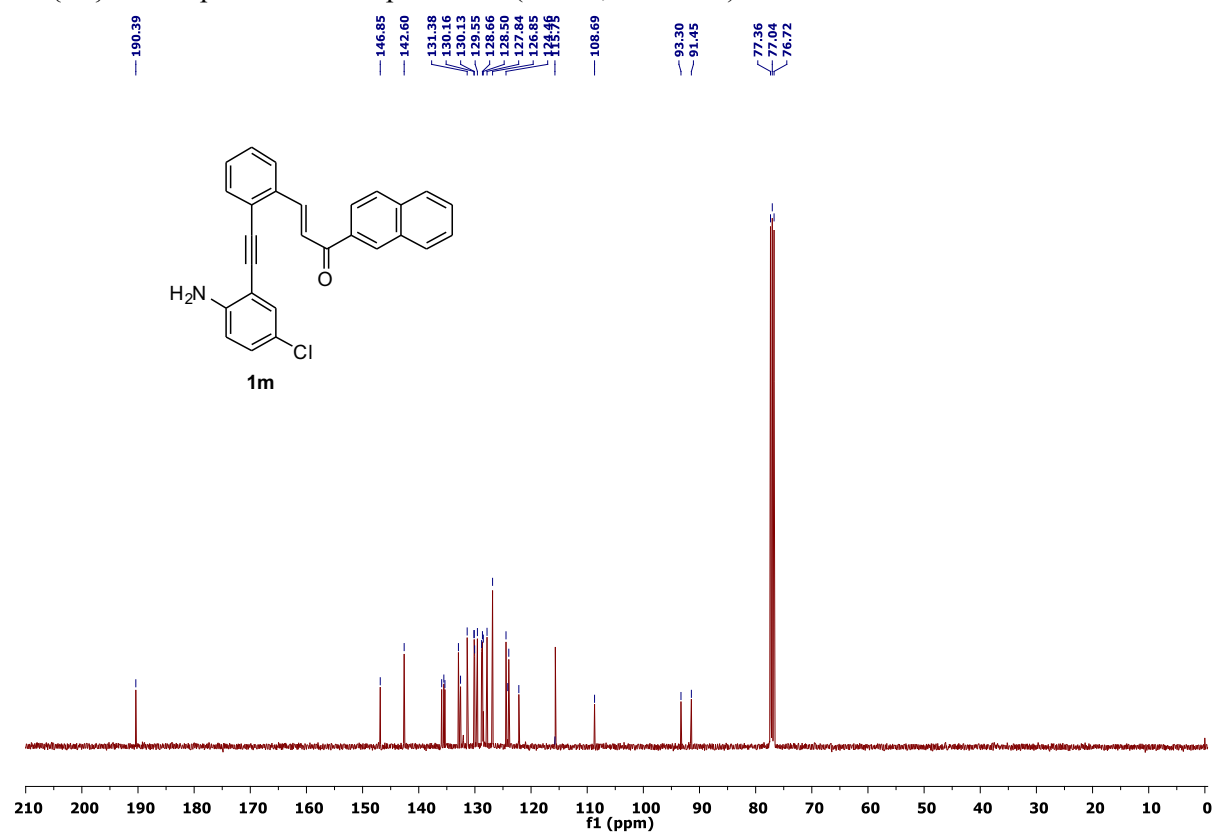

$^1\text{H}$  NMR spectrum of compound **1n** ( $\text{CDCl}_3$ , 400 MHz)

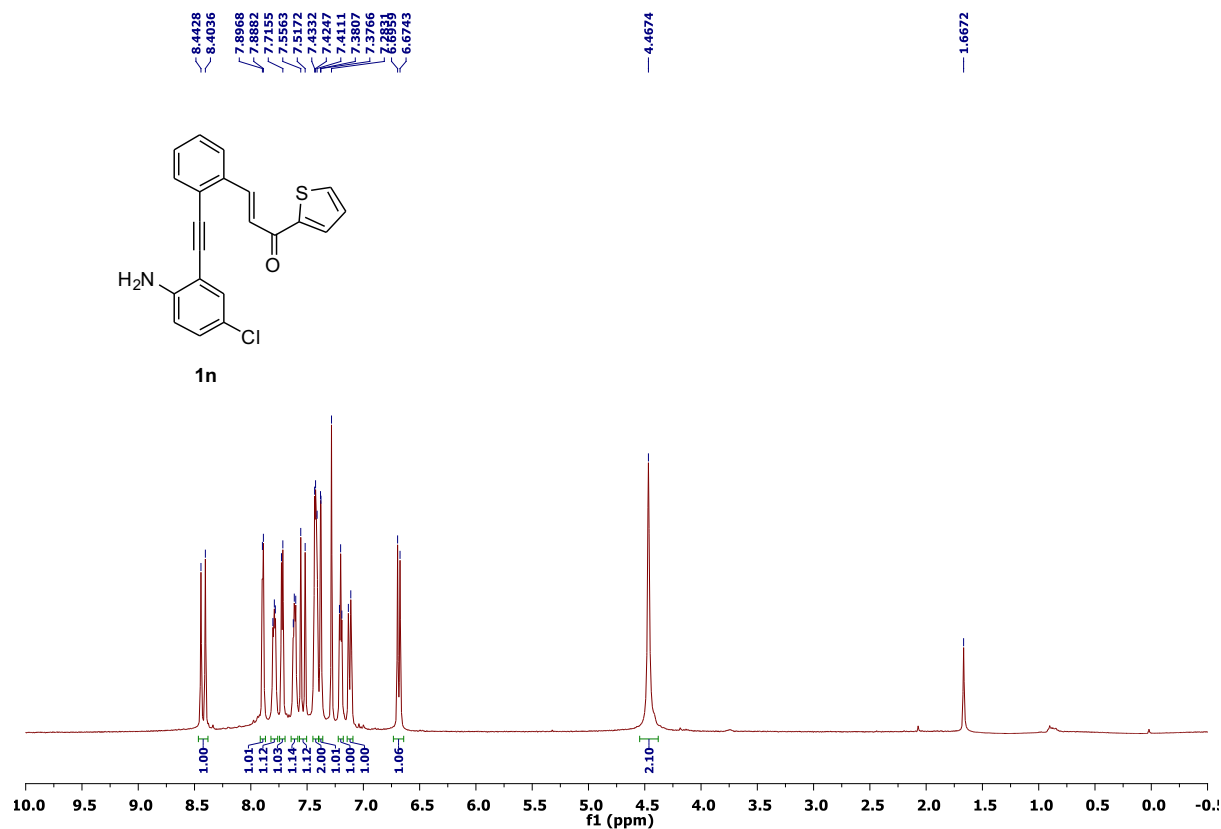

$^{13}\text{C}\{^1\text{H}\}$  NMR spectrum of compound **1n** ( $\text{CDCl}_3$ , 101 MHz)

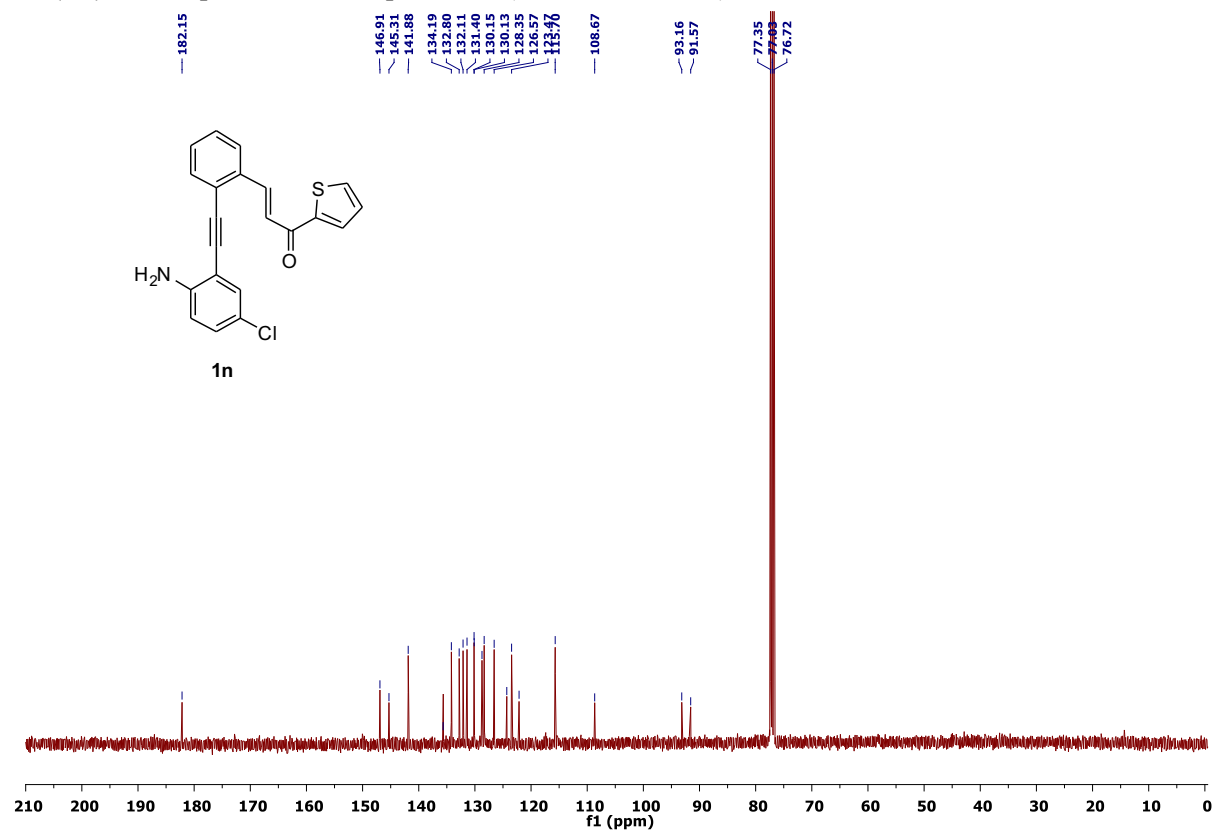

$^1\text{H}$  NMR spectrum of compound **1o** ( $\text{CDCl}_3$ , 400 MHz)

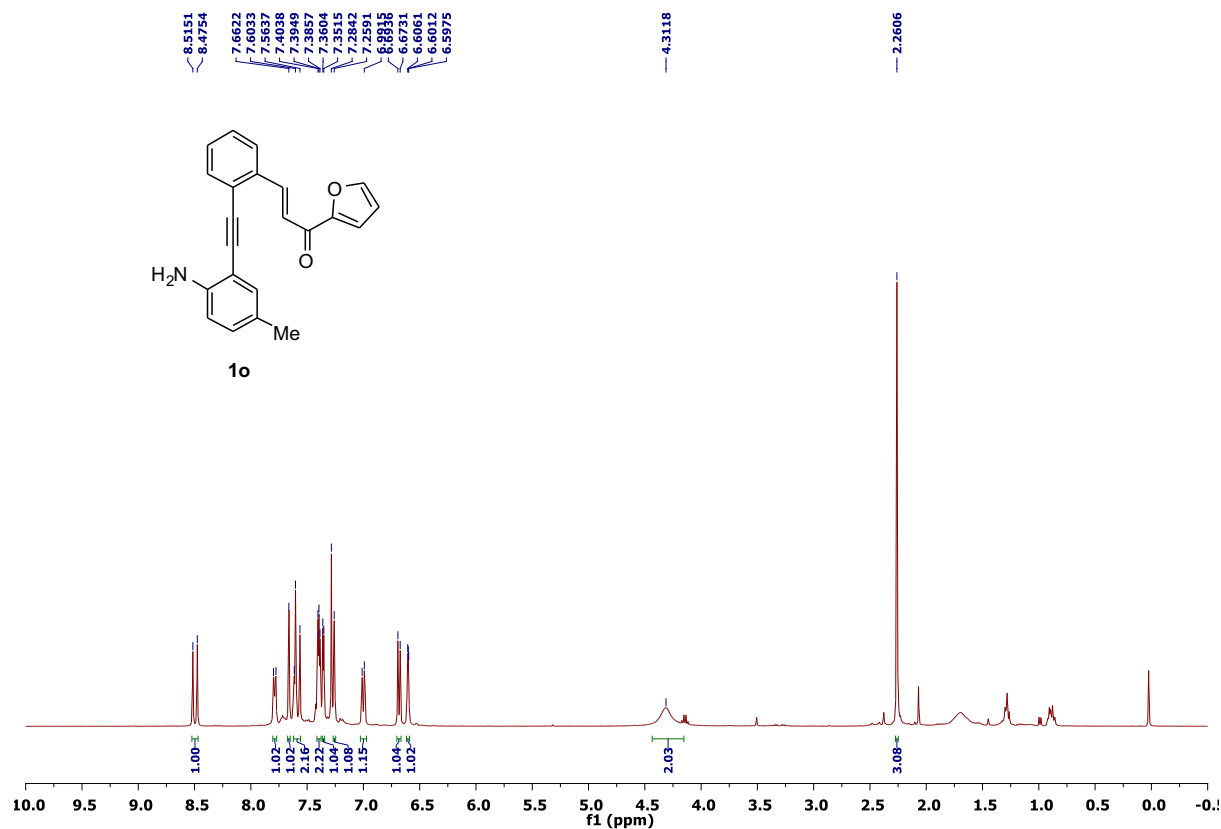

$^{13}\text{C}\{^1\text{H}\}$  NMR spectrum of compound **1o** ( $\text{CDCl}_3$ , 101 MHz)

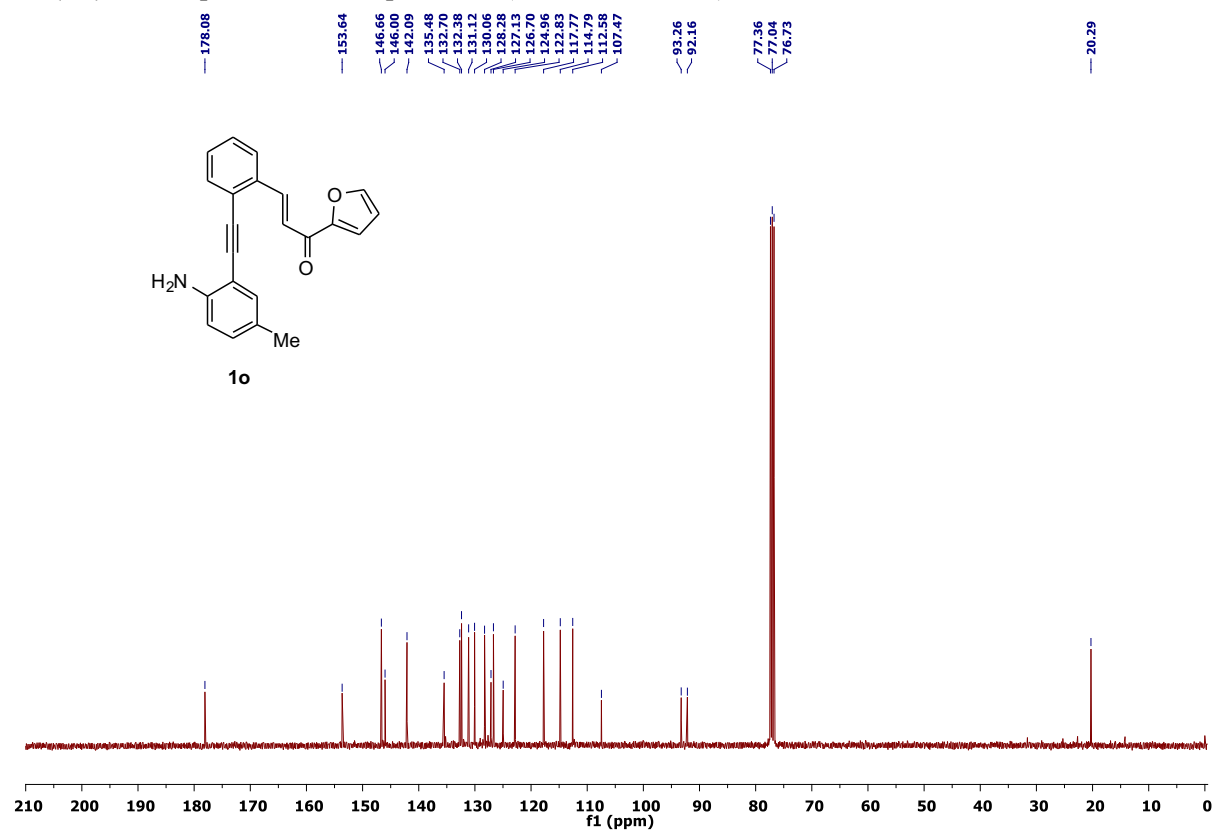

$^1\text{H}$  NMR spectrum of compound **1p** ( $\text{CDCl}_3$ , 400 MHz)

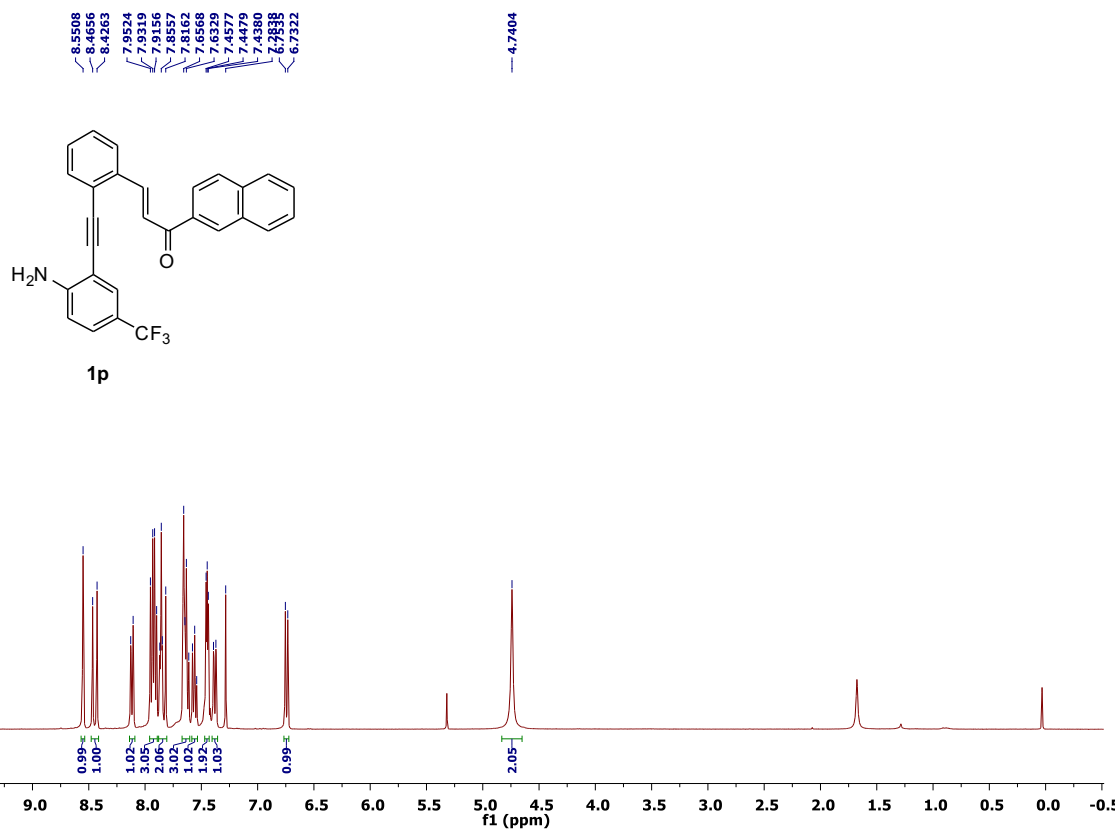

$^{13}\text{C}\{^1\text{H}\}$  NMR spectrum of compound **1p** ( $\text{CDCl}_3$ , 101 MHz)

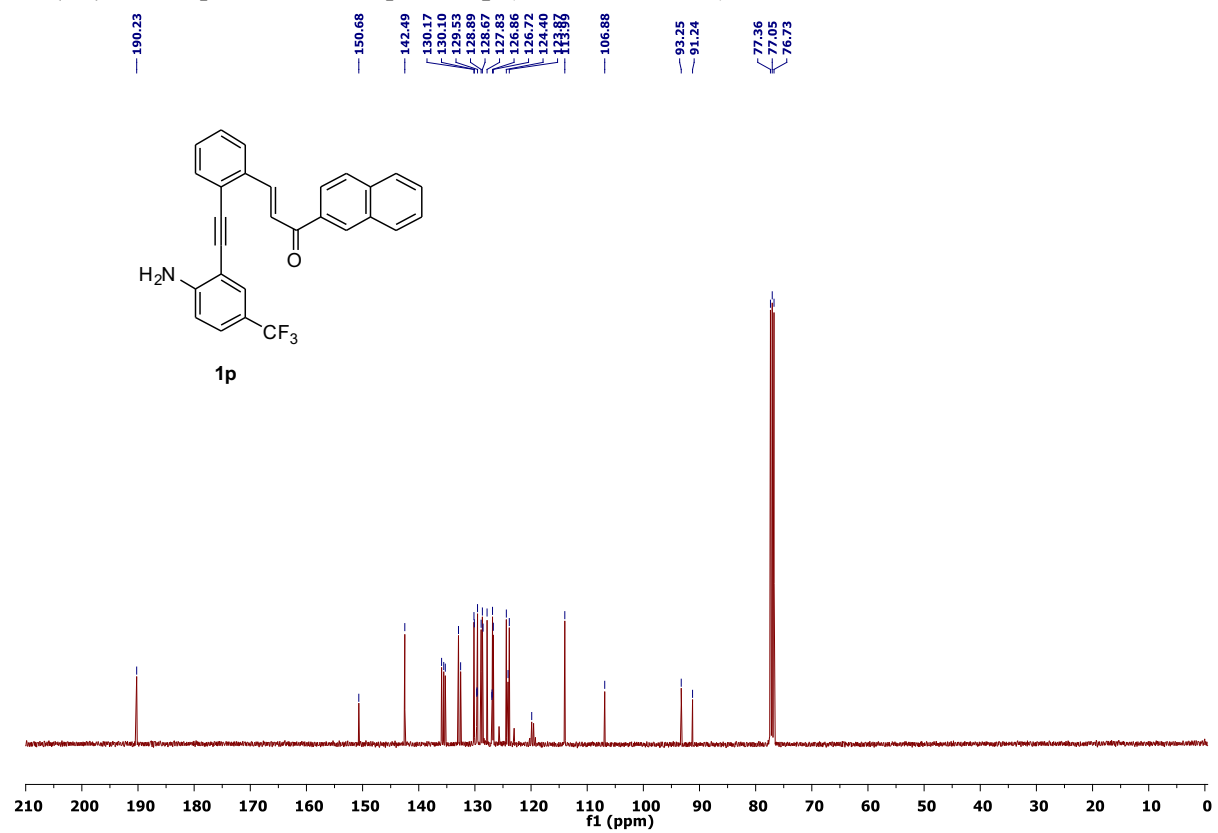



$^1\text{H}$  NMR spectrum of compound **1q** ( $\text{CDCl}_3$ , 400 MHz)

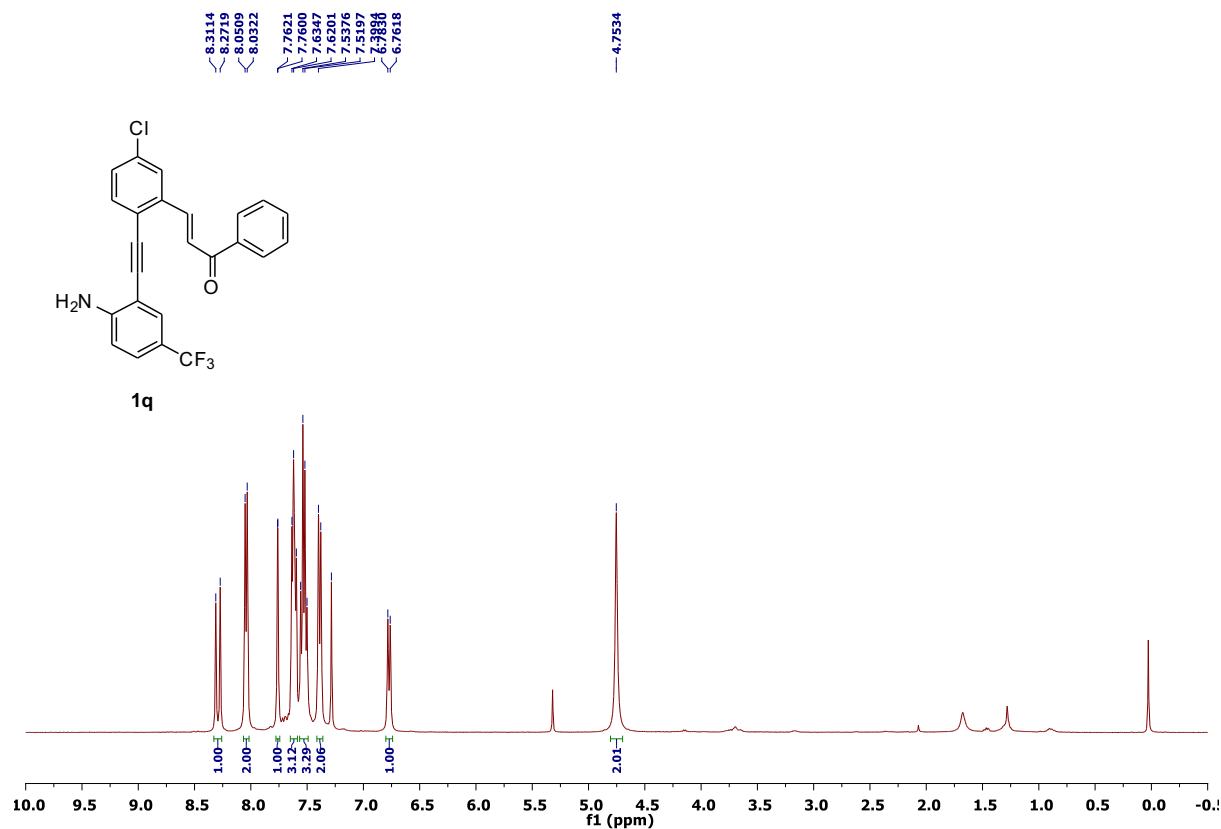

$^{13}\text{C}\{^1\text{H}\}$  NMR spectrum of compound **1q** ( $\text{CDCl}_3$ , 101 MHz)

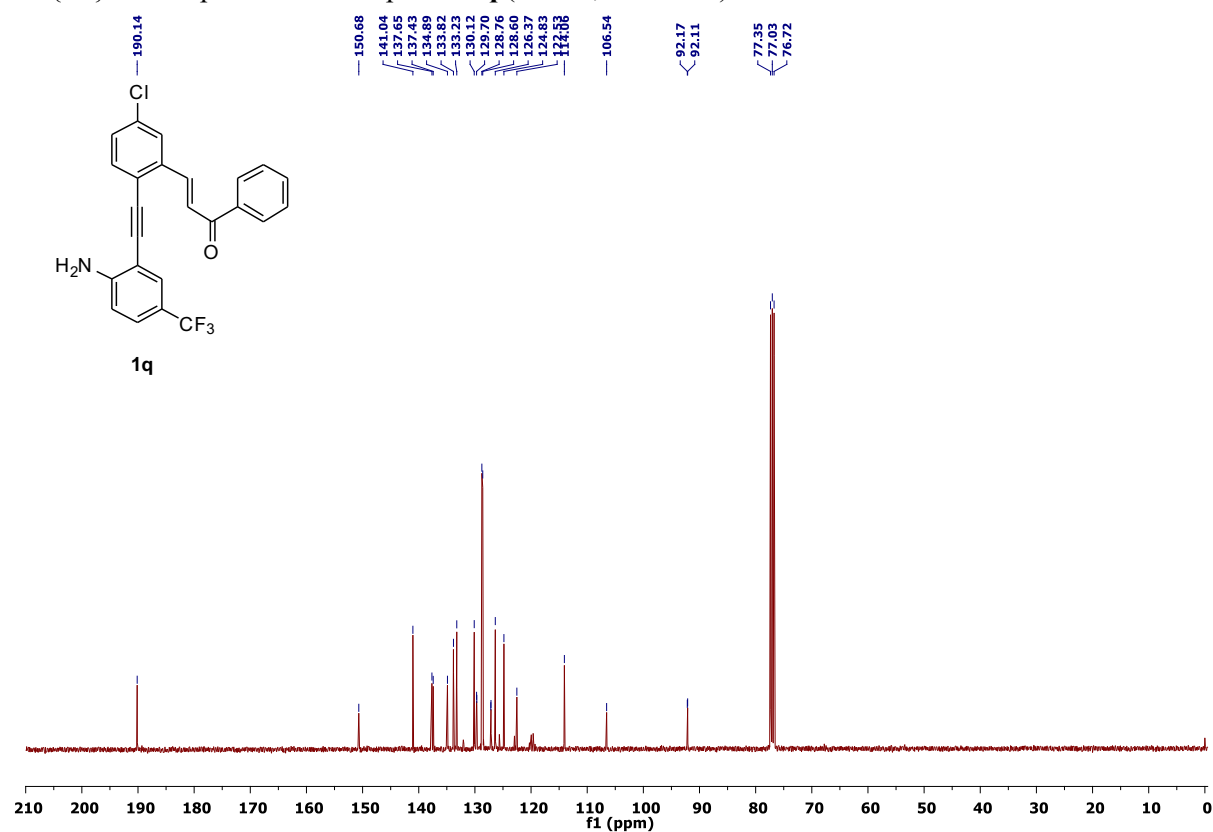

$^1\text{H}$  NMR spectrum of compound **1r** ( $\text{CDCl}_3$ , 400 MHz)

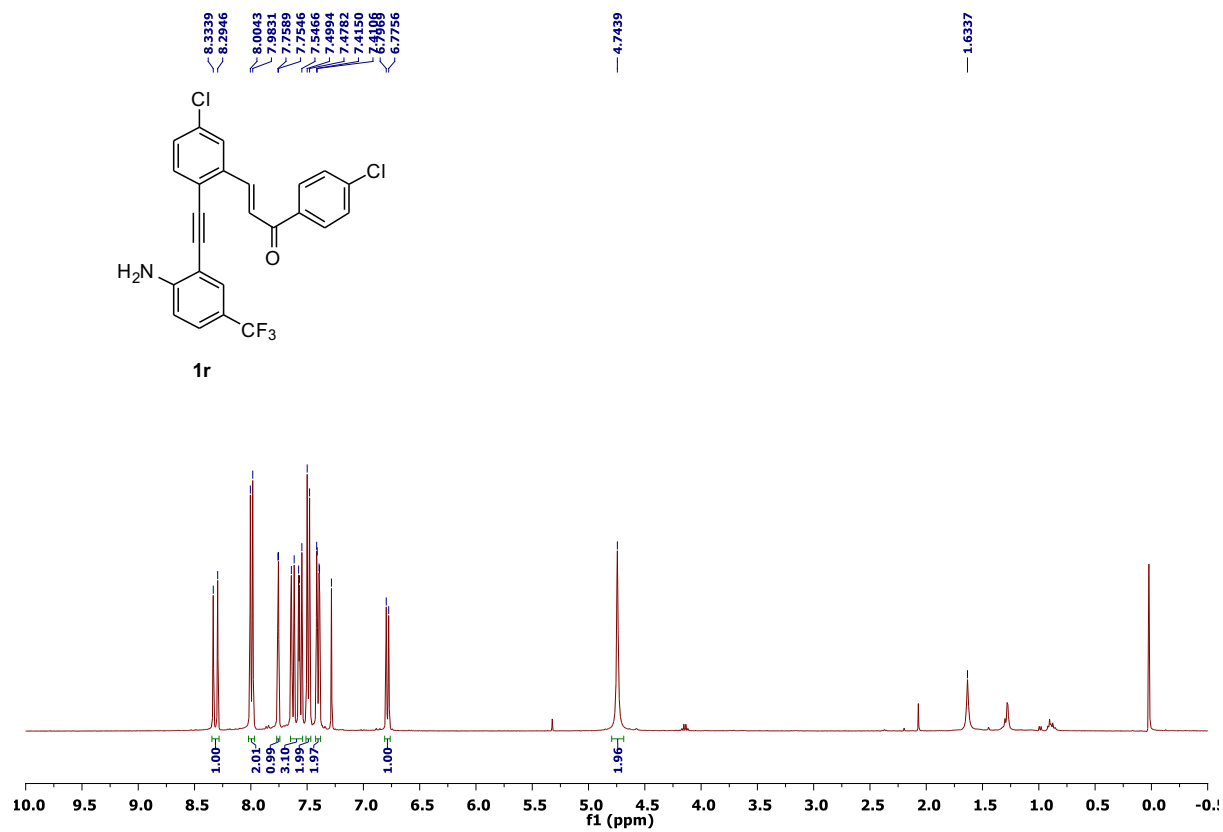

$^{13}\text{C}\{^1\text{H}\}$  NMR spectrum of compound **1r** ( $\text{CDCl}_3$ , 101 MHz)

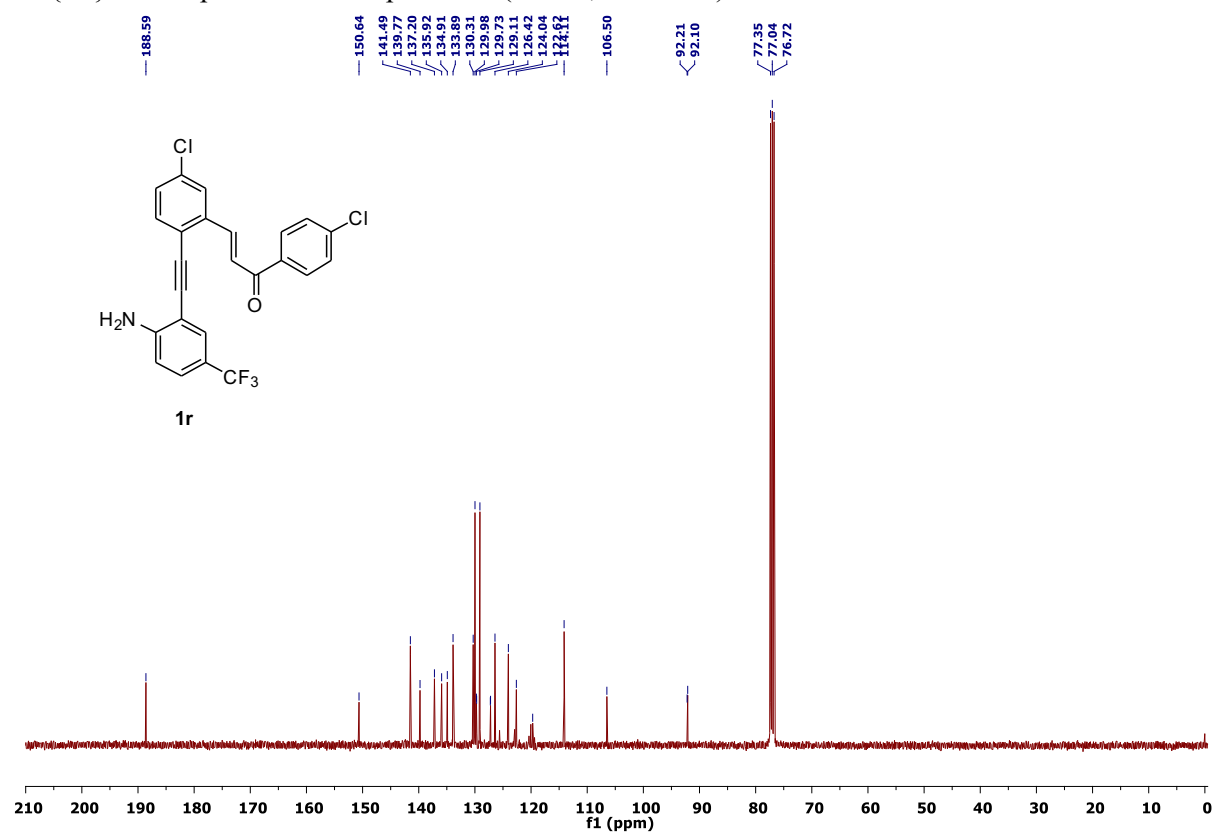

$^1\text{H}$  NMR spectrum of compound **1s** ( $\text{CDCl}_3$ , 400 MHz)

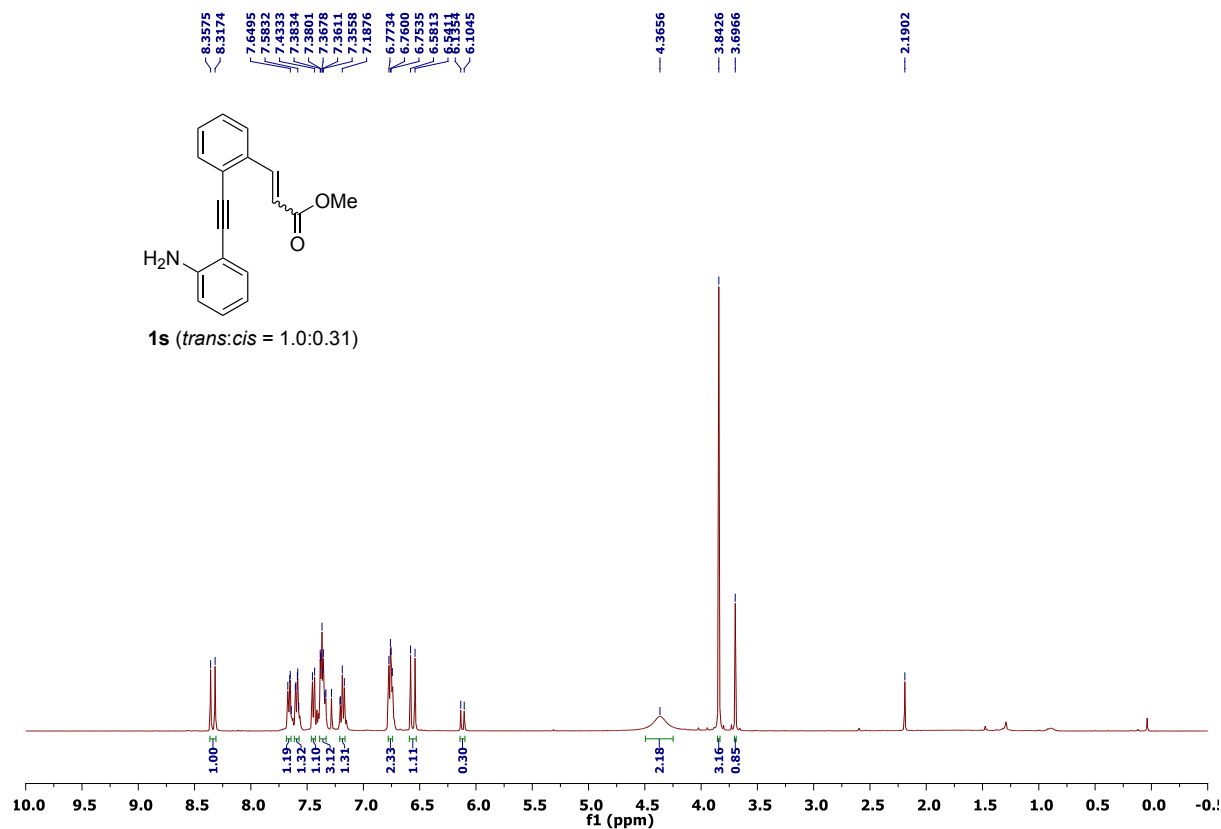

$^{13}\text{C}\{^1\text{H}\}$  NMR spectrum of compound **1s** ( $\text{CDCl}_3$ , 101 MHz)

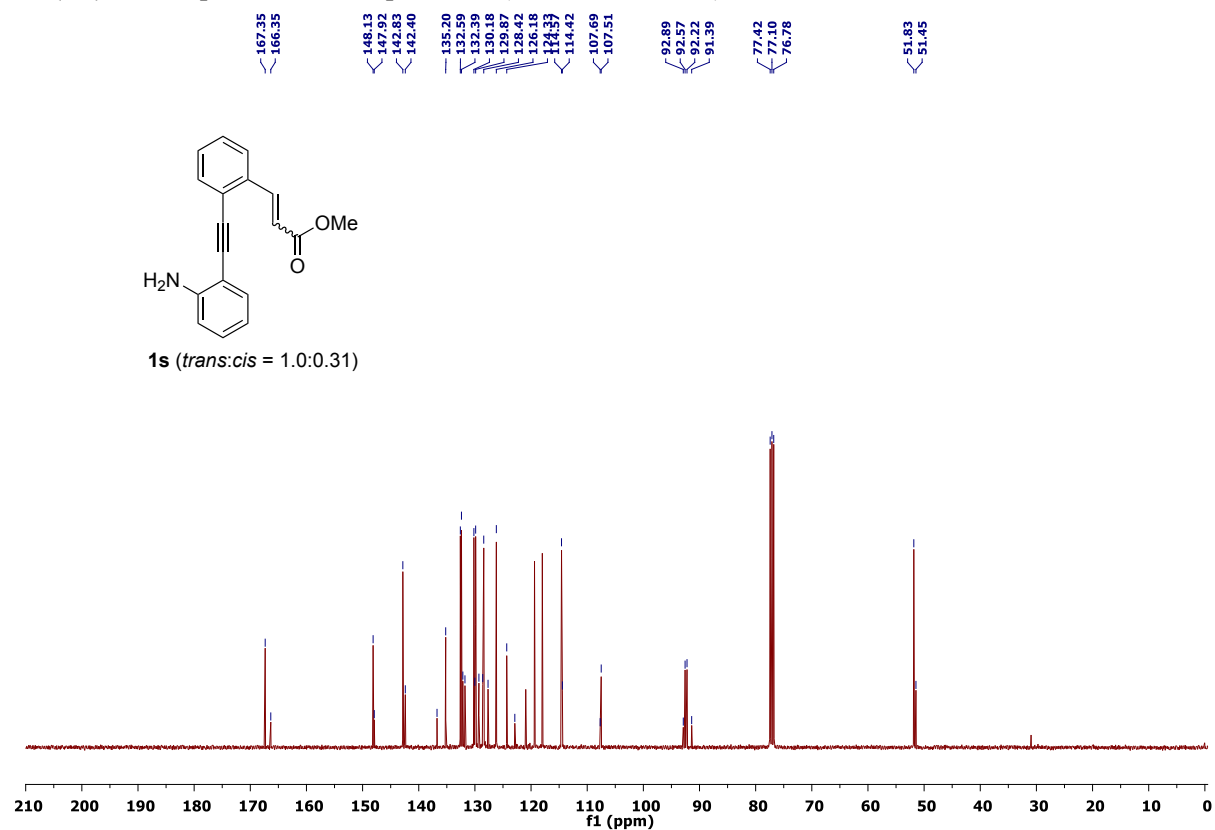

$^1\text{H}$  NMR spectrum of compound **1t** ( $\text{CDCl}_3$ , 400 MHz)

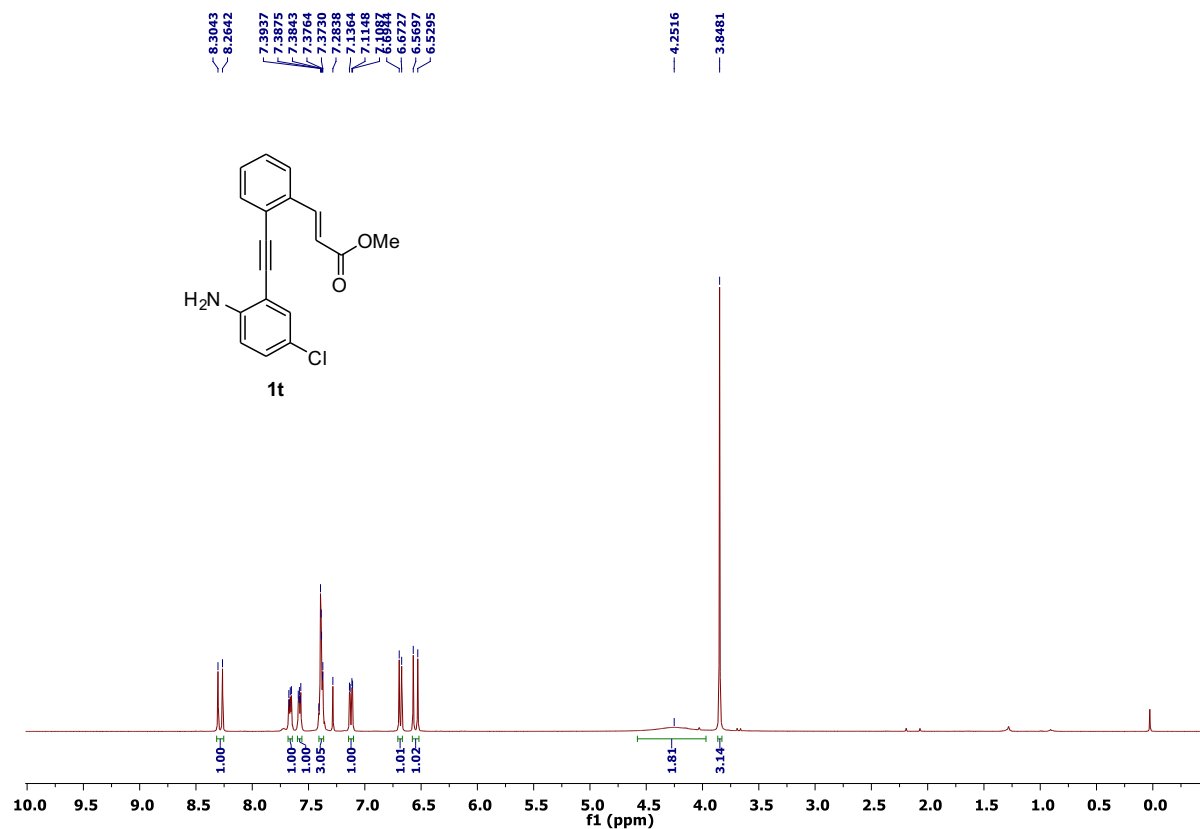

$^{13}\text{C}\{^1\text{H}\}$  NMR spectrum of compound **1t** ( $\text{CDCl}_3$ , 101 MHz)

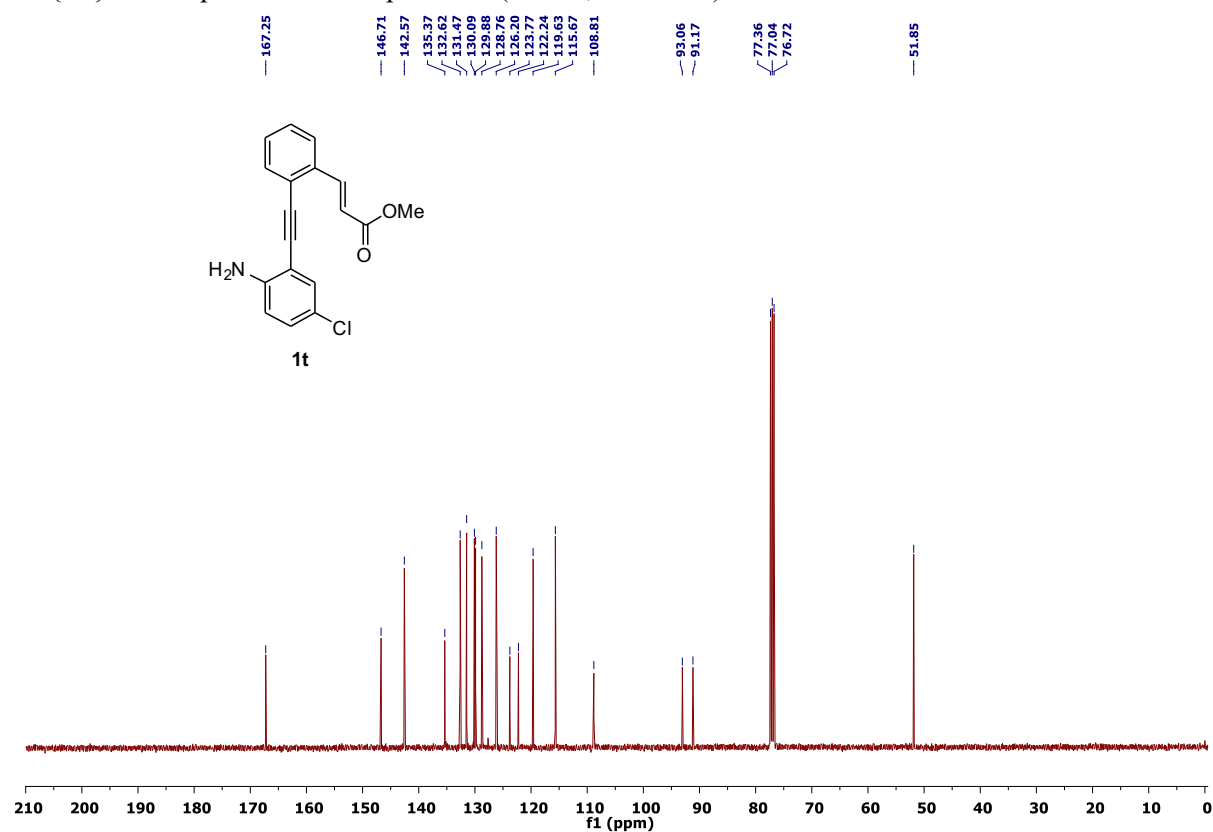

$^1\text{H}$  NMR spectrum of compound **2a** ( $\text{CDCl}_3$ , 400 MHz)

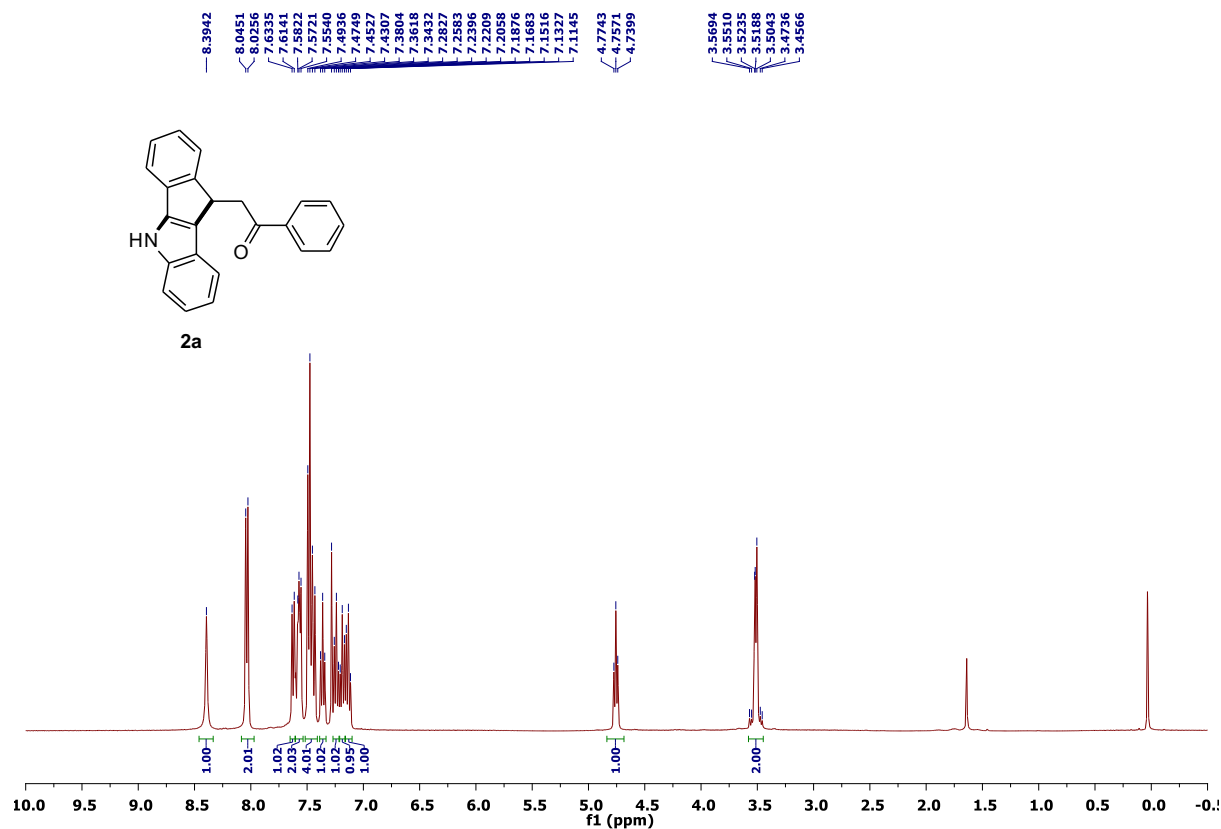

$^{13}\text{C}\{^1\text{H}\}$  NMR spectrum of compound **2a** ( $\text{CDCl}_3$ , 101 MHz)

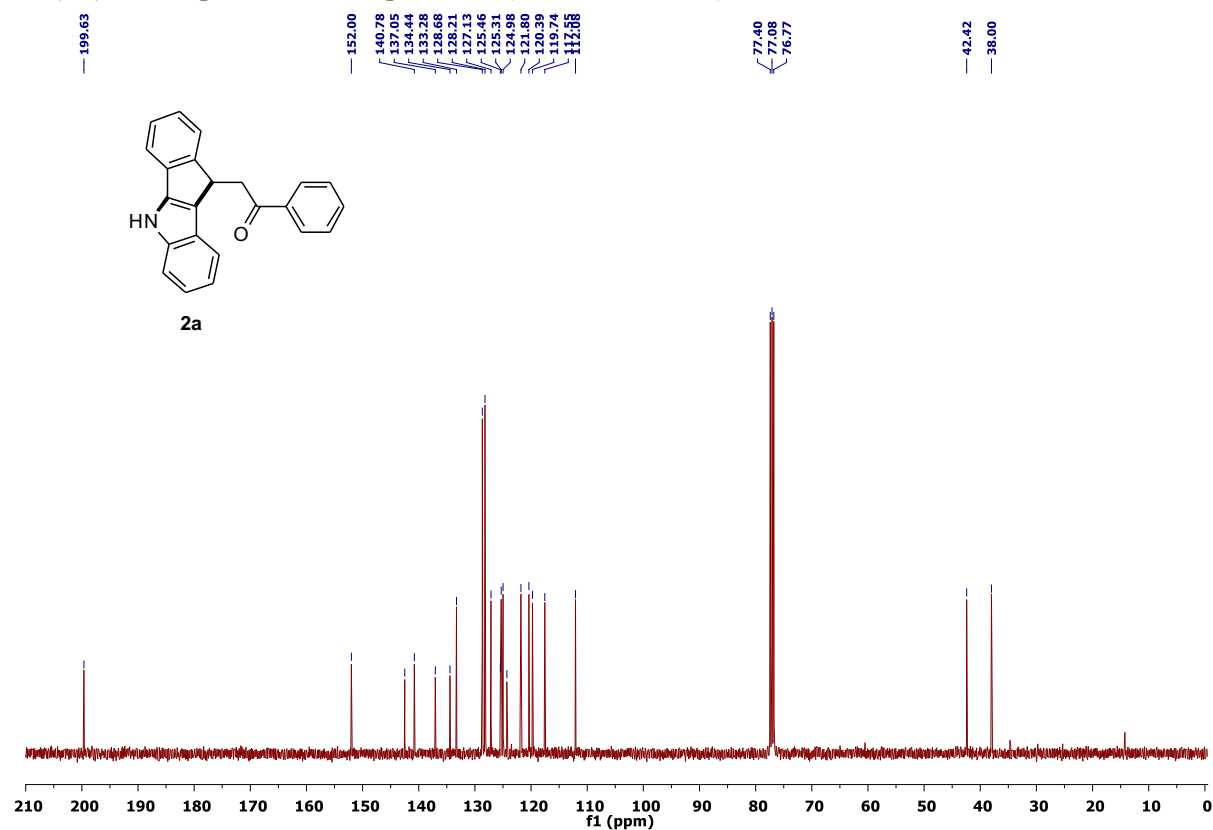

$^1\text{H}$  NMR spectrum of compound **2b** ( $\text{CDCl}_3$ , 400 MHz)

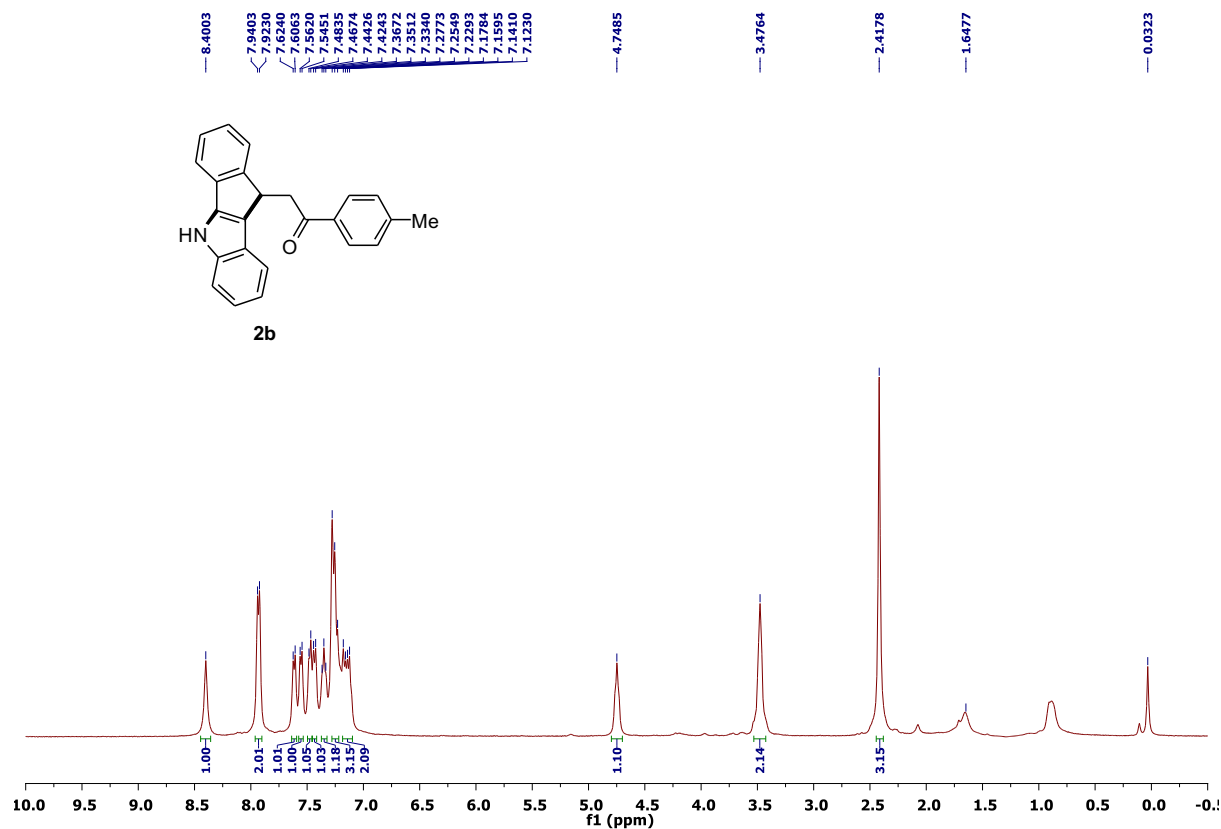

$^{13}\text{C}\{^1\text{H}\}$  NMR spectrum of compound **2b** ( $\text{CDCl}_3$ , 101 MHz)

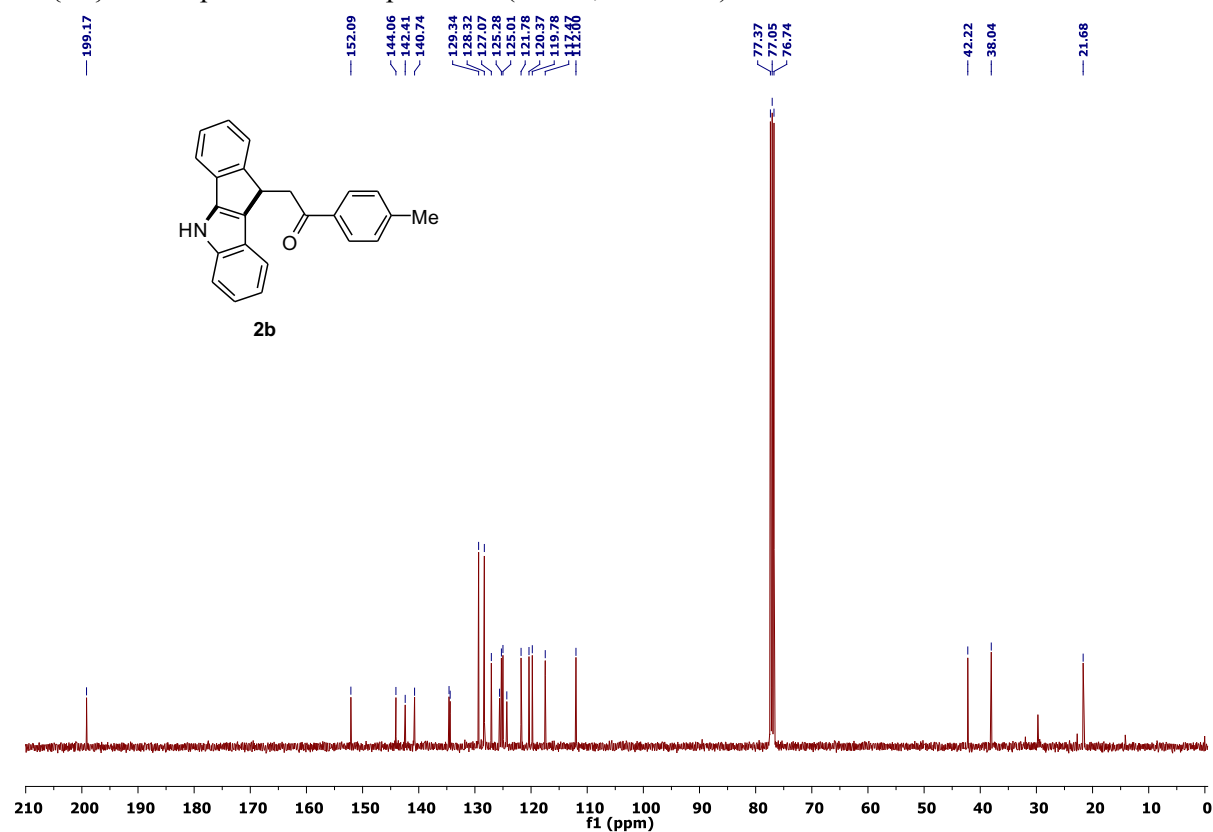

$^1\text{H}$  NMR spectrum of compound **2c** ( $\text{CDCl}_3$ , 400 MHz)

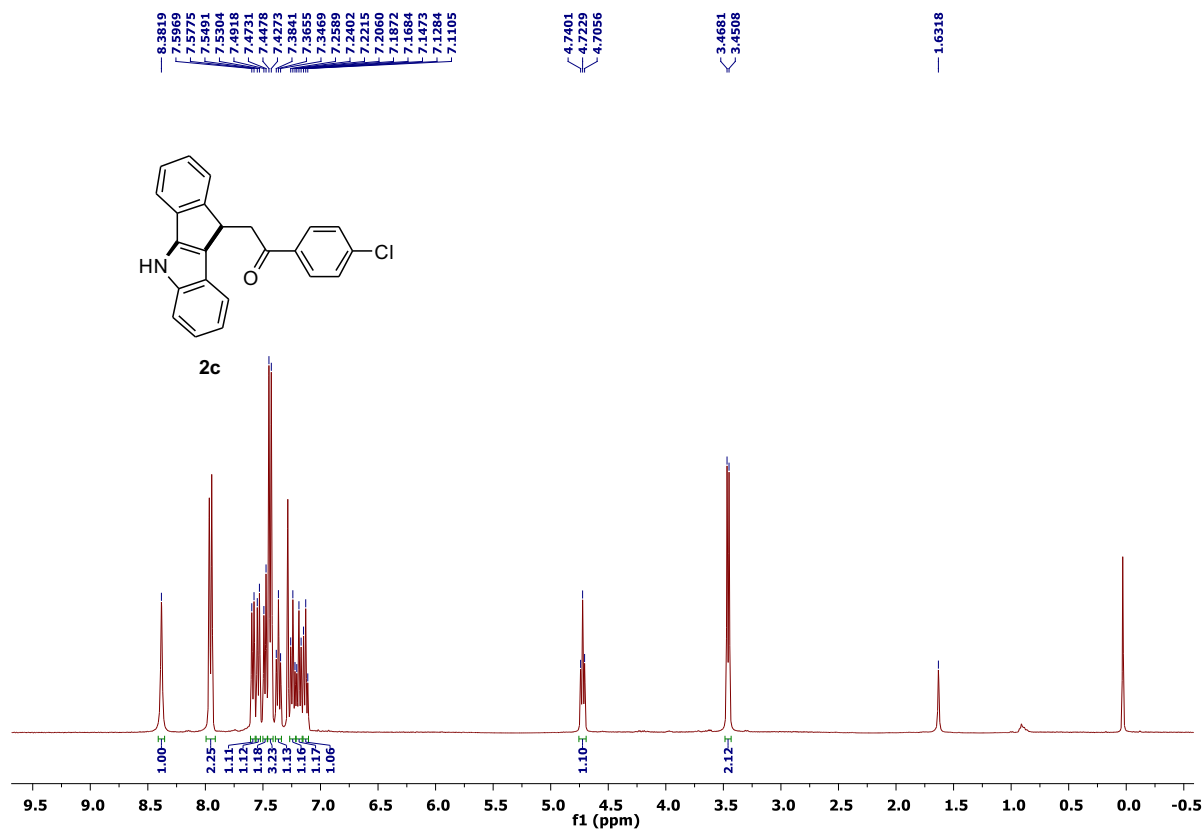

$^{13}\text{C}\{^1\text{H}\}$  NMR spectrum of compound **2c** ( $\text{CDCl}_3$ , 101 MHz)

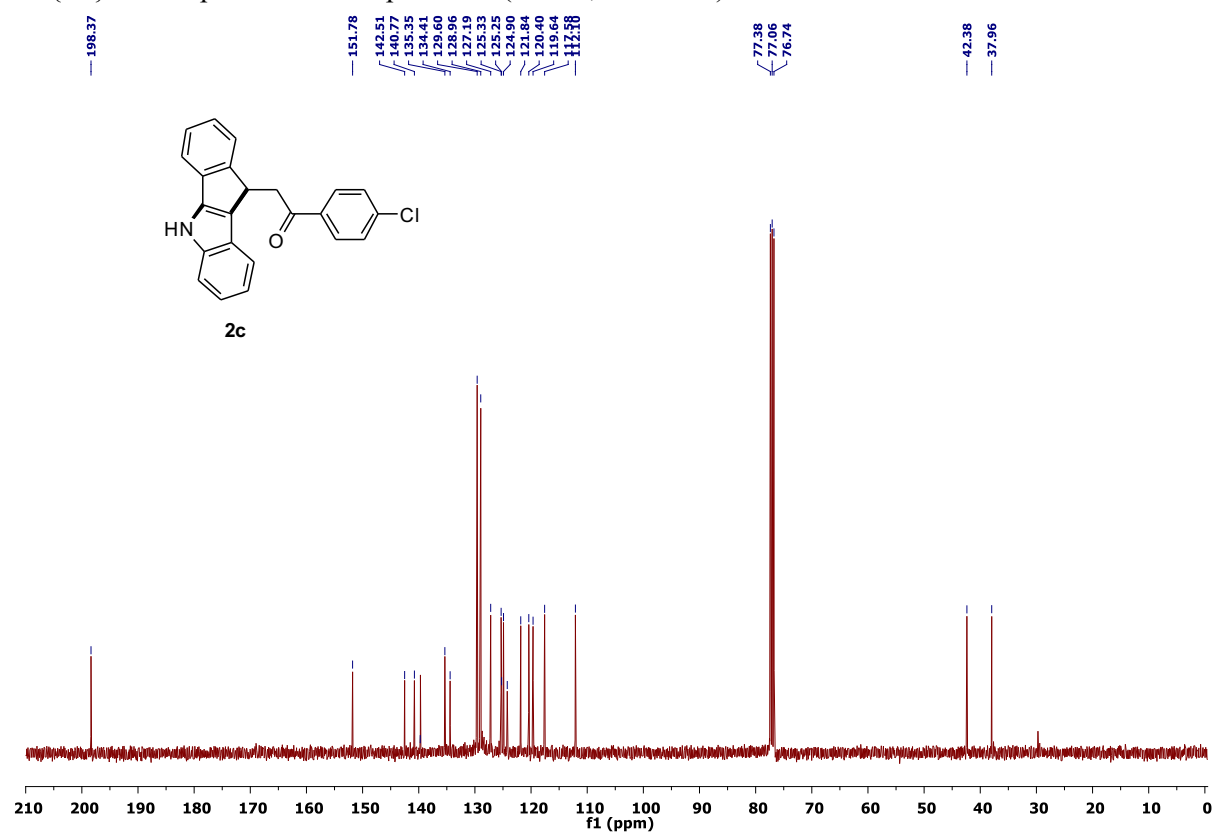

$^1\text{H}$  NMR spectrum of compound **2d** ( $\text{CDCl}_3$ , 400 MHz)

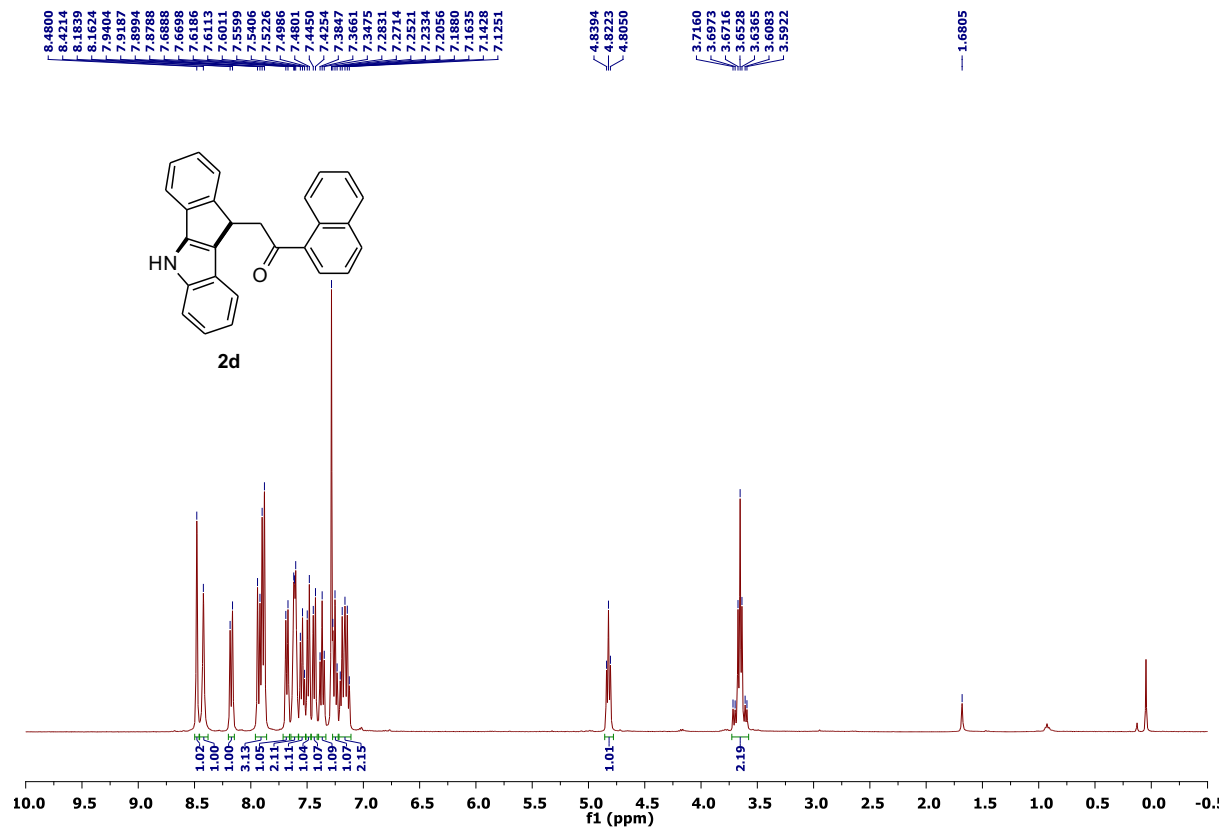

$^{13}\text{C}\{^1\text{H}\}$  NMR spectrum of compound **2d** ( $\text{CDCl}_3$ , 101 MHz)

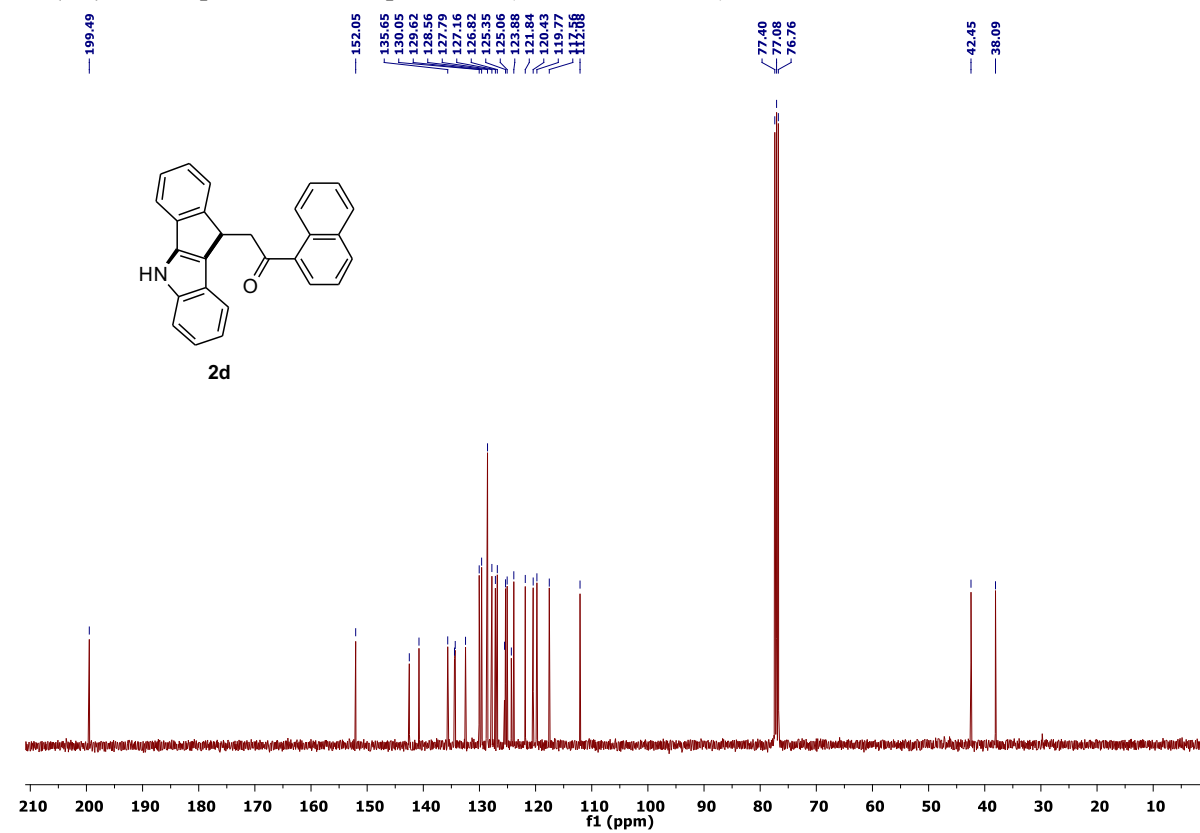



$^1\text{H}$  NMR spectrum of compound **2e** ( $\text{CDCl}_3$ , 400 MHz)

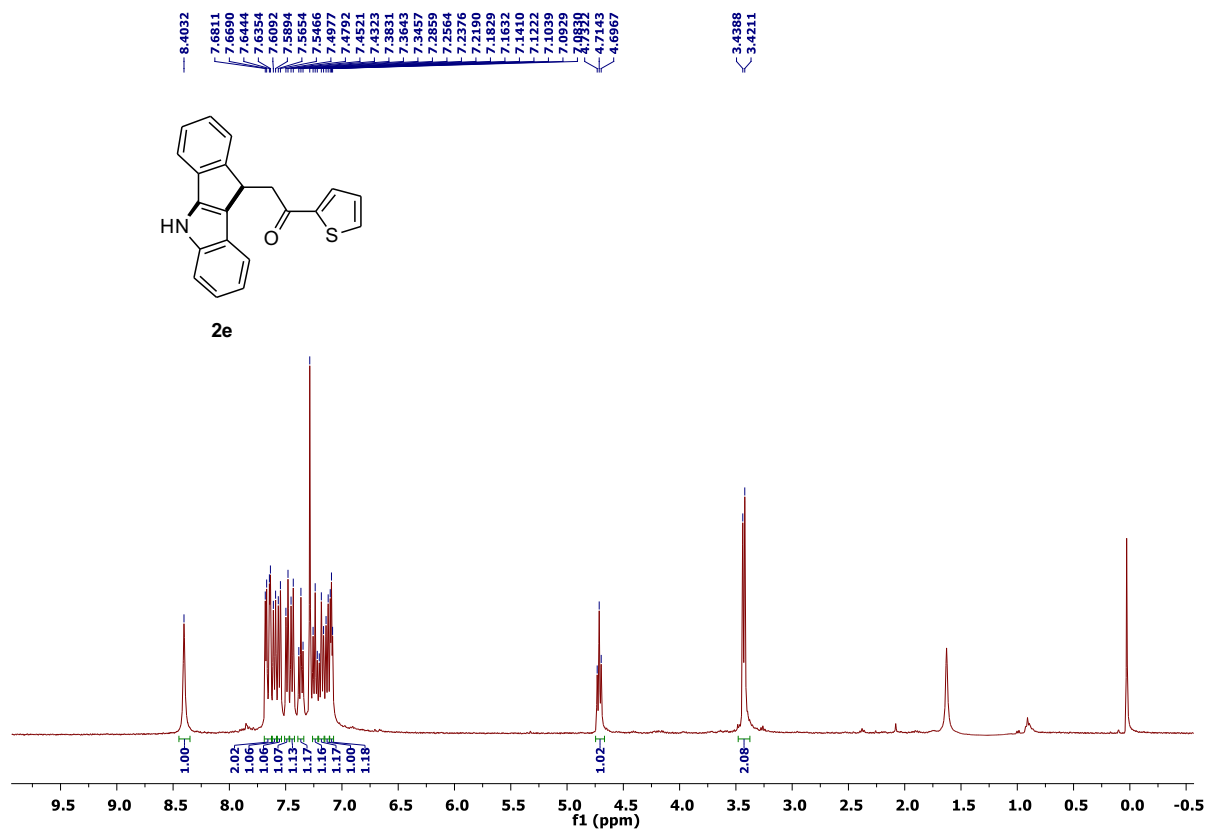

$^{13}\text{C}\{^1\text{H}\}$  NMR spectrum of compound **2e** ( $\text{CDCl}_3$ , 101 MHz)

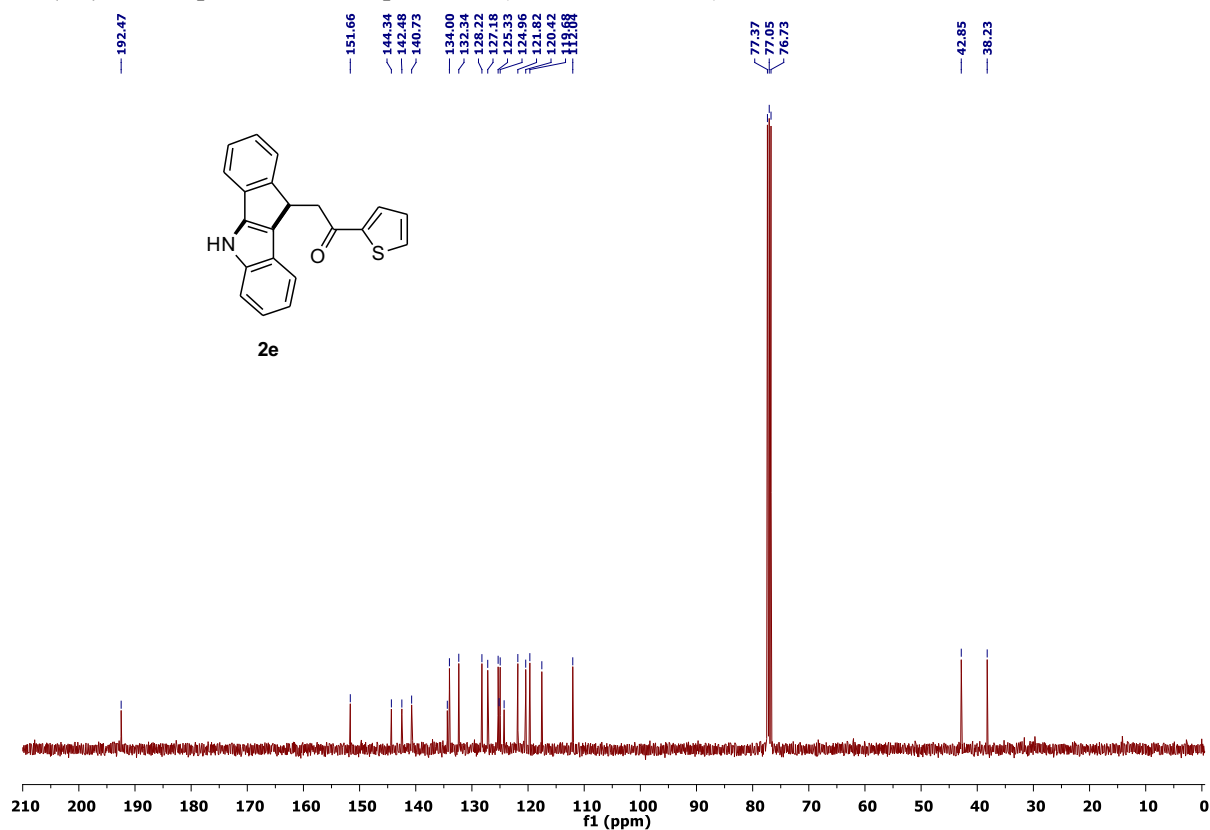

$^1\text{H}$  NMR spectrum of compound **2f** ( $\text{CDCl}_3$ , 400 MHz)

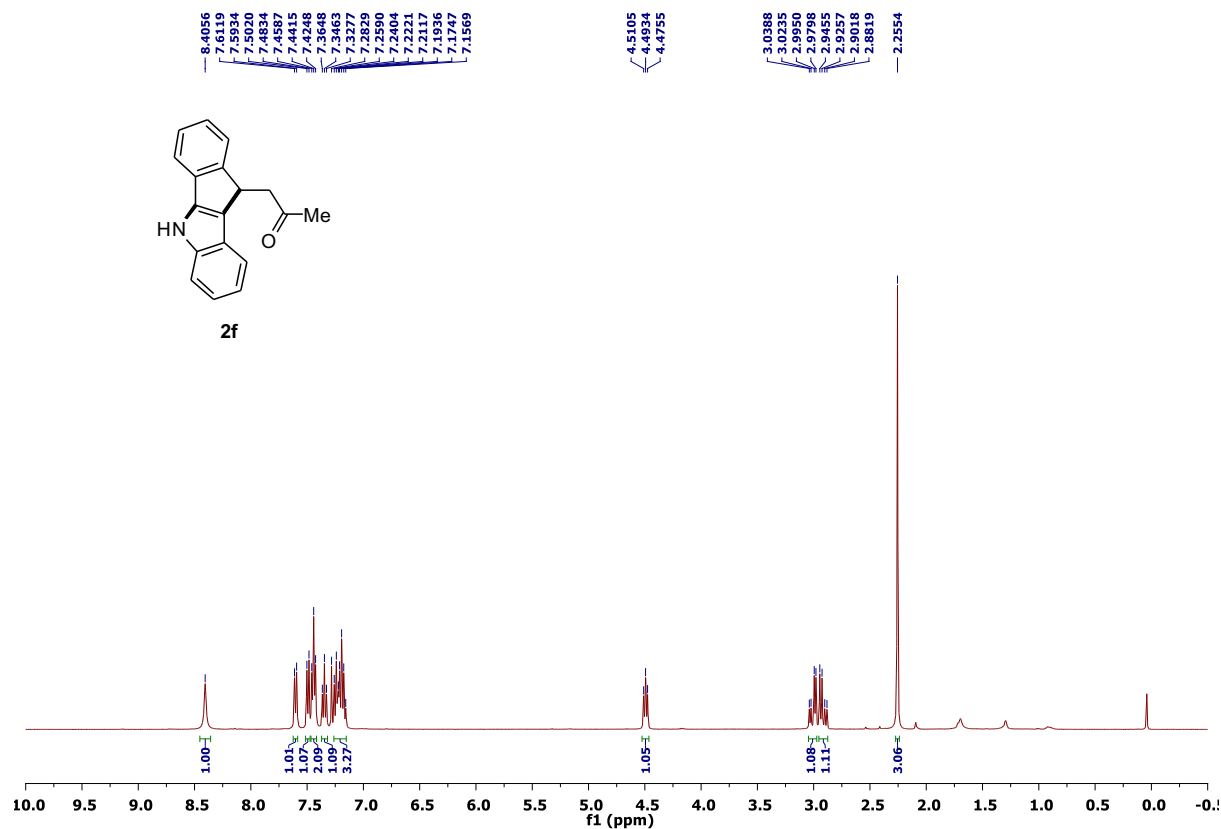

$^{13}\text{C}\{^1\text{H}\}$  NMR spectrum of compound **2f** ( $\text{CDCl}_3$ , 101 MHz)

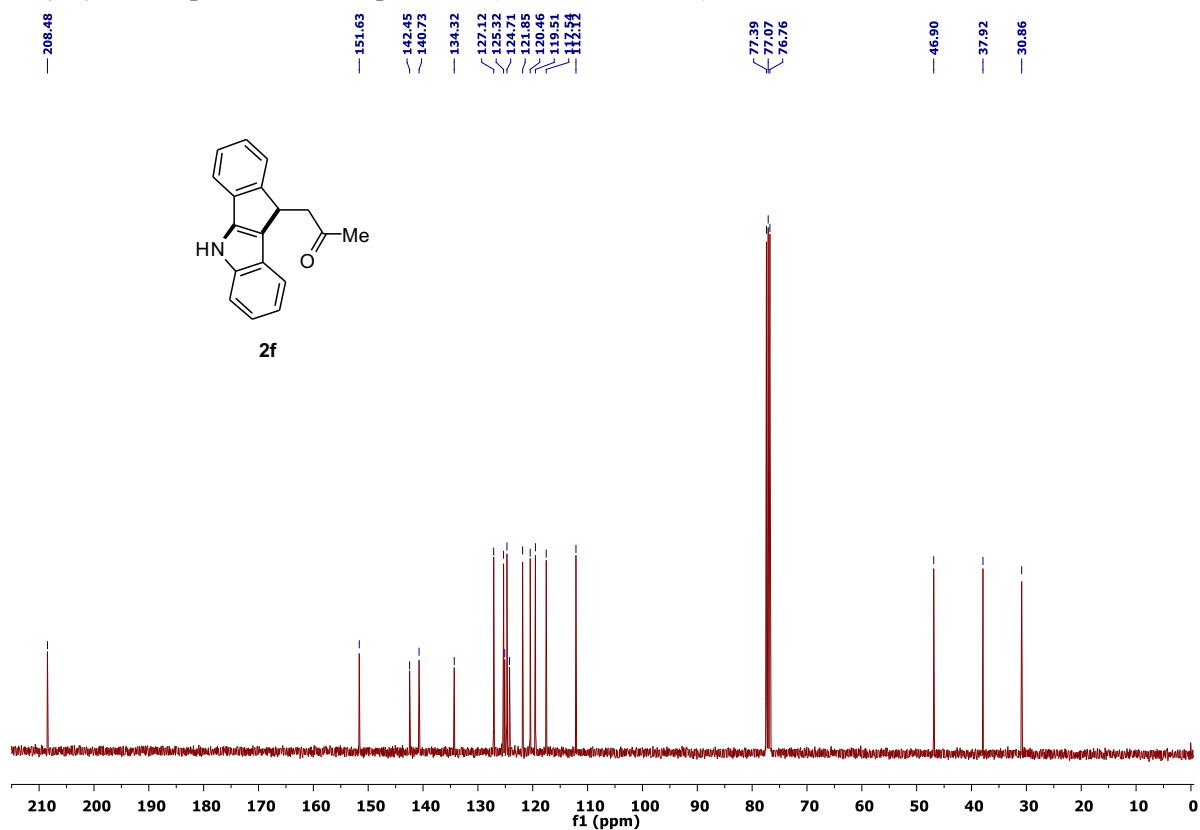

$^1\text{H}$  NMR spectrum of compound **2g** ( $\text{CDCl}_3$ , 400 MHz)

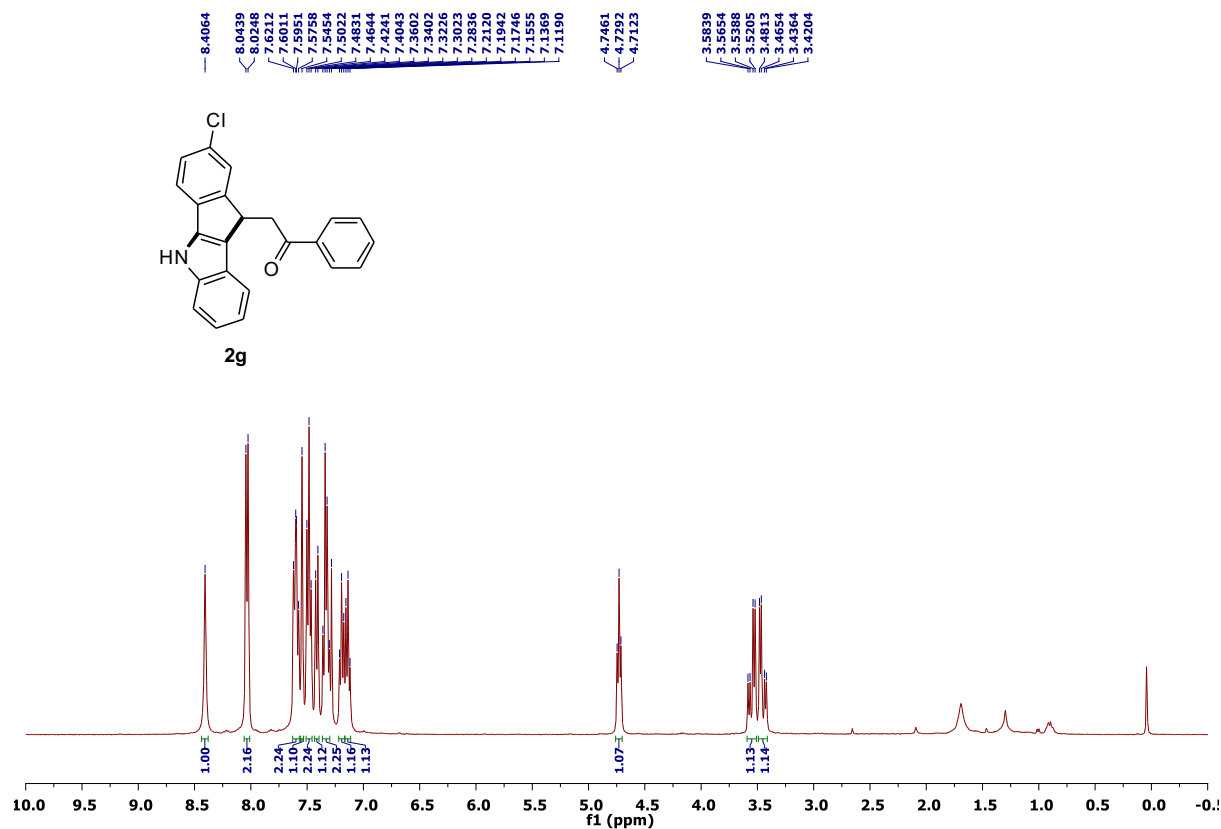

$^{13}\text{C}\{^1\text{H}\}$  NMR spectrum of compound **2g** ( $\text{CDCl}_3$ , 101 MHz)

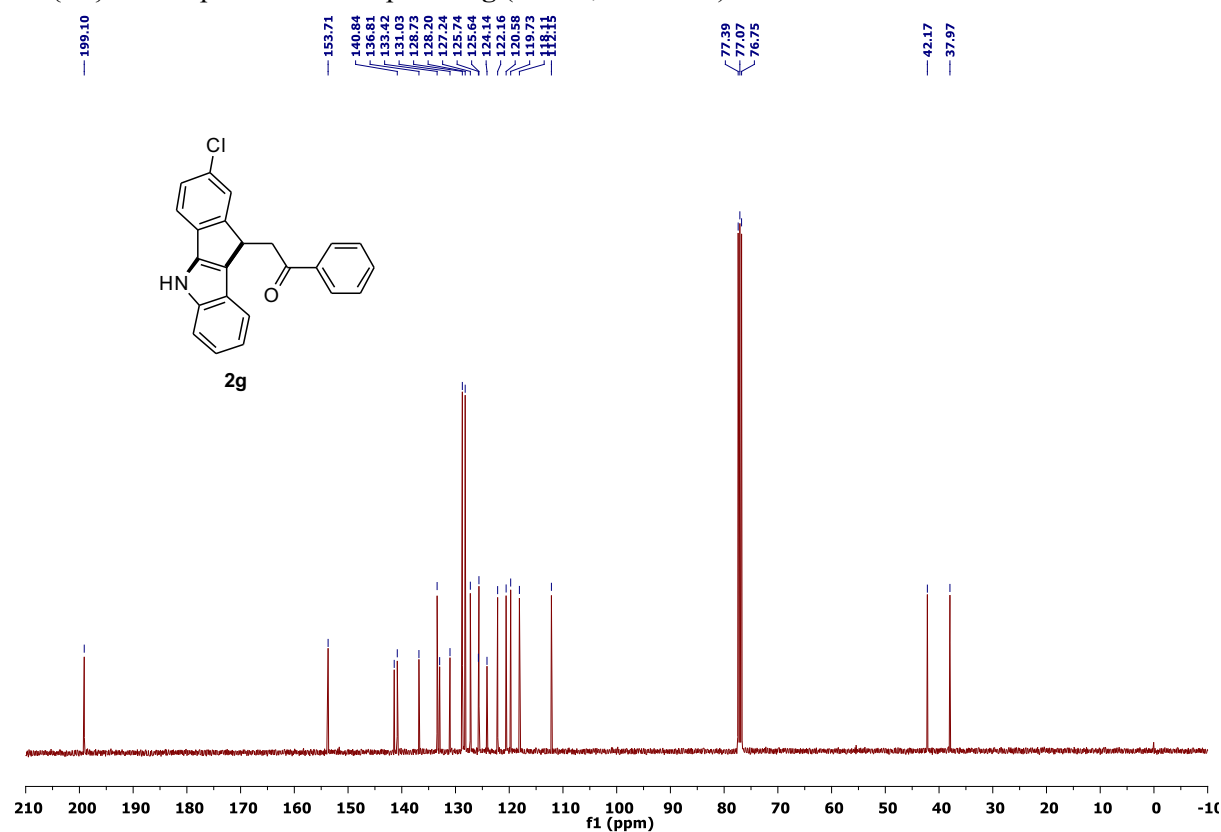

$^1\text{H}$  NMR spectrum of compound **2h** ( $\text{CDCl}_3$ , 400 MHz)

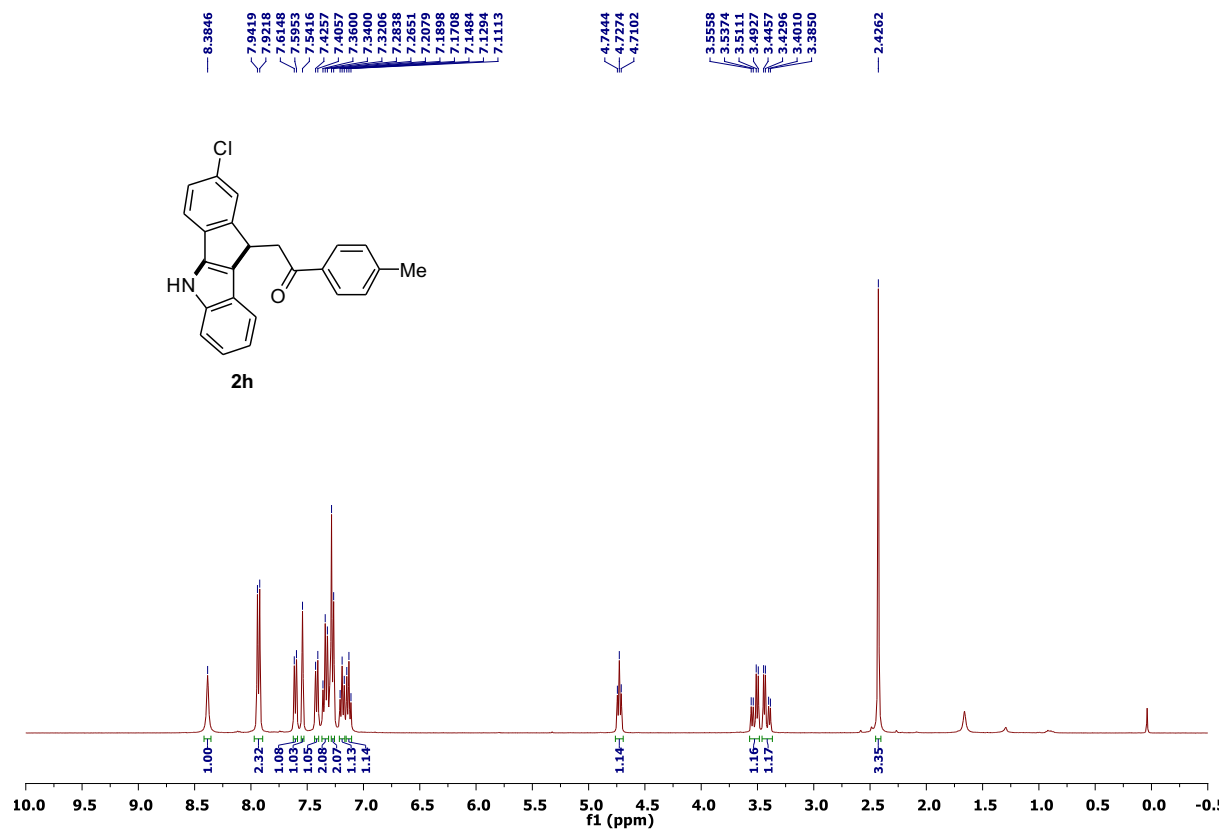

$^{13}\text{C}\{^1\text{H}\}$  NMR spectrum of compound **2h** ( $\text{CDCl}_3$ , 101 MHz)

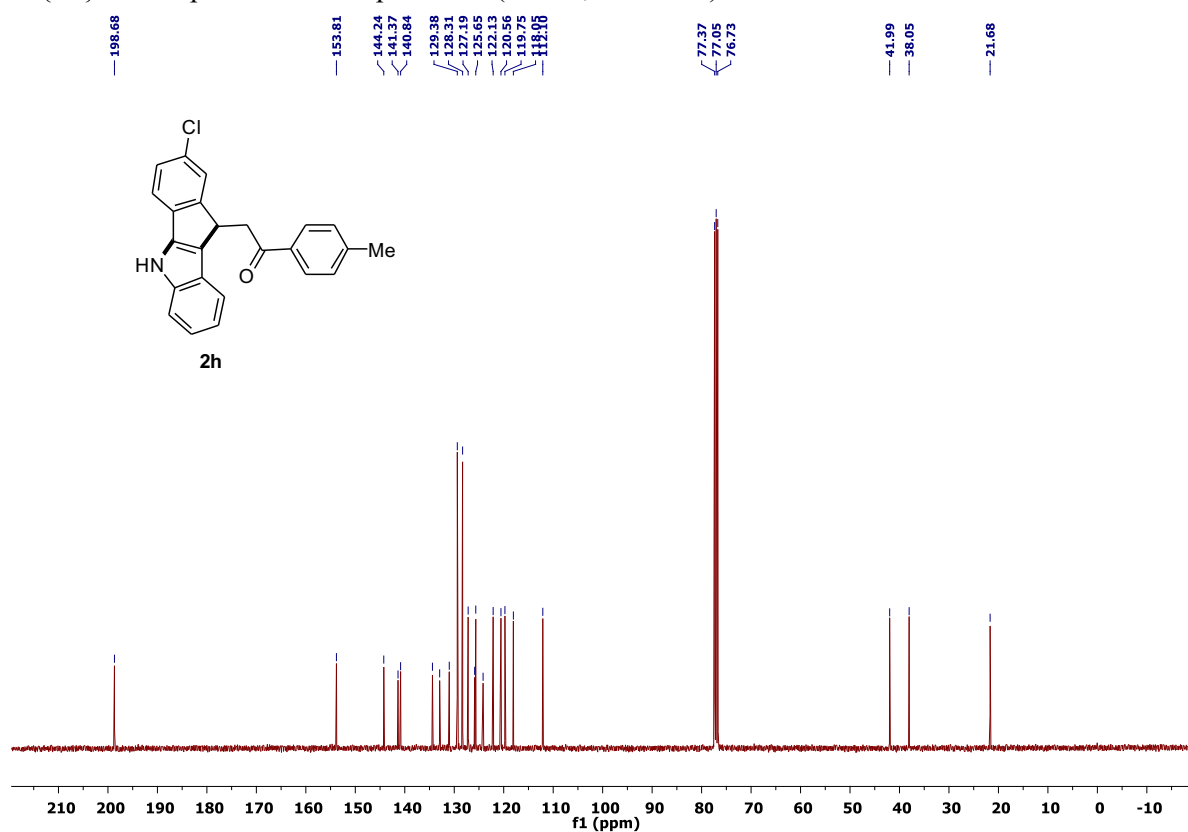

$^1\text{H}$  NMR spectrum of compound **2i** ( $\text{CDCl}_3$ , 400 MHz)

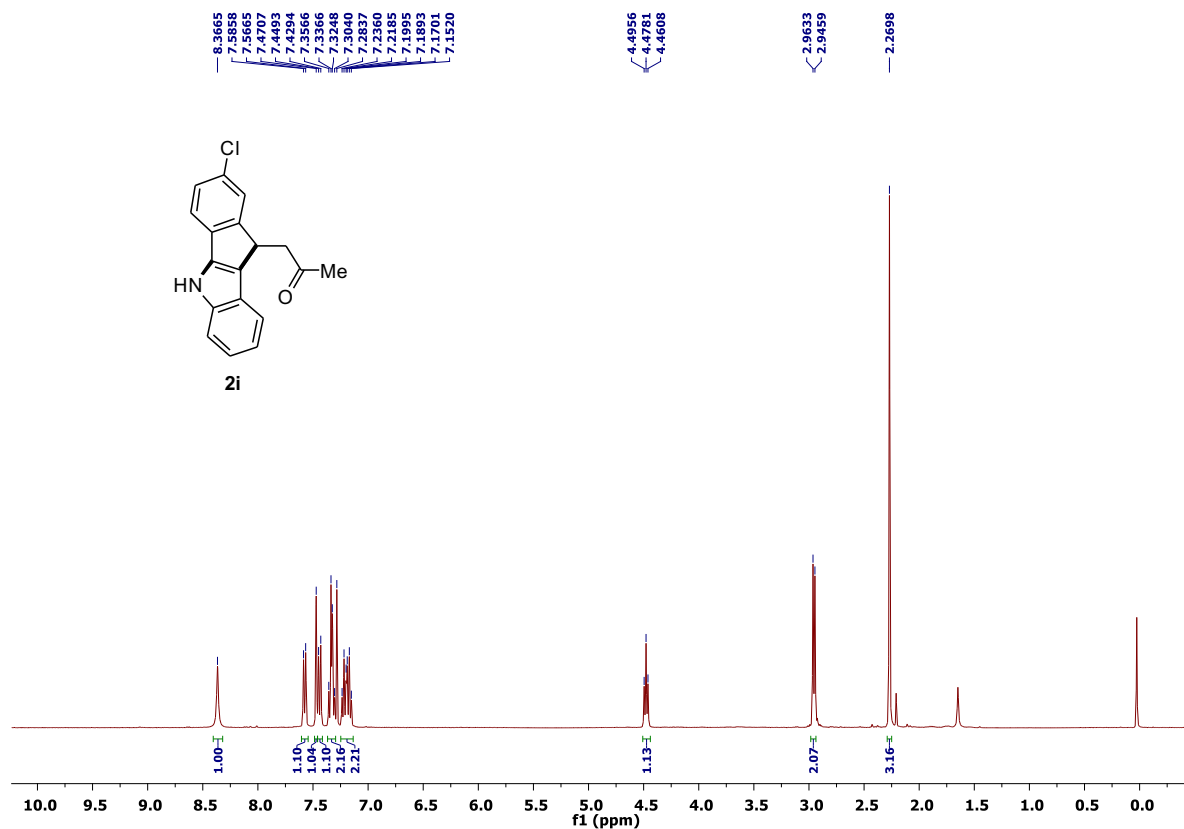

$^{13}\text{C}\{^1\text{H}\}$  NMR spectrum of compound **2i** ( $\text{CDCl}_3$ , 101 MHz)

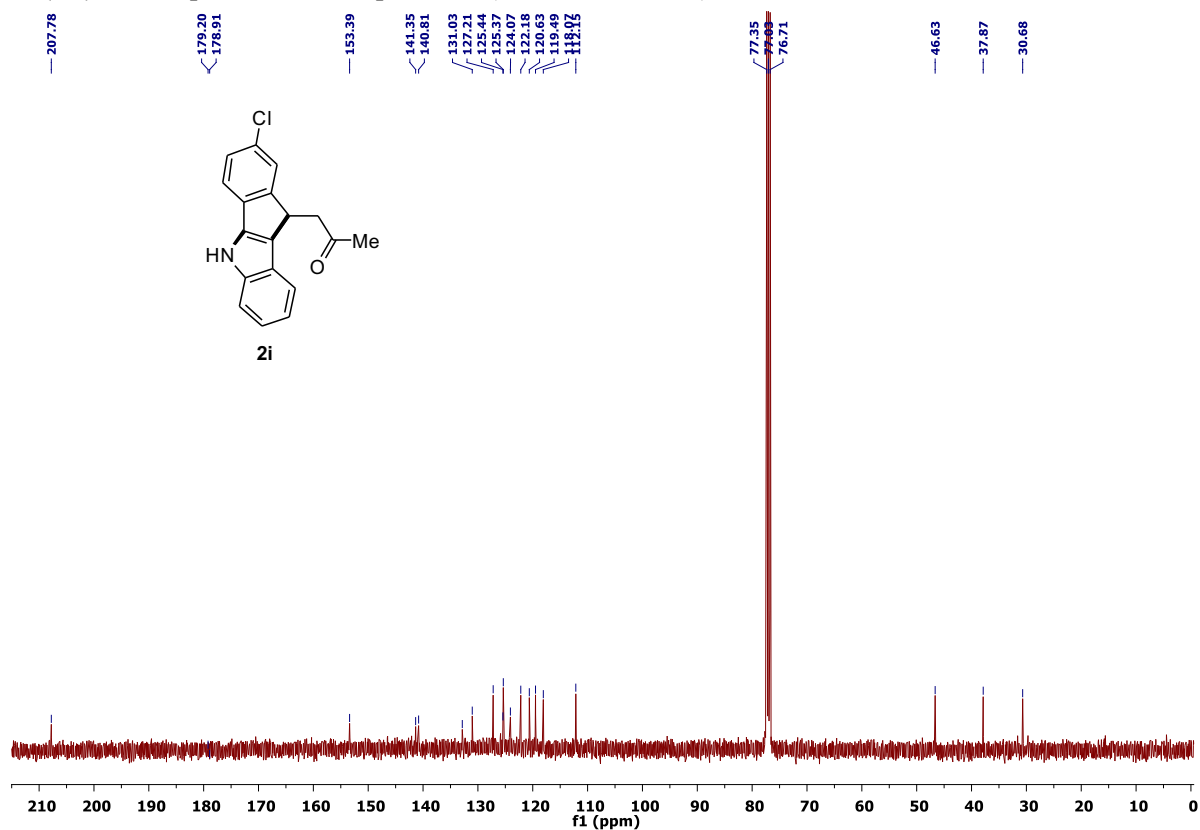

$^1\text{H}$  NMR spectrum of compound **2j** ( $\text{CDCl}_3$ , 400 MHz)

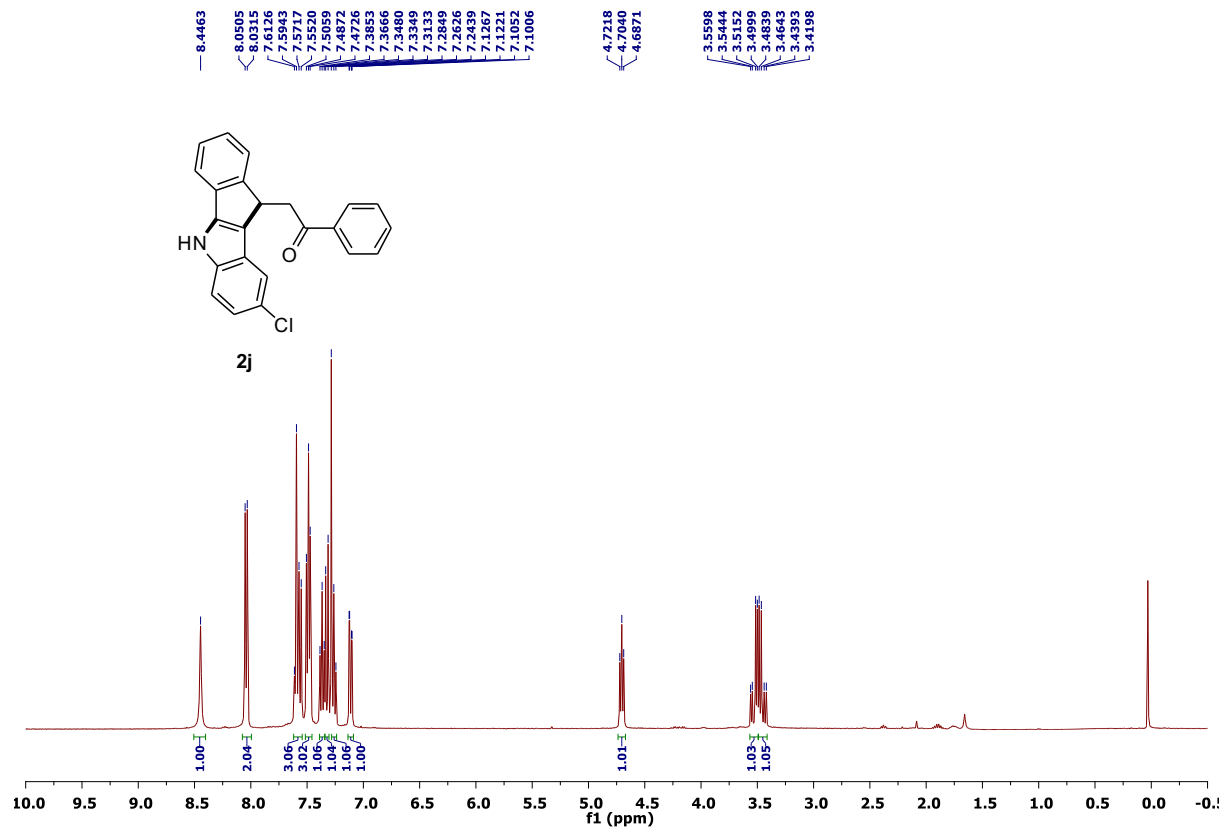

$^{13}\text{C}\{^1\text{H}\}$  NMR spectrum of compound **2j** ( $\text{CDCl}_3$ , 101 MHz)

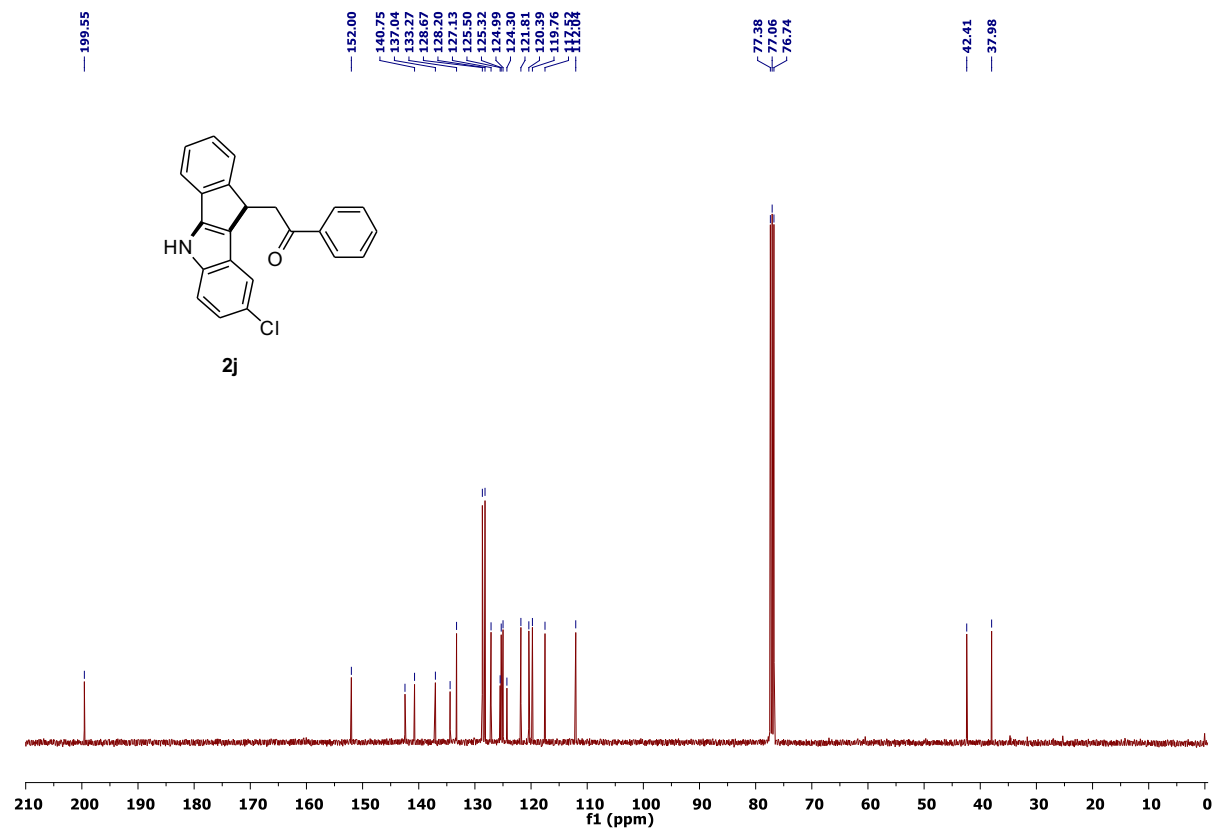

$^1\text{H}$  NMR spectrum of compound **2k** ( $\text{CDCl}_3$ , 400 MHz)

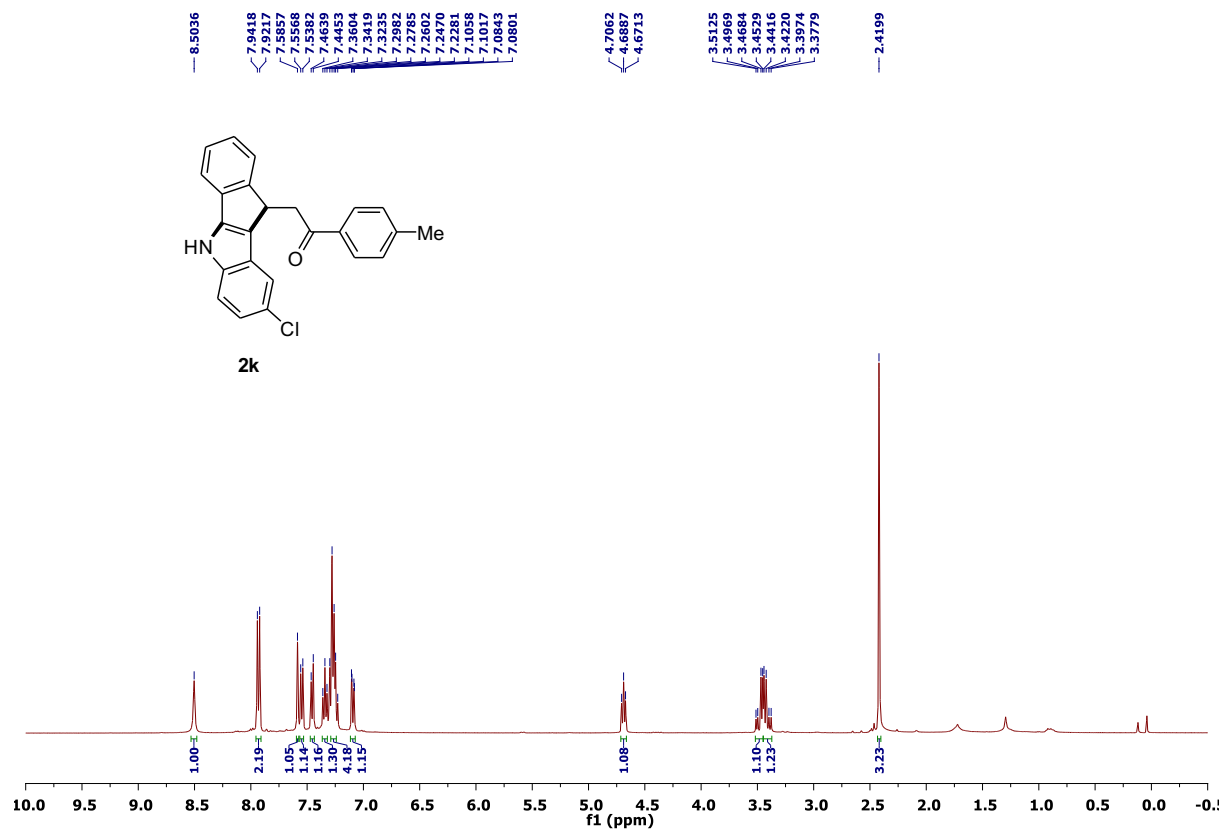

$^{13}\text{C}\{^1\text{H}\}$  NMR spectrum of compound **2k** ( $\text{CDCl}_3$ , 101 MHz)

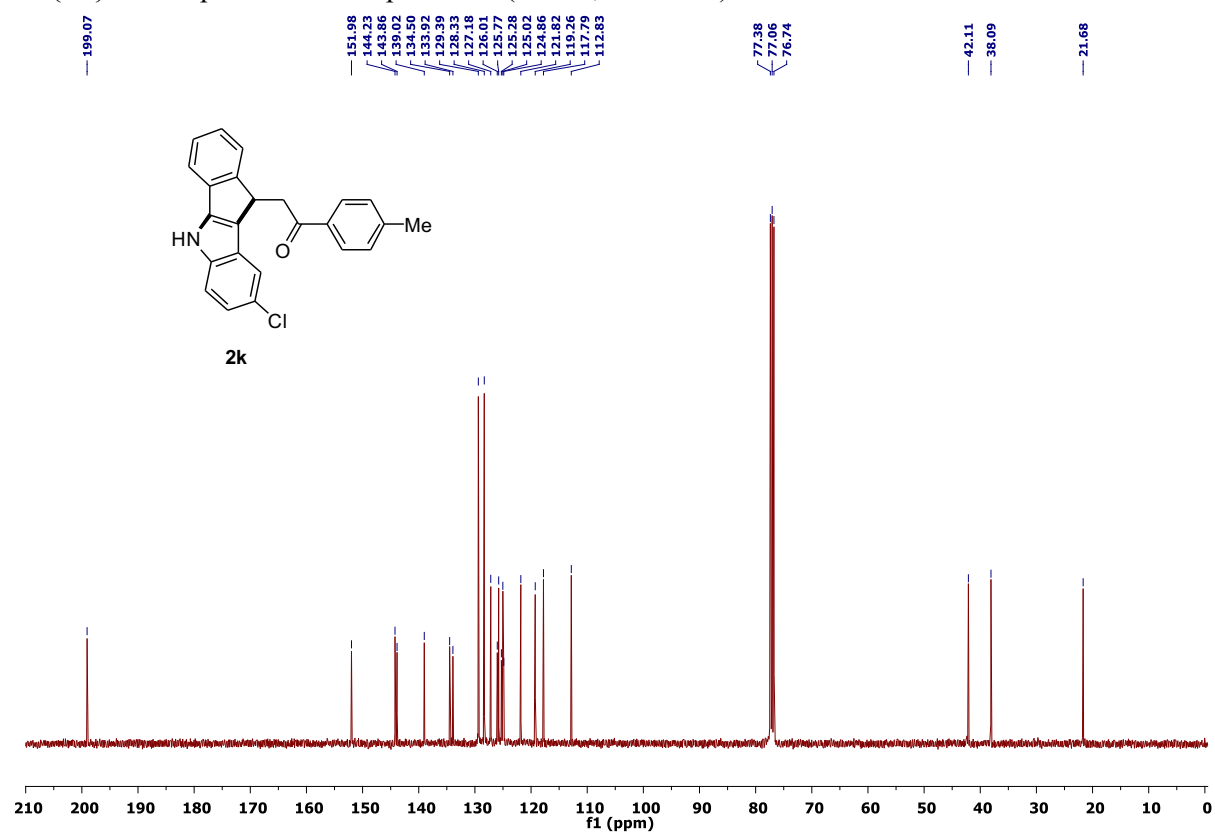

$^1\text{H}$  NMR spectrum of compound **21** ( $\text{CDCl}_3$ , 400 MHz)

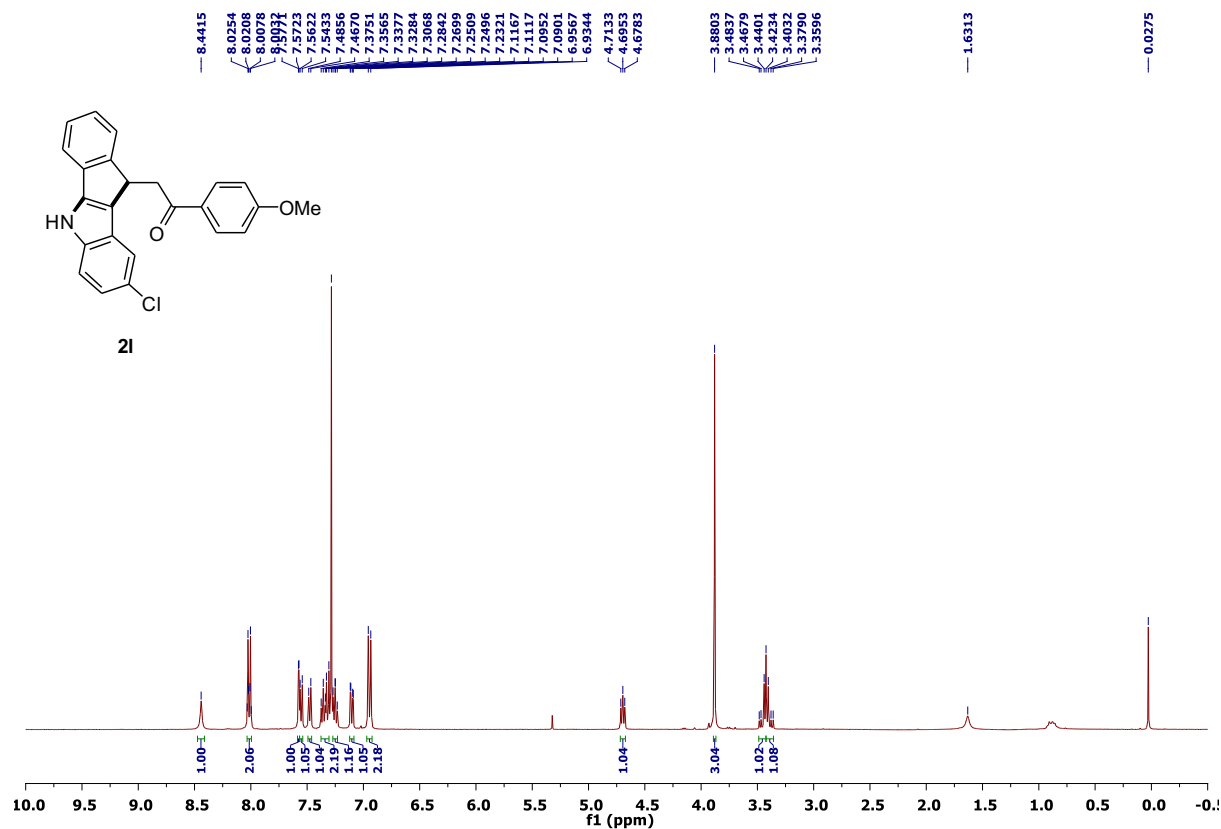

$^{13}\text{C}\{^1\text{H}\}$  NMR spectrum of compound **21** ( $\text{CDCl}_3$ , 101 MHz)

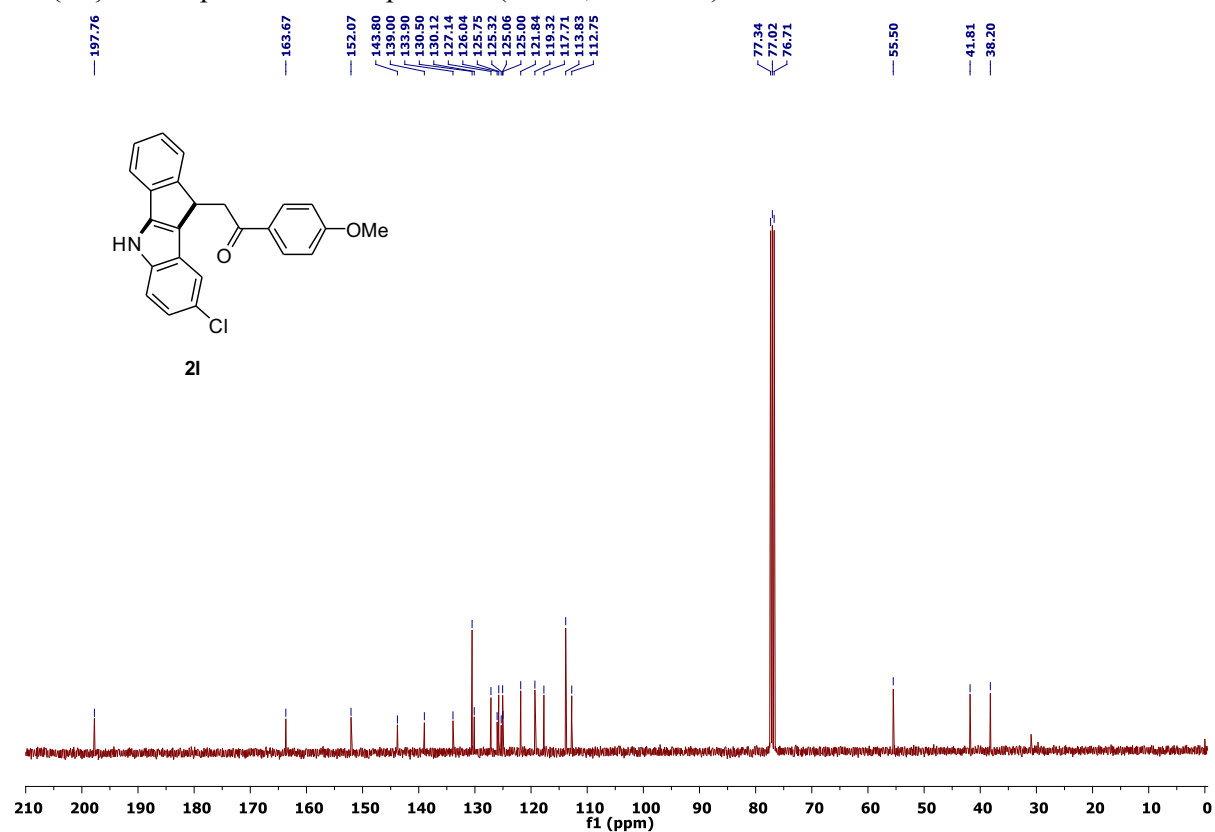



$^1\text{H}$  NMR spectrum of compound **2m** ( $\text{CDCl}_3$ , 400 MHz)

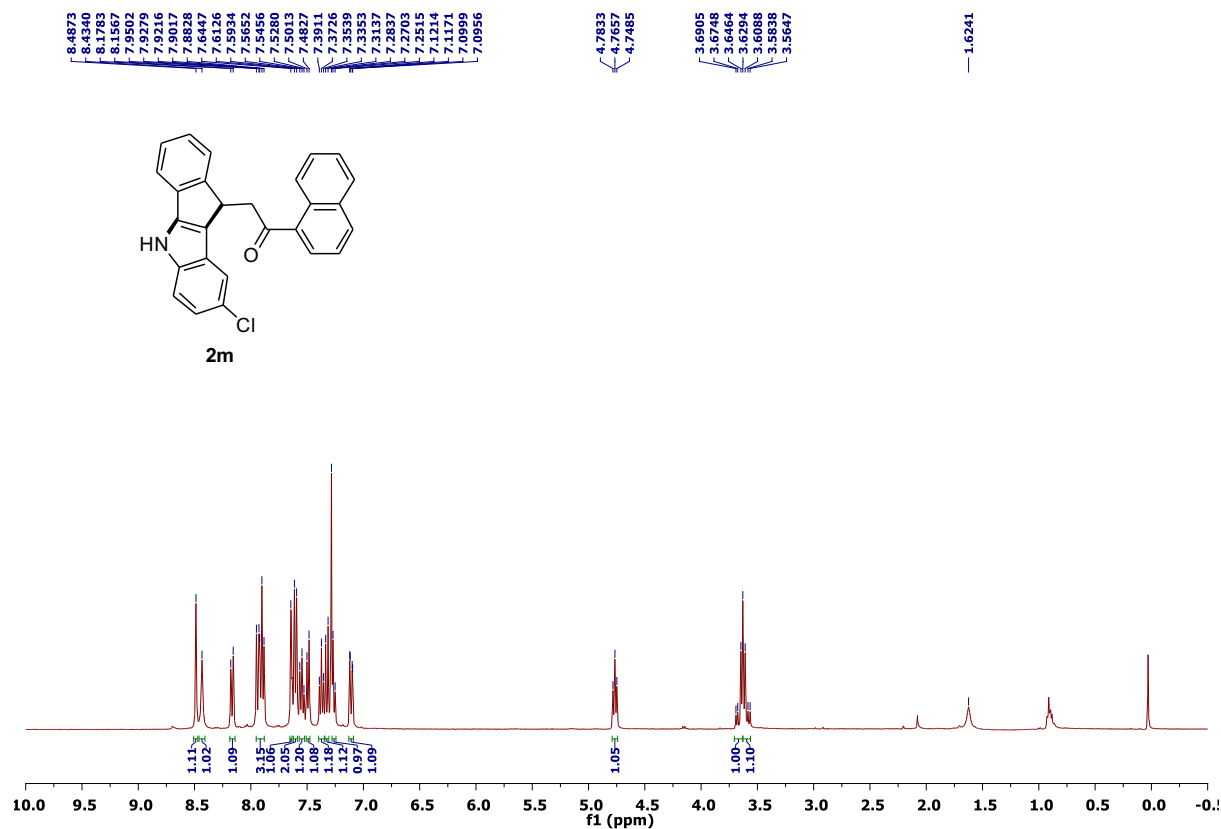

$^{13}\text{C}\{^1\text{H}\}$  NMR spectrum of compound **2m** ( $\text{CDCl}_3$ , 101 MHz)

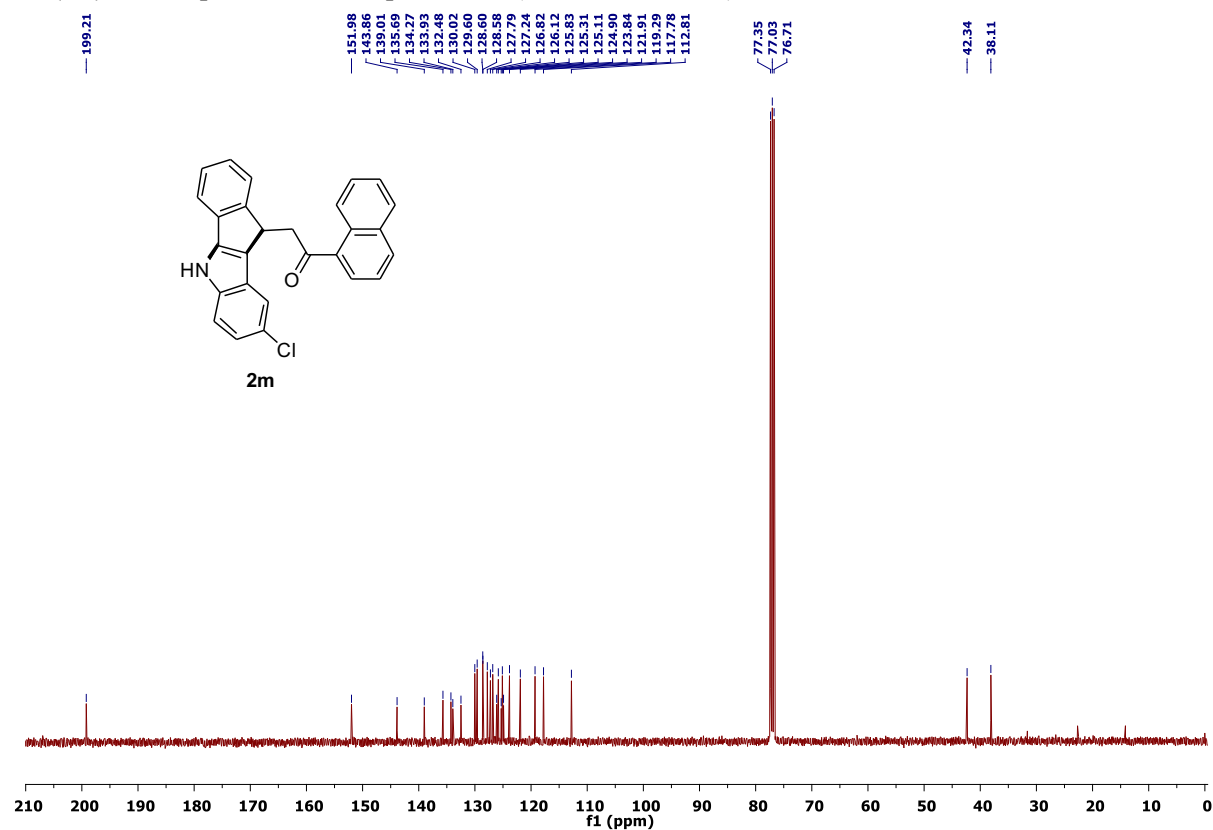

$^1\text{H}$  NMR spectrum of compound **2n** ( $\text{CDCl}_3$ , 400 MHz)

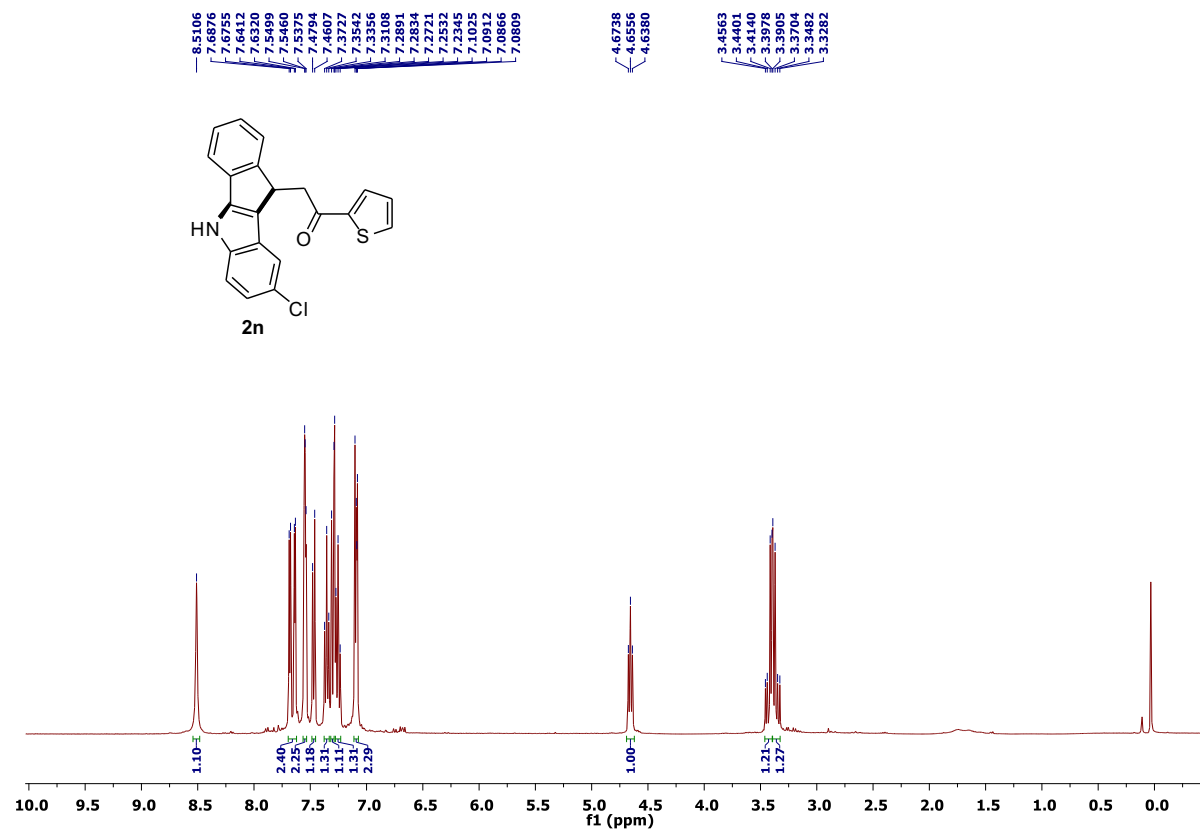

$^{13}\text{C}\{^1\text{H}\}$  NMR spectrum of compound **2n** ( $\text{CDCl}_3$ , 101 MHz)

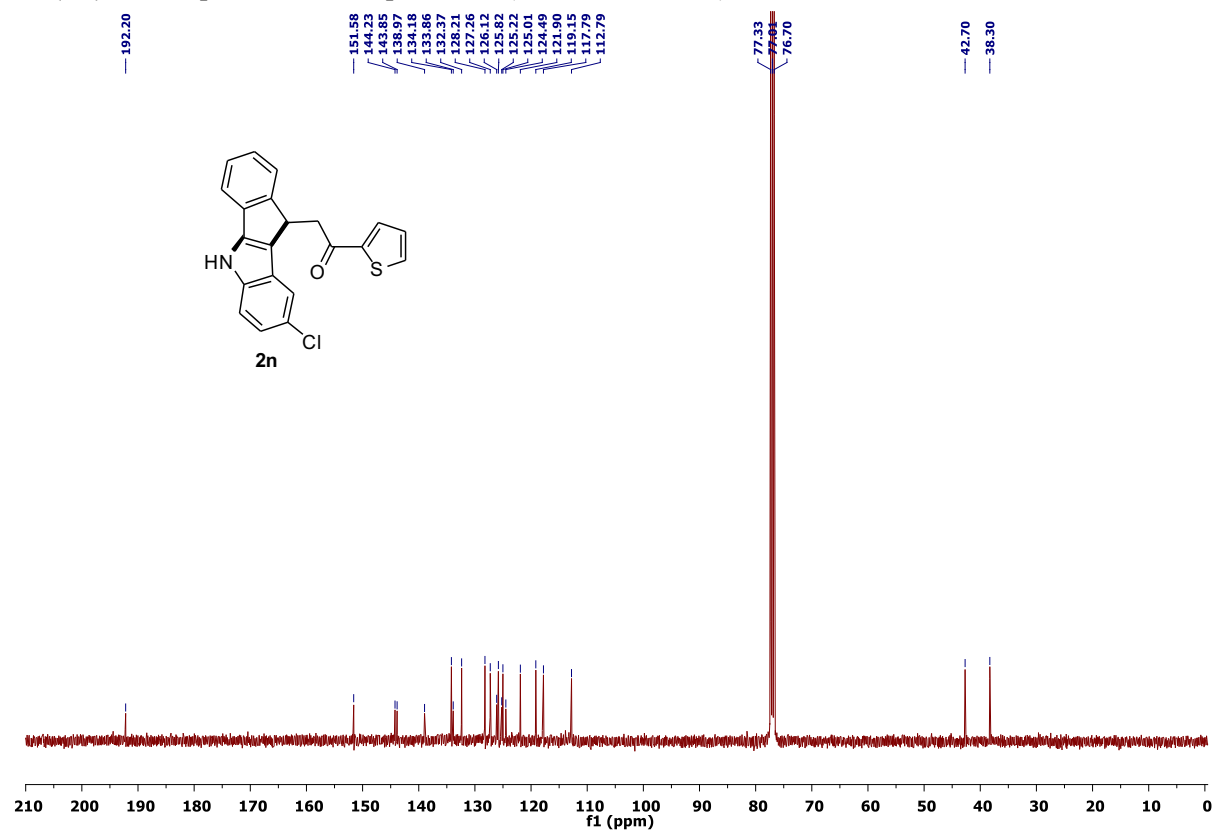

$^1\text{H}$  NMR spectrum of compound **2o** ( $\text{CDCl}_3$ , 400 MHz)

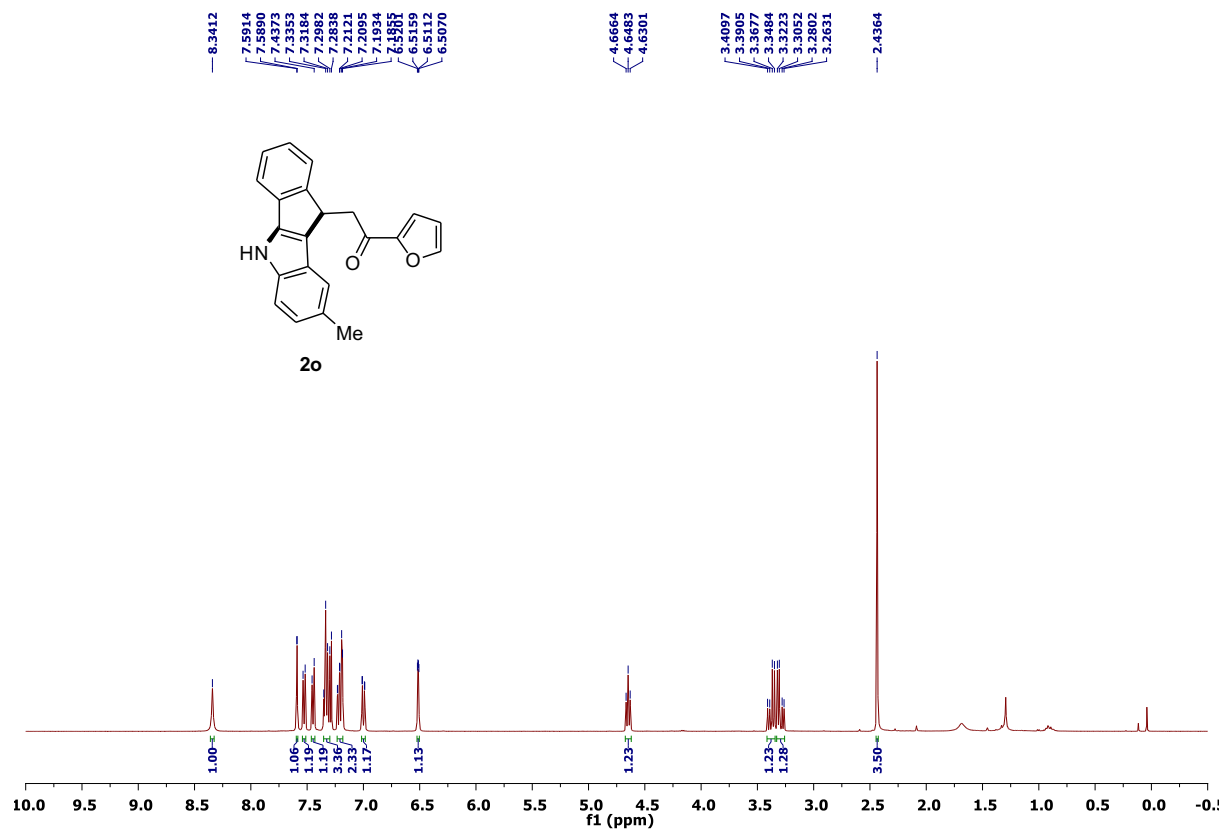

$^{13}\text{C}\{^1\text{H}\}$  NMR spectrum of compound **2o** ( $\text{CDCl}_3$ , 101 MHz)

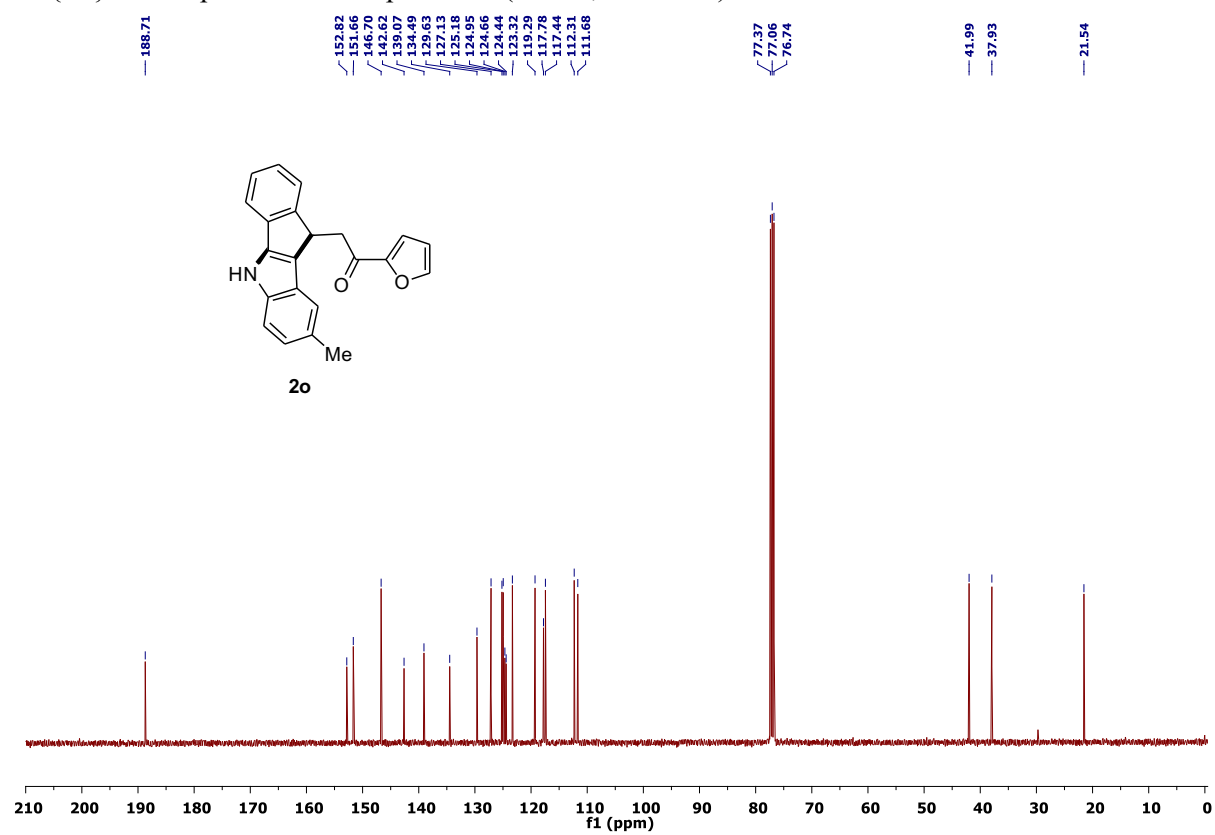

$^1\text{H}$  NMR spectrum of compound **2p** ( $\text{CDCl}_3$ , 400 MHz)

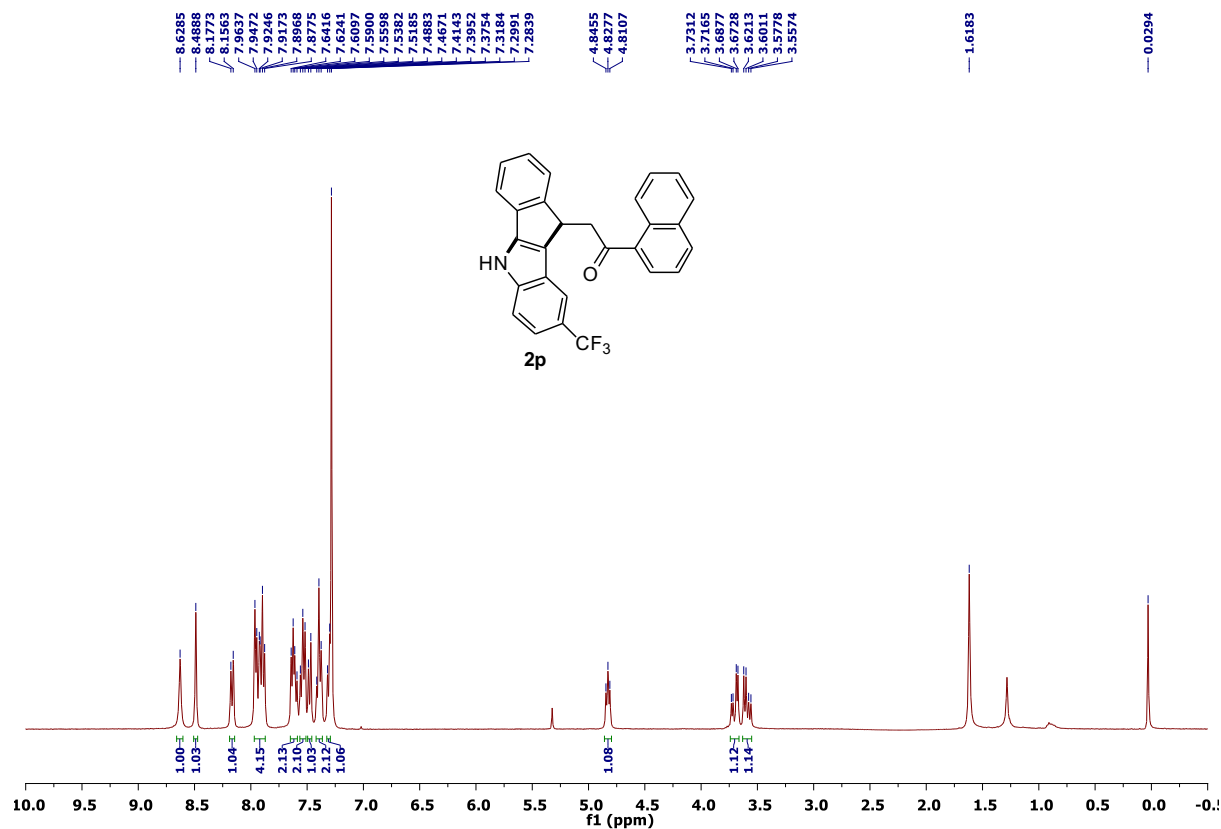

$^{13}\text{C}\{^1\text{H}\}$  NMR spectrum of compound **2p** ( $\text{CDCl}_3$ , 101 MHz)

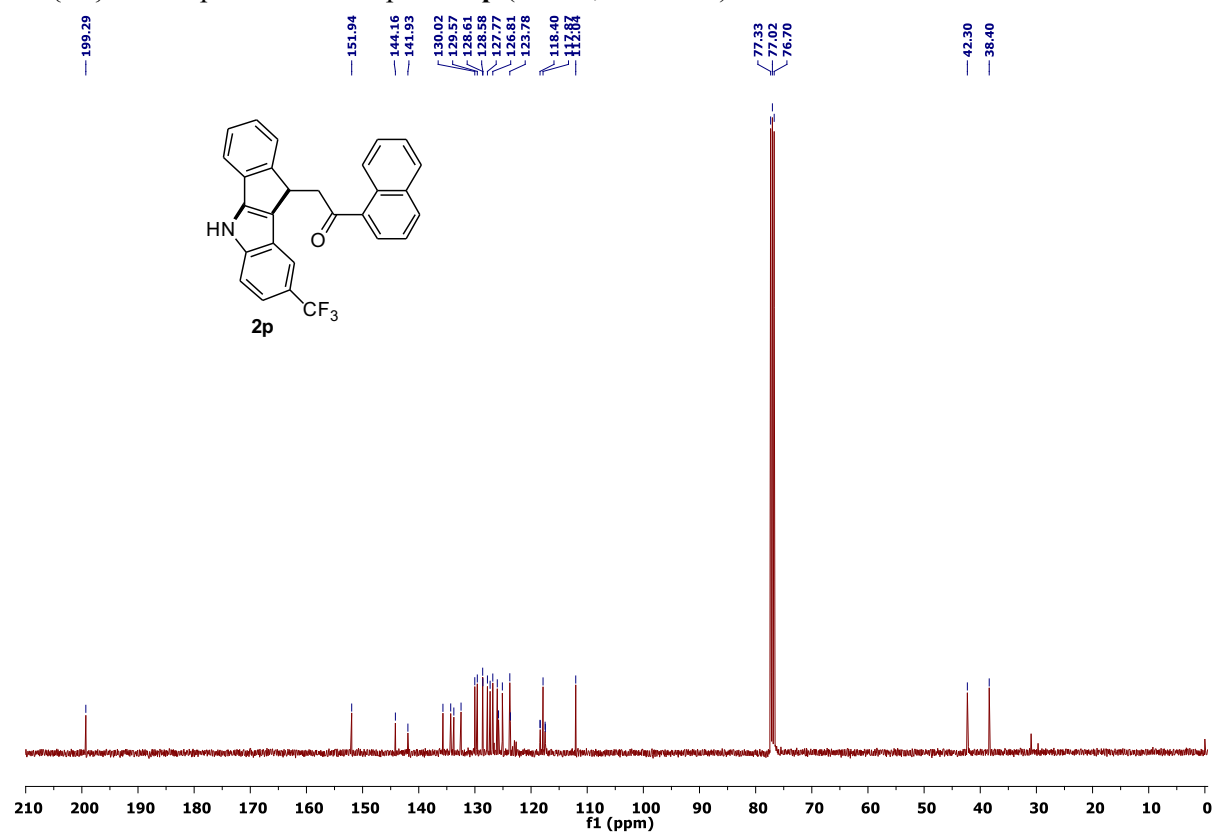

$^1\text{H}$  NMR spectrum of compound **2q** ( $\text{CDCl}_3$ , 400 MHz)

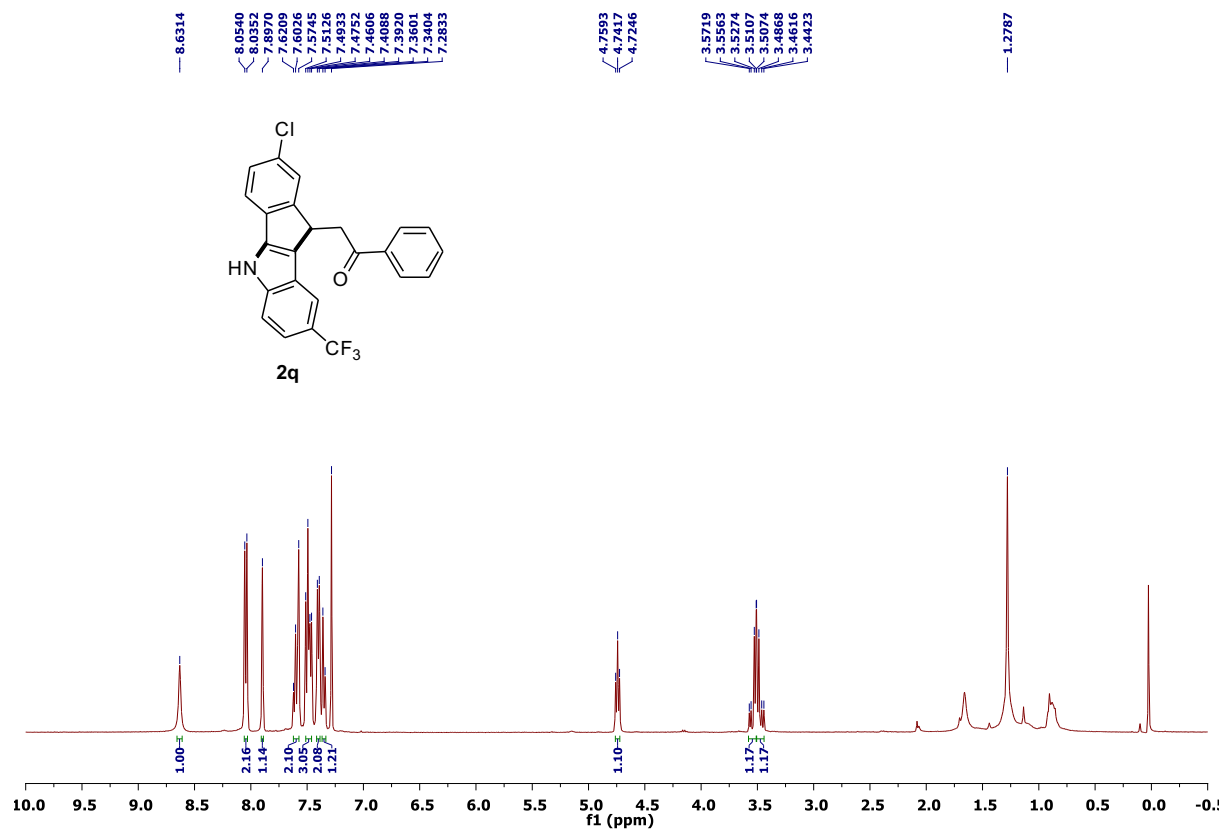

$^{13}\text{C}\{^1\text{H}\}$  NMR spectrum of compound **2q** ( $\text{CDCl}_3$ , 101 MHz)

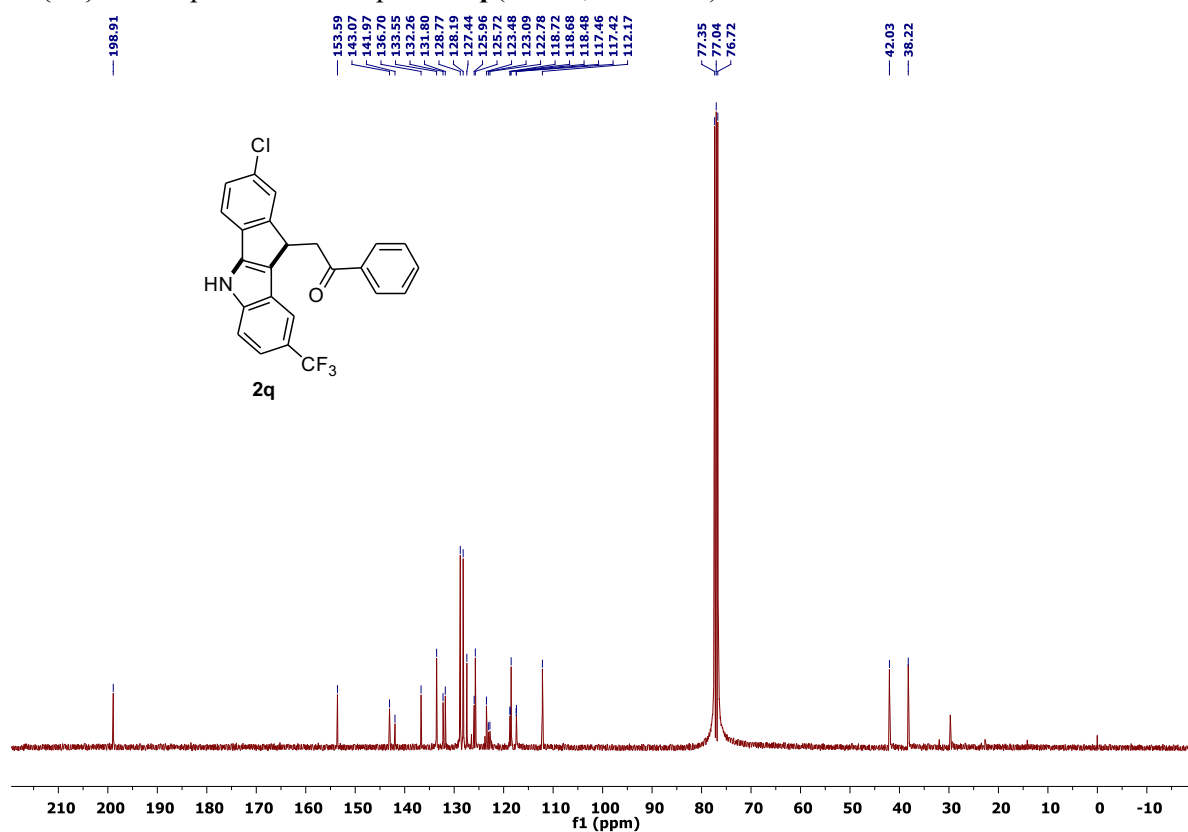

$^1\text{H}$  NMR spectrum of compound **2r** ( $\text{CDCl}_3$ , 400 MHz)

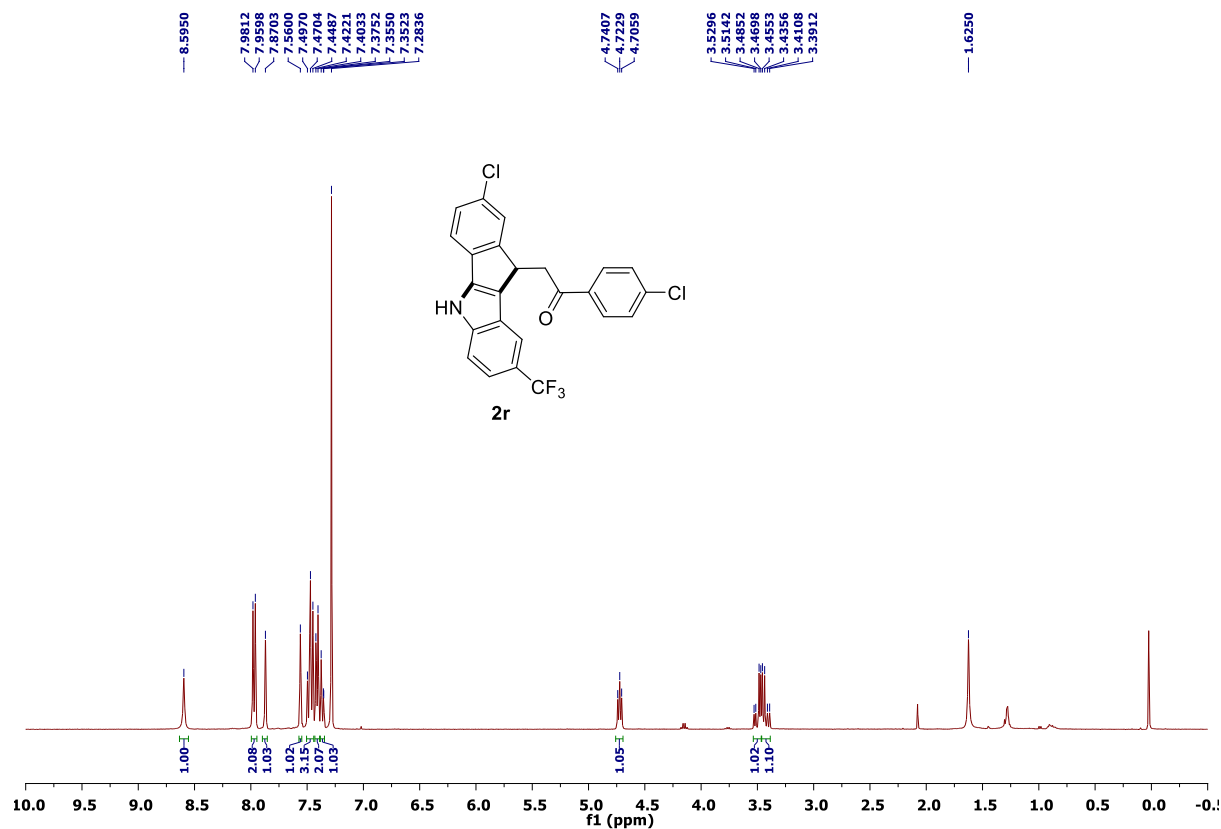

$^{13}\text{C}\{^1\text{H}\}$  NMR spectrum of compound **2r** ( $\text{CDCl}_3$ , 101 MHz)

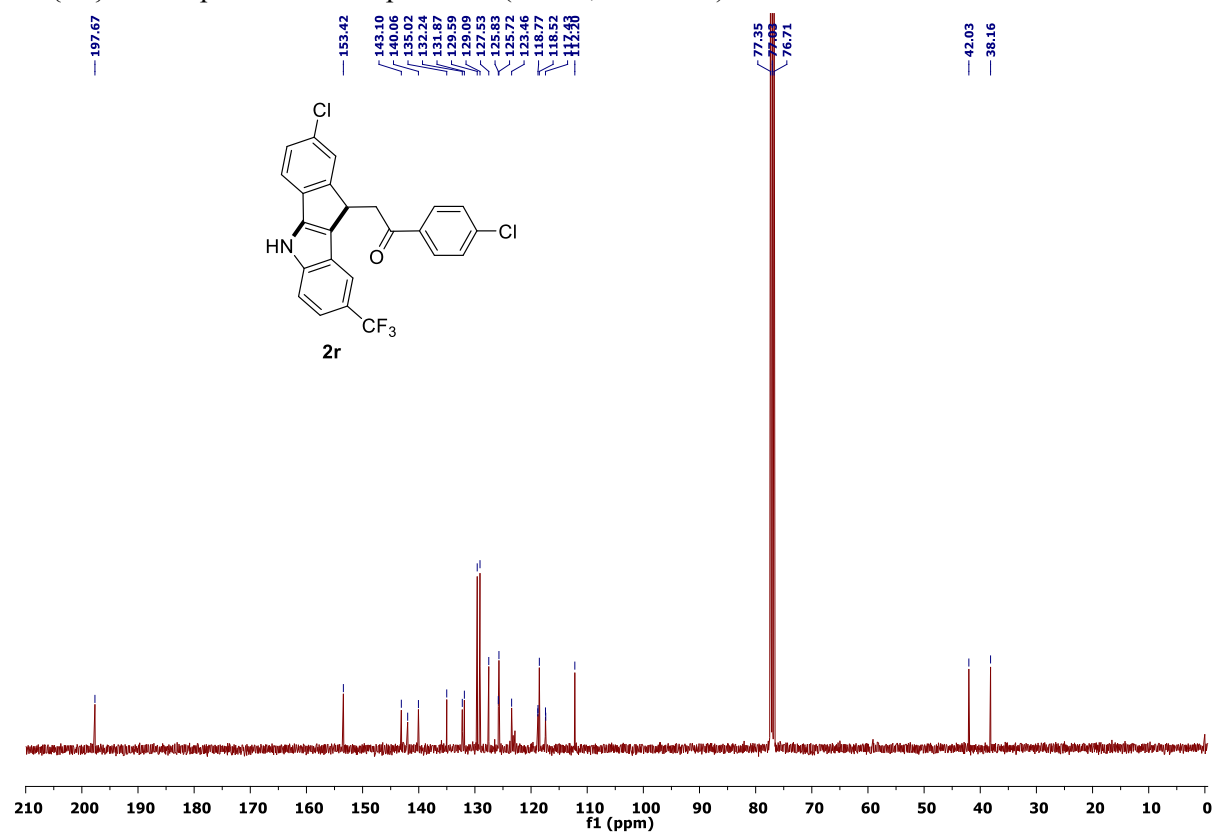

$^1\text{H}$  NMR spectrum of compound **3a** (DMSO- $d_6$ , 400 MHz)

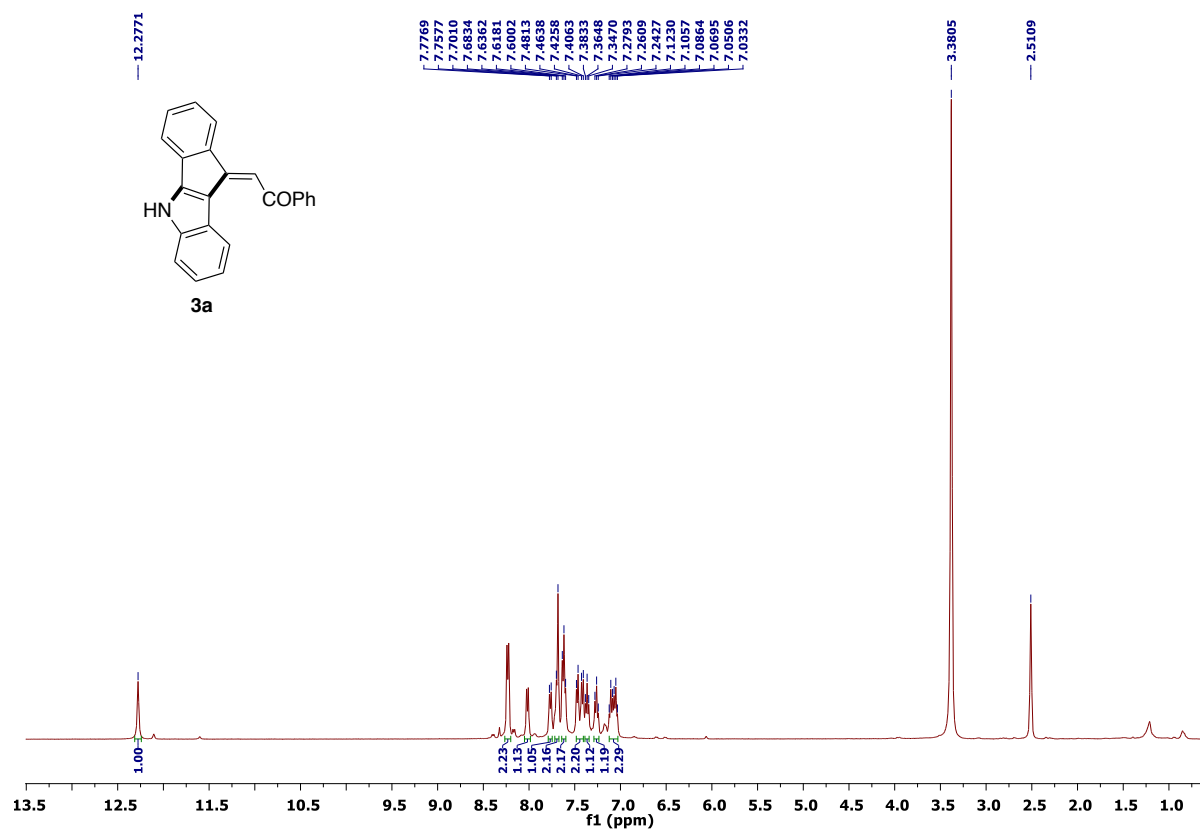

$^{13}\text{C}\{^1\text{H}\}$  NMR spectrum of compound **3a** (DMSO- $d_6$ , 101 MHz)

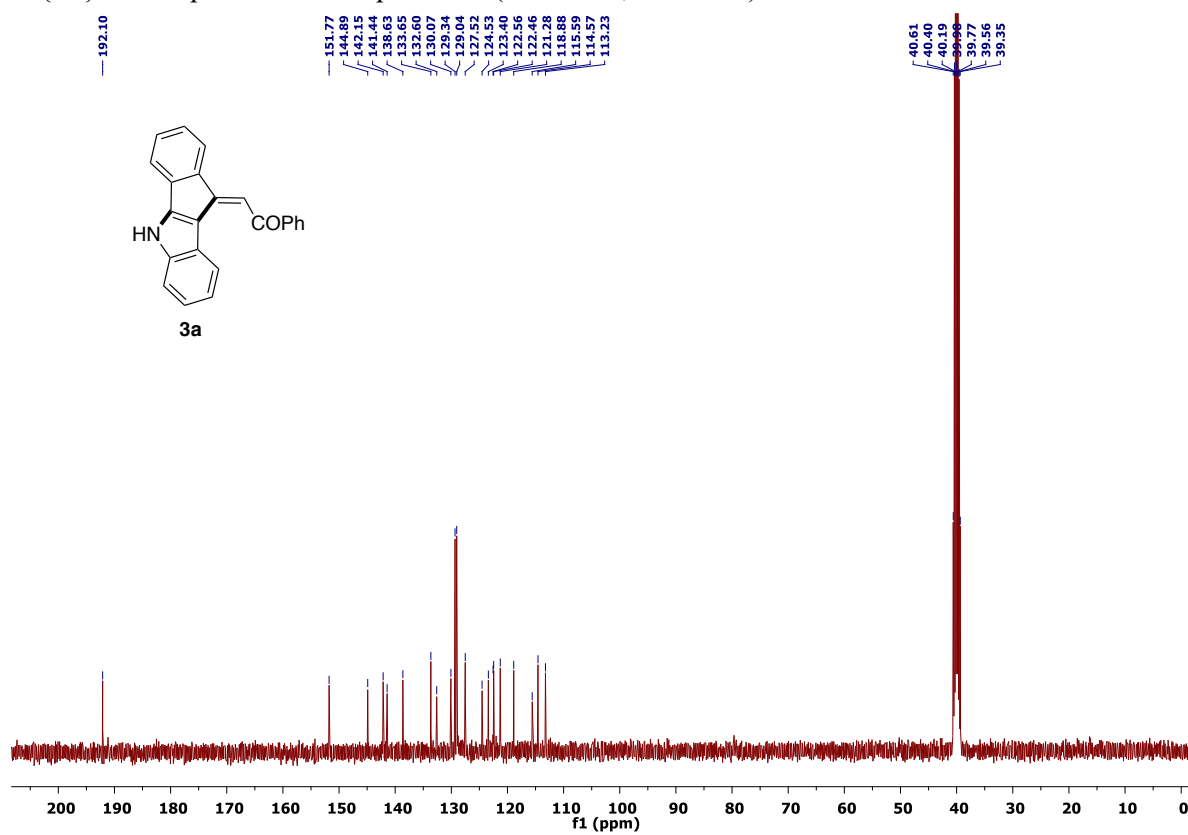

$^1\text{H}$  NMR spectrum of compound **3s** ( $\text{CDCl}_3$ , 400 MHz)

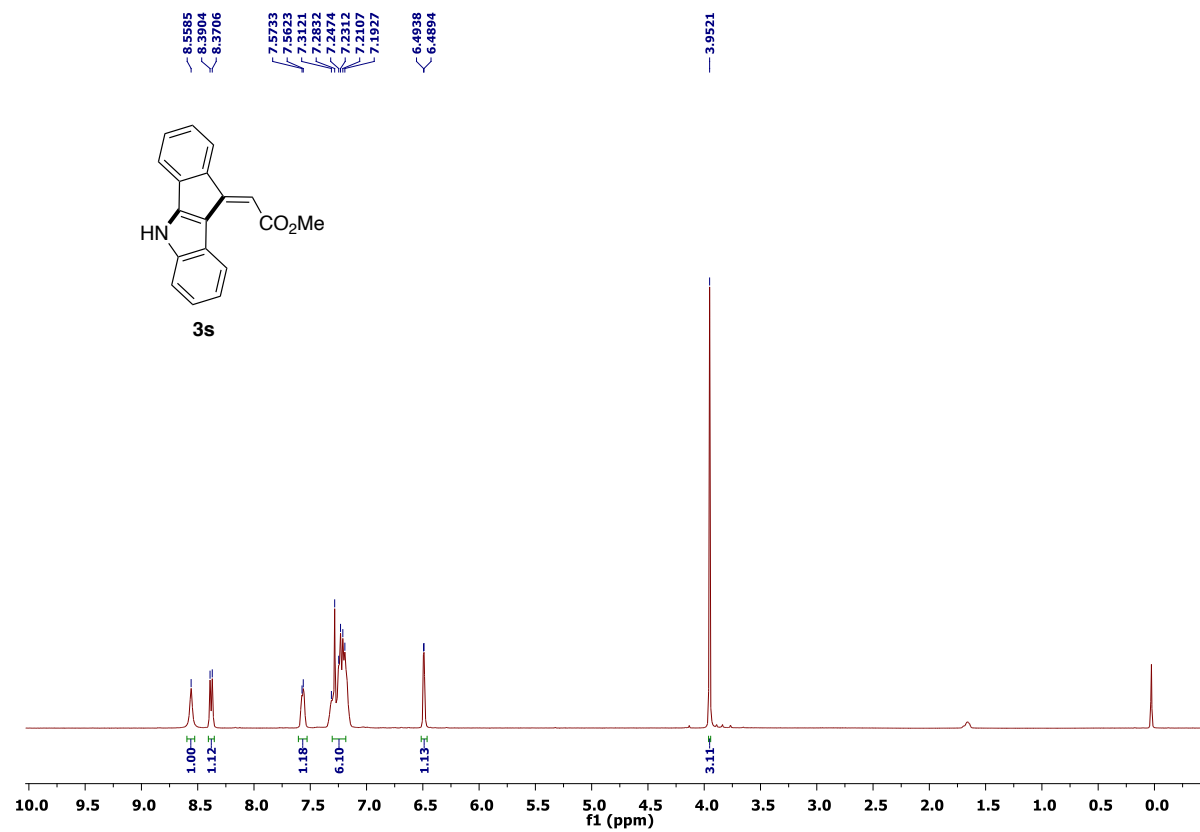

$^{13}\text{C}\{^1\text{H}\}$  NMR spectrum of compound **3s** ( $\text{CDCl}_3$ , 101 MHz)

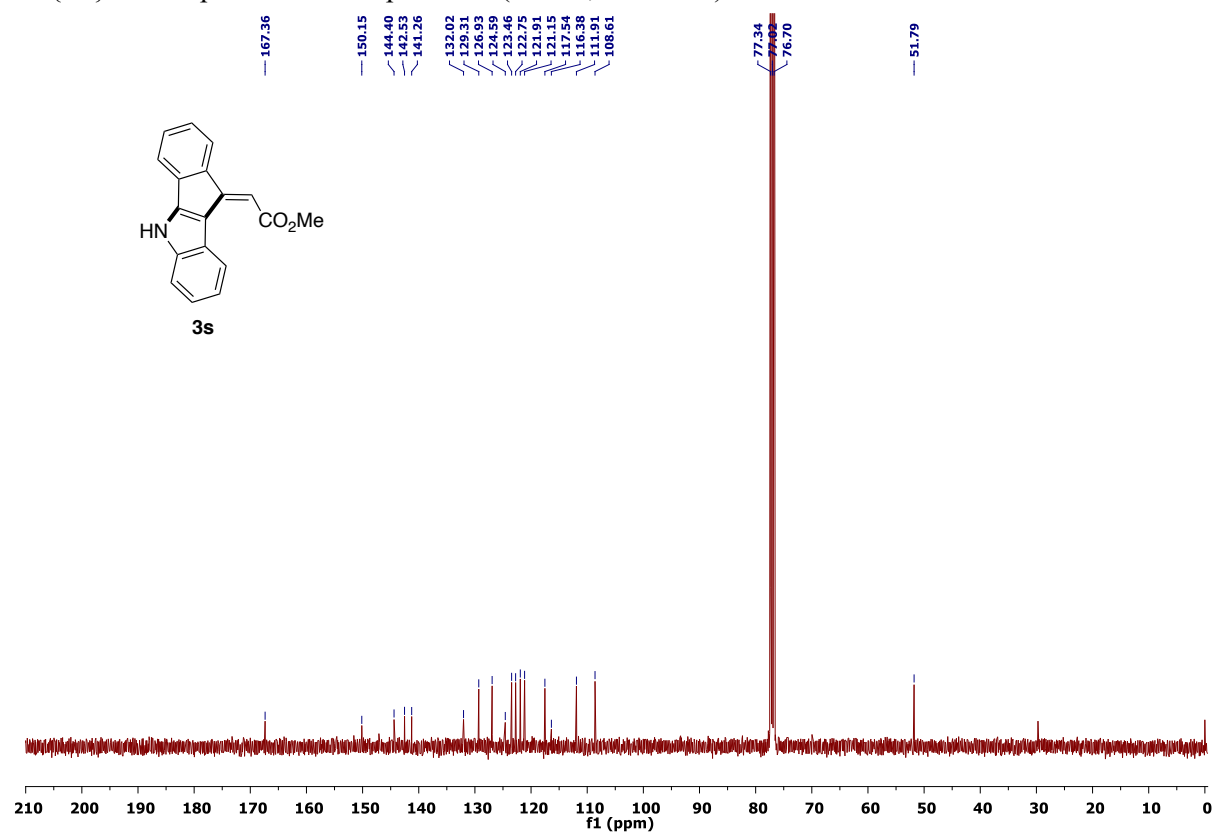



NOESY spectrum of compound **3s** (CDCl<sub>3</sub>, 400 MHz)

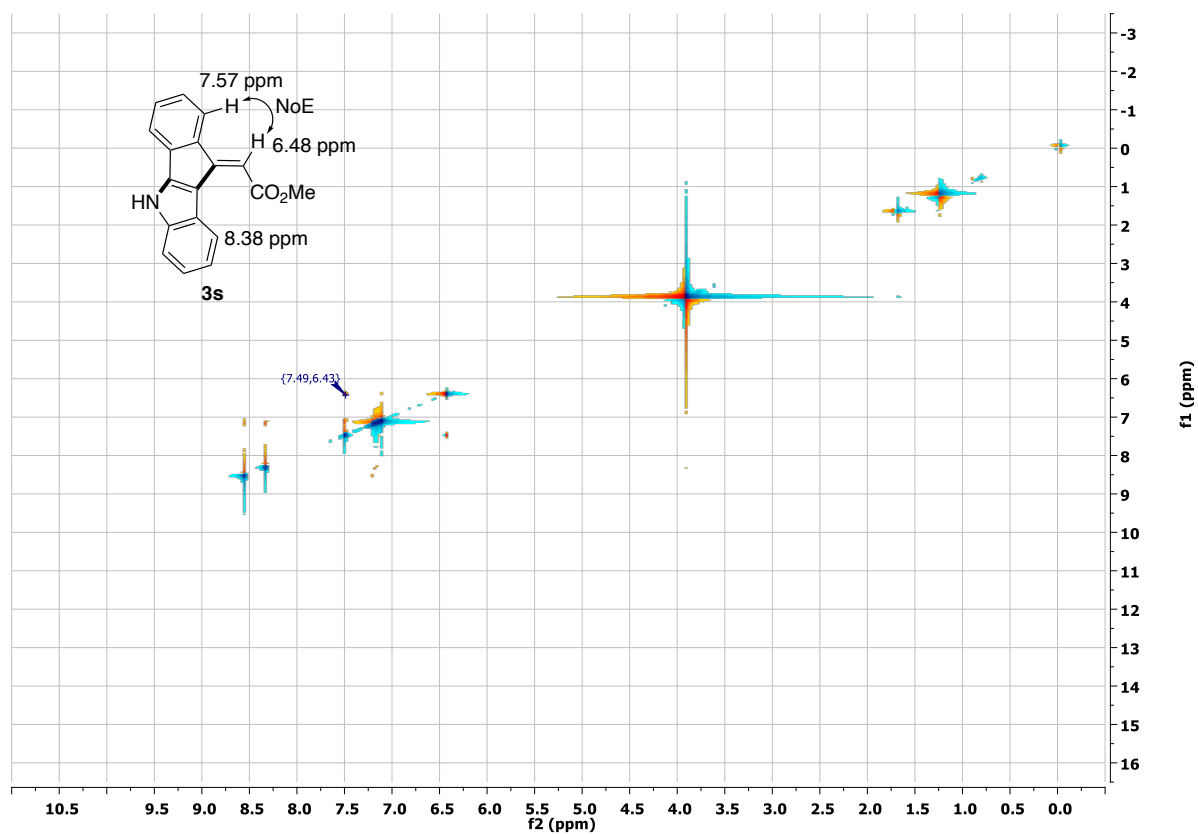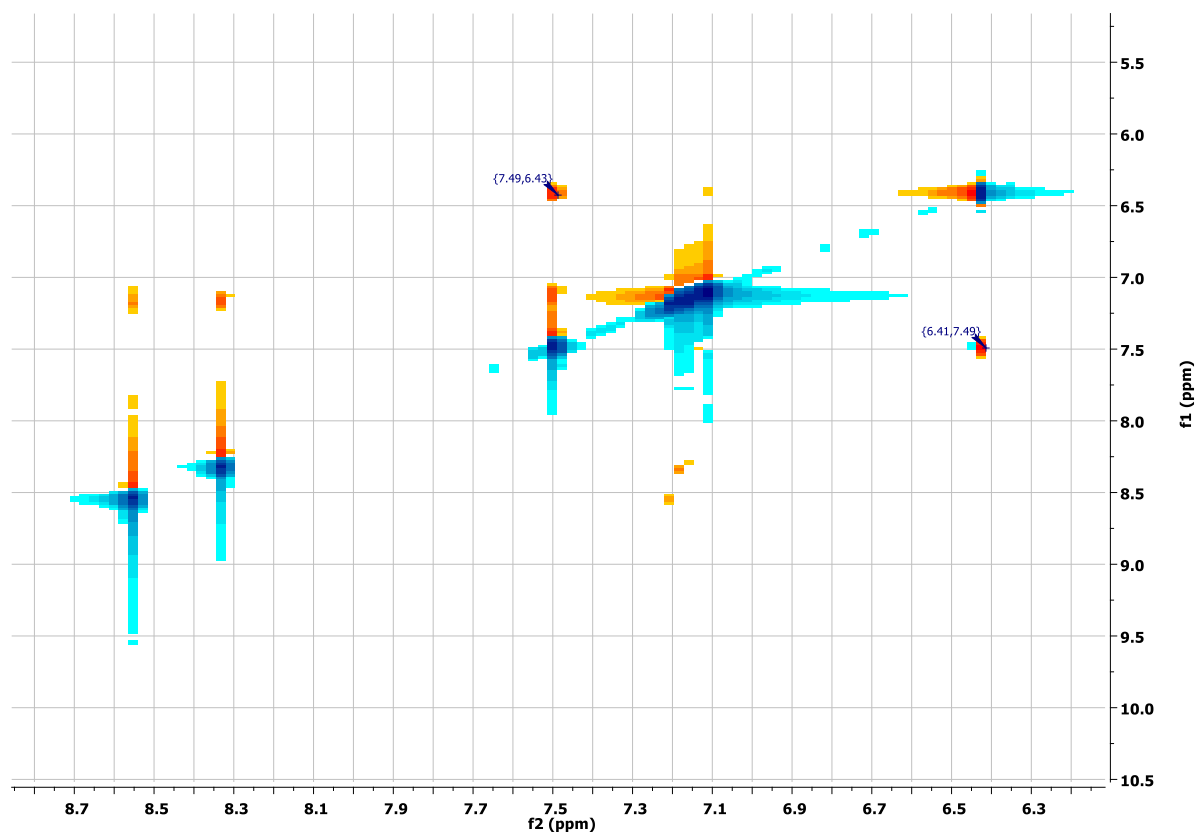

$^1\text{H}$  NMR spectrum of compound **3t** ( $\text{CDCl}_3$ , 400 MHz)

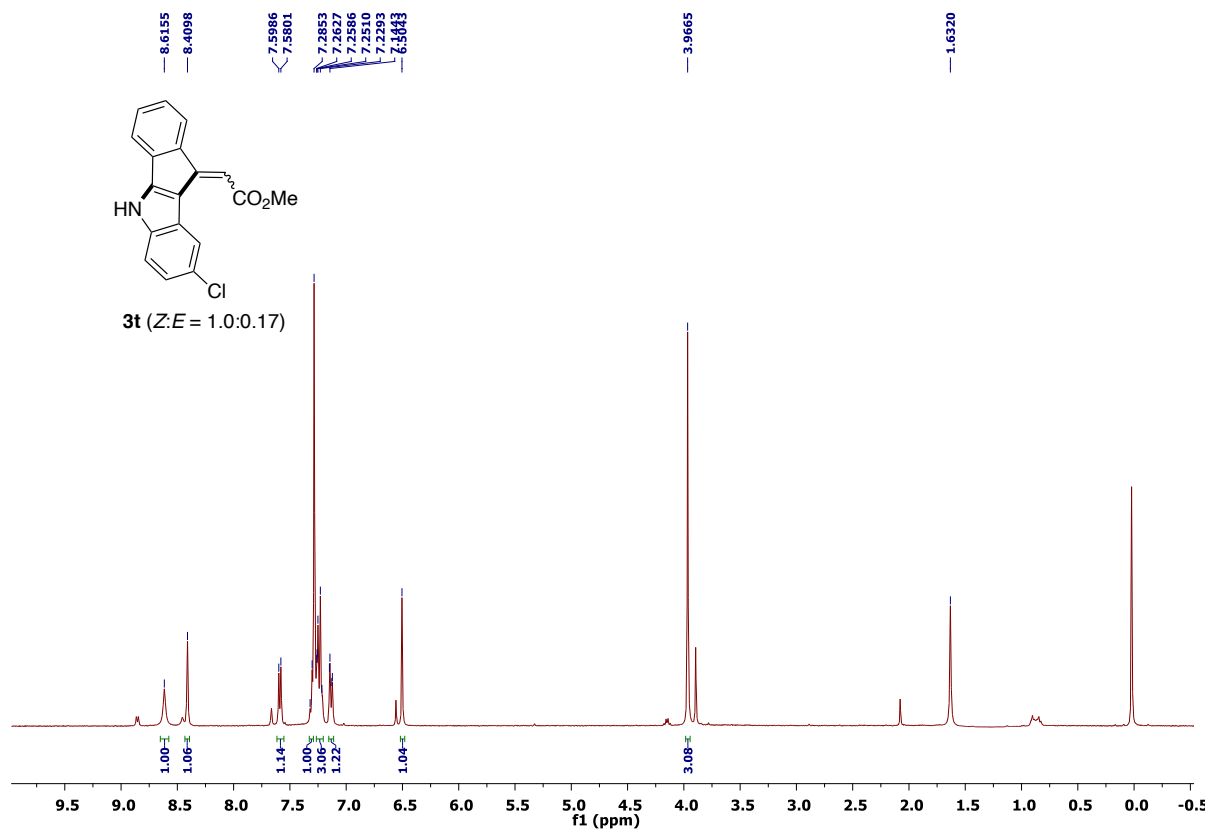

$^{13}\text{C}\{^1\text{H}\}$  NMR spectrum of compound **3t** ( $\text{CDCl}_3$ , 101 MHz)

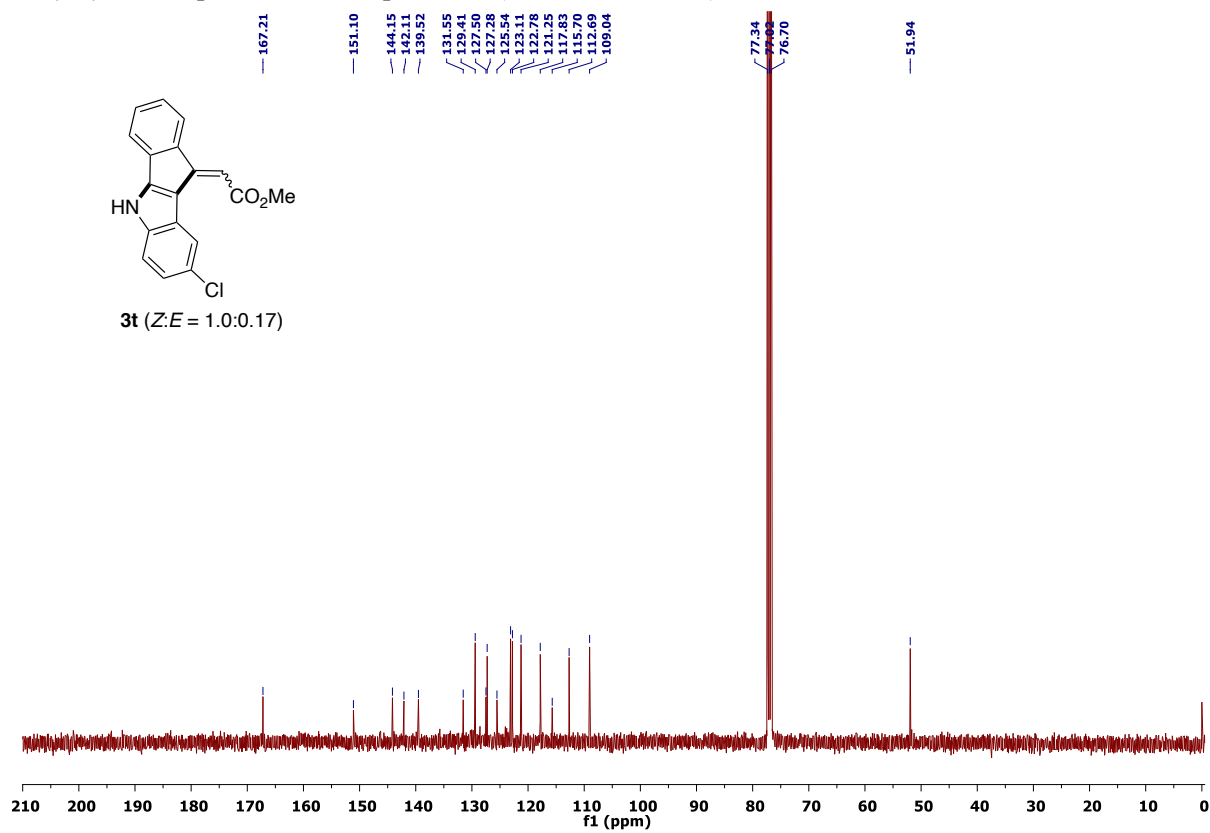

Supplement: d3ob00041a1.pdf [file d3ob00041a1.pdf]
